# Supplementary material
Source: HighWire-hosted journal article supplement (https://gut.bmj.com/content/70/7/1325)
Supplement: inline-supplementary-material-2 [file inline-supplementary-material-2.xlsx]

## Sheet: Suppl. Table 1
Supplementary Table 1. Characteristics of studies and study participants contributing to the GWAS meta-analyses.
						Proximal Colon Cancer Cases				Distal Colon Cancer Cases				Rectal Cancer Cases				Colon Cancer Casesa				Distal Colorectal Cancer Casesb				Controls
Study Acronym	Study Name	Study Design	Country	Genotyping Platform	N total	N	N Females (%)	Mean age (SD), years		N	N Females (%)	Mean age (SD), years		N	N Females (%)	Mean age (SD), years		N	N Females (%)	Mean age (SD), years		N	N Females (%)	Mean age (SD), years		N	N Females (%)	Mean age (SD), years
ASTERISK	Association STudy Evaluating RISK for sporadic colorectal cancer	case-control	France	Illumina 300K	1829	249	112 (45.0)	F: 70.7 (10.5) M: 66.3 (9.6)		373	135 (36.2)	F: 62.7 (10.5) M: 65.6 (9.2)		260	90 (34.6)	F: 64.4 (12.2) M: 64.8 (9.3)		622	247 (39.7)	F: 66.3 (11.2) M: 65.9 (9.3)		633	225 (35.5)	F: 63.4 (11.2) M: 65.3 (9.2)		947	423 (44.7)	F: 62.7 (10.5) M: 61.3 (9.8)
ATBC	Alpha-Tocopherol, Beta Carotene Cancer Prevention Study	cohort	Finland	Illumina Oncoarray	177	37	0 (0.0)	F: - M: 69.2 (5.5)		34	0 (0.0)	F: - M: 68.5 (6.0)		72	0 (0.0)	F: - M: 69.1 (5.1)		75	0 (0.0)	F: - M: 69.1 (5.7)		106	0 (0.0)	F: - M: 68.9 (5.4)		30	0 (0.0)	F: - M: 57.2 (4.4)
CCFR_1	Colon Cancer Family Registry	case-control	USA, Canada, Australia	Illumina 1M, 1M duo	1995	275	148 (53.8)	F: 52.8 (12.7) M: 56.1 (11.8)		328	164 (50.0)	F: 50.4 (10.9) M: 55.0 (11.1)		406	178 (43.8)	F: 49.9 (10.7) M: 51.1 (10.2)		611	315 (51.6)	F: 51.6 (11.9) M: 55.4 (11.4)		734	342 (46.6)	F: 50.1 (10.8) M: 52.8 (10.7)		978	509 (52.0)	F: 57.6 (11.3) M: 58.5 (10.4)
CCFR_2	Colon Cancer Family Registry	case-control	USA, Canada, Australia	Illumina Omni 1	695	80	49 (61.3)	F: 53.0 (10.8) M: 53.9 (10.4)		102	60 (58.8)	F: 49.9 (10.5) M: 55.0 (13.2)		115	55 (47.8)	F: 48.6 (10.4) M: 50.2 (9.6)		195	113 (57.9)	F: 51.2 (10.6) M: 54.1 (12.0)		217	115 (53.0)	F: 49.3 (10.4) M: 52.2 (11.5)		385	209 (54.3)	F: 52.9 (11.1) M: 52.3 (11.9)
CCFR_3	Colon Cancer Family Registry	case-control	USA, Canada, Australia	Affymetrix Axiom	1805	395	215 (54.4)	F: 52.4 (12.4) M: 49.9 (11.4)		308	172 (55.8)	F: 50.1 (10.3) M: 50.6 (8.6)		370	163 (44.1)	F: 47.4 (10.1) M: 50.5 (9.5)		774	421 (54.4)	F: 51.5 (11.6) M: 50.2 (10.5)		678	335 (49.4)	F: 48.8 (10.3) M: 50.5 (9.1)		661	358 (54.2)	F: 52.3 (11.9) M: 53.3 (11.3)
CCFR_4	Colon Cancer Family Registry	case-control	USA, Canada, Australia	Illumina Oncoarray	2060	483	201 (41.6)	F: 50.2 (12.7) M: 56.6 (13.1)		461	187 (40.6)	F: 51.4 (11.0) M: 55.0 (11.1)		525	189 (36.0)	F: 48.7 (12.5) M: 54.4 (11.2)		1001	417 (41.7)	F: 50.6 (11.8) M: 55.9 (12.2)		986	376 (38.1)	F: 50.0 (11.8) M: 54.6 (11.2)		534	247 (46.3)	F: 50.8 (13.2) M: 55.6 (13.5)
CLUEII	Campaign against Cancer and Heart Disease II	cohort	USA	Illumina Oncoarray+custom iSelect	515	114	73 (64.0)	F: 73.2 (11.0) M: 71.1 (8.9)		76	35 (46.1)	F: 71.5 (11.0) M: 69.5 (11.0)		56	24 (42.9)	F: 67.1 (10.9) M: 70.4 (9.7)		199	111 (55.8)	F: 72.9 (11.0) M: 70.3 (9.9)		132	59 (44.7)	F: 69.7 (11.1) M: 69.9 (10.4)		260	141 (54.2)	F: 61.4 (11.9) M: 60.2 (10.7)
Colo2&3	Hawai’i Colorectal Cancer Studies 2&3	case series	USA	Illumina 300K	210	35	14 (40.0)	F: 72.1 (12.1) M: 66.1 (11.5)		24	8 (33.3)	F: 65.6 (12.8) M: 64.5 (10.6)		27	17 (63.0)	F: 61.8 (9.3) M: 62.4 (13.7)		59	22 (37.3)	F: 69.8 (12.5) M: 65.4 (11.0)		51	25 (49.0)	F: 63.0 (10.4) M: 63.7 (11.7)		124	54 (43.5)	F: 65.6 (10.5) M: 64.5 (11.4)
ColoCare_Heidelberg	ColoCare Consortium	case series	Germany	Illumina Oncoarray	223	0	0 (-)	F: - M: -		0	0 (-)	F: - M: -		105	30 (28.6)	F: 60.3 (9.5) M: 61.2 (11.2)		82	33 (40.2)	F: 66.2 (11.3) M: 63.1 (13.6)		105	30 (28.6)	F: 60.3 (9.5) M: 61.2 (11.2)		36	19 (52.8)	F: 52.9 (10.1) M: 59.4 (14.5)
ColoCare_Seattle	ColoCare Consortium	case series	USA	Illumina Oncoarray	169	0	0 (-)	F: - M: -		0	0 (-)	F: - M: -		66	26 (39.4)	F: 55.6 (10.8) M: 53.9 (11.7)		103	47 (45.6)	F: 56.1 (13.2) M: 59.4 (14.8)		66	26 (39.4)	F: 55.6 (10.8) M: 53.9 (11.7)		0	0 (-)	F: - M: -
COLONc	Colorectal Cancer: Longitudinal Observational study on Nutritional and lifestyle factors that influence colorectal tumor recurrence, survival and quality of life	case series and case-control	Netherlands	Illumina OmniExpressExome	1273	178	79 (44.4)	F: 68.0 (8.5) M: 66.5 (9.9)		208	73 (35.1)	F: 63.9 (10.2) M: 66.0 (8.7)		195	59 (30.3)	F: 61.9 (10.3) M: 65.2 (7.8)		386	152 (39.4)	F: 66.0 (9.5) M: 66.2 (9.2)		403	132 (32.8)	F: 63.0 (10.3) M: 65.6 (8.3)		692	256 (37.0)	F: 60.8 (6.9) M: 62.0 (6.2)
CORSA_1	Colorectal Cancer Study of Austria	case-control	Austria	Affymetrix Axiom	2130	400	132 (33.0)	F: 64.1 (12.3) M: 65.8 (10.5)		519	197 (38.0)	F: 63.8 (11.3) M: 62.0 (11.2)		437	172 (39.4)	F: 63.8 (10.7) M: 61.5 (10.6)		919	329 (35.8)	F: 63.9 (11.7) M: 63.7 (11.0)		956	369 (38.6)	F: 63.8 (11.0) M: 61.8 (10.9)		774	332 (42.9)	F: 63.1 (10.9) M: 62.9 (10.1)
CORSA_2	Colorectal Cancer Study of Austria	case-control	Austria	Illumina Oncoarray+custom iSelect	1675	113	48 (42.5)	F: 65.3 (13.1) M: 63.7 (13.4)		109	48 (44.0)	F: 60.5 (12.9) M: 64.0 (11.5)		180	59 (32.8)	F: 62.1 (10.0) M: 62.9 (10.5)		222	96 (43.2)	F: 62.9 (13.2) M: 63.9 (12.5)		289	107 (37.0)	F: 61.4 (11.3) M: 63.3 (10.9)		1273	451 (35.4)	F: 60.5 (12.5) M: 55.5 (13.0)
CPSII	American Cancer Society Cancer Prevention Study II nested case-control study	cohort	USA	Affymetrix Axiom	1071	263	147 (55.9)	F: 75.4 (5.5) M: 76.1 (5.4)		140	60 (42.9)	F: 74.8 (5.7) M: 75.5 (4.9)		104	46 (44.2)	F: 74.4 (6.3) M: 74.2 (5.8)		431	219 (50.8)	F: 75.5 (5.8) M: 75.9 (5.2)		244	106 (43.4)	F: 74.6 (5.9) M: 74.9 (5.3)		536	260 (48.5)	F: 68.2 (5.6) M: 69.1 (5.3)
CPSII_2	American Cancer Society Cancer Prevention Study II nested case-control study	cohort	USA	Illumina Oncoarray+custom iSelect	670	175	98 (56.0)	F: 78.9 (5.5) M: 80.0 (5.5)		54	25 (46.3)	F: 78.8 (5.6) M: 79.9 (4.2)		61	27 (44.3)	F: 78.2 (7.0) M: 78.2 (4.5)		260	137 (52.7)	F: 79.4 (5.8) M: 80.3 (5.1)		115	52 (45.2)	F: 78.5 (6.3) M: 79.0 (4.4)		349	184 (52.7)	F: 68.1 (6.1) M: 69.2 (5.2)
CRCGEN	Colorectal Cancer Genetics & Genomics, Spanish study	case-control	Spain	Illumina Oncoarray	1532	196	84 (42.9)	F: 67.8 (13.3) M: 68.7 (10.6)		266	92 (34.6)	F: 66.0 (11.6) M: 69.0 (9.6)		281	88 (31.3)	F: 66.2 (10.6) M: 66.0 (10.5)		465	176 (37.8)	F: 66.9 (12.4) M: 68.7 (10.2)		547	180 (32.9)	F: 66.1 (11.1) M: 67.4 (10.2)		786	366 (46.6)	F: 62.9 (12.6) M: 66.8 (10.6)
CzechCCS	Czech Republic CCS	case-control	Czech Republic	Illumina Oncoarray+custom iSelect	2308	140	49 (35.0)	F: 68.4 (11.2) M: 70.0 (9.2)		162	58 (35.8)	F: 64.4 (12.3) M: 65.4 (11.4)		343	122 (35.6)	F: 64.2 (11.5) M: 63.5 (11.0)		347	126 (36.3)	F: 65.7 (11.9) M: 67.4 (10.7)		505	180 (35.6)	F: 64.3 (11.7) M: 64.1 (11.1)		1618	735 (45.4)	F: 50.3 (14.8) M: 50.8 (12.5)
DACHS_1	Darmkrebs: Chancen der Verhütung durch Screening	case-control	Germany	Illumina 300K	3404	547	263 (48.1)	F: 71.4 (10.4) M: 69.4 (10.2)		485	209 (43.1)	F: 68.7 (10.7) M: 68.2 (9.6)		668	231 (34.6)	F: 66.9 (12.1) M: 66.4 (9.3)		1034	473 (45.7)	F: 70.2 (10.6) M: 68.8 (9.9)		1153	440 (38.2)	F: 67.8 (11.5) M: 67.1 (9.4)		1702	685 (40.2)	F: 69.0 (10.1) M: 68.6 (10.3)
DACHS_2	Darmkrebs: Chancen der Verhütung durch Screening	case-control	Germany	Illumina OmniExpress	1164	210	100 (47.6)	F: 72.7 (10.7) M: 71.4 (10.7)		175	57 (32.6)	F: 70.2 (11.0) M: 66.6 (10.4)		281	103 (36.7)	F: 66.4 (12.8) M: 67.2 (10.1)		385	157 (40.8)	F: 71.8 (10.8) M: 68.9 (10.8)		456	160 (35.1)	F: 67.8 (12.3) M: 66.9 (10.2)		498	175 (35.1)	F: 70.8 (10.3) M: 69.1 (9.4)
DACHS_3	Darmkrebs: Chancen der Verhütung durch Screening Study	case-control	Germany	Illumina OmniExpressExome	1827	429	191 (44.5)	F: 72.2 (9.9) M: 69.9 (10.3)		321	112 (34.9)	F: 69.9 (11.8) M: 68.1 (10.5)		459	153 (33.3)	F: 65.9 (11.7) M: 66.5 (10.3)		751	303 (40.3)	F: 71.3 (10.7) M: 69.1 (10.4)		780	265 (34.0)	F: 67.6 (11.9) M: 67.2 (10.4)		617	242 (39.2)	F: 65.8 (12.9) M: 67.2 (10.8)
DALS_1	Diet, Activity and Lifestyle Study	case-control	USA	Illumina 550K, 610K	1407	325	149 (45.8)	F: 66.7 (10.2) M: 64.9 (10.2)		358	150 (41.9)	F: 65.0 (9.5) M: 64.2 (8.6)		0	0 (-)	F: - M: -		698	300 (43.0)	F: 65.8 (9.9) M: 64.6 (9.4)		358	150 (41.9)	F: 65.0 (9.5) M: 64.2 (8.6)		709	309 (43.6)	F: 64.3 (9.9) M: 63.2 (9.9)
DALS_2	Diet, Activity and Lifestyle Study	case-control	USA	Illumina 300K	863	205	98 (47.8)	F: 66.0 (10.1) M: 65.2 (10.6)		181	85 (47.0)	F: 63.4 (10.5) M: 66.0 (8.4)		0	0 (-)	F: - M: -		402	190 (47.3)	F: 64.9 (10.5) M: 65.4 (9.9)		181	85 (47.0)	F: 63.4 (10.5) M: 66.0 (8.4)		461	220 (47.7)	F: 64.3 (9.8) M: 64.3 (10.2)
EDRN	Early Detection Research Network	case cohort	USA	Illumina Oncoarray+custom iSelect	582	88	45 (51.1)	F: 66.8 (11.4) M: 63.8 (13.1)		68	29 (42.6)	F: 60.3 (15.8) M: 64.6 (11.5)		110	31 (28.2)	F: 57.8 (12.3) M: 60.7 (10.8)		156	74 (47.4)	F: 64.3 (13.6) M: 64.2 (12.3)		178	60 (33.7)	F: 59.0 (14.0) M: 62.0 (11.1)		316	161 (50.9)	F: 59.1 (10.4) M: 60.0 (10.8)
EPIC	European Prospective Investigation into Cancer and Nutrition	cohort	Europe	Illumina OmniExpressExome	4382	580	344 (59.3)	F: 65.7 (7.9) M: 64.9 (9.2)		662	361 (54.5)	F: 63.2 (8.6) M: 63.9 (7.7)		712	343 (48.2)	F: 62.8 (8.4) M: 63.6 (8.0)		1364	766 (56.2)	F: 64.4 (8.5) M: 64.4 (8.4)		1374	704 (51.2)	F: 63.0 (8.5) M: 63.7 (7.9)		2306	1232 (53.4)	F: 56.6 (8.1) M: 56.8 (8.1)
EPICOLON	EPICOLON	case-control	Spain	Illumina Oncoarray+custom iSelect	608	54	17 (31.5)	F: 59.9 (10.7) M: 59.3 (9.4)		123	54 (43.9)	F: 53.5 (10.2) M: 58.0 (8.6)		77	32 (41.6)	F: 53.9 (8.9) M: 55.6 (9.4)		189	78 (41.3)	F: 54.2 (10.8) M: 58.3 (8.9)		200	86 (43.0)	F: 53.6 (9.7) M: 57.1 (9.0)		342	141 (41.2)	F: 58.7 (6.6) M: 59.7 (6.4)
ESTHER_VERDI	Epidemiologische Studie zu Chancen der Verhütung, Früherkennung und optimierten Therapie chronischer Erkrankungen in der älteren Bevölkerung; Verlauf der diagnotischen Abklärung bei Krebspatienten	case-control	Germany	Illumina Oncoarray	807	74	33 (44.6)	F: 66.8 (8.2) M: 63.0 (6.9)		112	43 (38.4)	F: 65.8 (9.5) M: 65.8 (6.0)		185	51 (27.6)	F: 64.5 (8.2) M: 64.7 (6.7)		202	82 (40.6)	F: 66.2 (8.6) M: 64.9 (6.3)		297	94 (31.6)	F: 65.1 (8.8) M: 65.1 (6.5)		420	147 (35.0)	F: 65.3 (7.1) M: 65.1 (5.9)
HawaiiCCS_AD	Hawaii Adenoma Study	case-control	USA	Illumina Oncoarray+custom iSelect	543	0	0 (-)	F: - M: -		0	0 (-)	F: - M: -		0	0 (-)	F: - M: -		0	0 (-)	F: - M: -		0	0 (-)	F: - M: -		543	191 (35.2)	F: 61.9 (8.8) M: 60.6 (7.7)
HPFS_1	Health Professionals Follow-Up Study	cohort	USA	Illumina OmniExpress	434	82	0 (0.0)	F: - M: 71.4 (8.7)		76	0 (0.0)	F: - M: 68.8 (8.8)		48	0 (0.0)	F: - M: 71.4 (8.6)		158	0 (0.0)	F: - M: 70.1 (8.8)		124	0 (0.0)	F: - M: 69.8 (8.8)		228	0 (0.0)	F: - M: 66.1 (8.9)
HPFS_2	Health Professionals Follow-Up Study	cohort	USA	Illumina OmniExpress	323	54	0 (0.0)	F: - M: 68.4 (9.0)		57	0 (0.0)	F: - M: 64.7 (8.5)		40	0 (0.0)	F: - M: 66.7 (11.3)		111	0 (0.0)	F: - M: 66.6 (8.9)		97	0 (0.0)	F: - M: 65.6 (9.8)		172	0 (0.0)	F: - M: 64.0 (8.8)
HPFS_4	Health Professionals Follow-Up Study	cohort	USA	Illumina OmniExpressExome	197	0	0 (-)	F: - M: -		0	0 (-)	F: - M: -		0	0 (-)	F: - M: -		0	0 (-)	F: - M: -		0	0 (-)	F: - M: -		197	0 (0.0)	F: - M: 70.9 (8.8)
HPFS_5_AD	Health Professionals Follow-Up Study	cohort	USA	Illumina Oncoarray+custom iSelect	105	0	0 (-)	F: - M: -		0	0 (-)	F: - M: -		0	0 (-)	F: - M: -		0	0 (-)	F: - M: -		0	0 (-)	F: - M: -		105	0 (0.0)	F: - M: 66.5 (7.9)
Kentucky	Kentucky Case-Control Study	case-control	USA	Affymetrix Axiom	2004	470	262 (55.7)	F: 64.2 (9.5) M: 63.8 (9.7)		396	184 (46.5)	F: 61.1 (11.6) M: 62.0 (10.6)		0	0 (-)	F: - M: -		872	451 (51.7)	F: 62.8 (10.5) M: 62.9 (10.2)		396	184 (46.5)	F: 61.1 (11.6) M: 62.0 (10.6)		1132	573 (50.6)	F: 66.7 (6.6) M: 60.4 (9.2)
LCCS	Leeds Colorectal Cancer Study	case-control	UK	Illumina Oncoarray+custom iSelect	2173	350	172 (49.1)	F: 70.8 (10.1) M: 69.4 (9.5)		391	163 (41.7)	F: 67.5 (9.9) M: 66.5 (9.8)		615	206 (33.5)	F: 65.0 (11.8) M: 65.3 (9.5)		857	388 (45.3)	F: 69.2 (10.3) M: 68.1 (9.7)		1006	369 (36.7)	F: 66.1 (11.0) M: 65.8 (9.6)		701	371 (52.9)	F: 67.6 (9.1) M: 68.3 (8.2)
MCCS	Melbourne Collaborative Cohort Study	cohort	Australia	Affymetrix Axiom	1160	201	112 (55.7)	F: 71.9 (8.7) M: 71.4 (8.5)		141	64 (45.4)	F: 68.9 (9.4) M: 70.4 (8.4)		177	74 (41.8)	F: 69.3 (8.1) M: 68.0 (8.0)		349	179 (51.3)	F: 70.6 (9.1) M: 71.0 (8.4)		318	138 (43.4)	F: 69.1 (8.7) M: 69.0 (8.2)		634	309 (48.7)	F: 60.3 (7.3) M: 60.5 (7.8)
MEC	Multiethnic Cohort Study	cohort	USA	Illumina 300K	81	0	0 (-)	F: - M: -		0	0 (-)	F: - M: -		0	0 (-)	F: - M: -		0	0 (-)	F: - M: -		0	0 (-)	F: - M: -		81	38 (46.9)	F: 63.8 (8.4) M: 61.7 (9.0)
MEC_1	Multiethnic Cohort Study	cohort	USA	Illumina 300K	666	154	81 (52.6)	F: 71.5 (8.1) M: 71.4 (8.9)		85	28 (32.9)	F: 68.6 (8.1) M: 69.0 (8.0)		81	36 (44.4)	F: 68.8 (7.4) M: 67.0 (8.3)		239	109 (45.6)	F: 70.7 (8.1) M: 70.4 (8.6)		166	64 (38.6)	F: 68.7 (7.7) M: 68.2 (8.2)		346	163 (47.1)	F: 63.3 (7.7) M: 62.9 (8.3)
MECC_1	Molecular Epidemiology of Colorectal Cancer Study	case-control	Israel	Illumina OmniExpress	973	178	85 (47.8)	F: 73.2 (10.1) M: 74.2 (9.8)		222	101 (45.5)	F: 69.0 (11.2) M: 72.6 (9.0)		78	30 (38.5)	F: 69.9 (9.8) M: 71.7 (8.7)		400	186 (46.5)	F: 70.9 (10.9) M: 73.3 (9.4)		300	131 (43.7)	F: 69.2 (10.9) M: 72.3 (8.9)		495	233 (47.1)	F: 71.9 (10.8) M: 73.6 (9.4)
MECC_2	Molecular Epidemiology of Colorectal Cancer Study	case-control	Israel	Affymetrix Axiom	1818	331	187 (56.5)	F: 73.2 (10.1) M: 74.3 (9.6)		325	157 (48.3)	F: 70.1 (12.8) M: 71.9 (9.7)		354	167 (47.2)	F: 68.7 (10.8) M: 70.3 (11.2)		656	344 (52.4)	F: 71.8 (11.5) M: 73.0 (9.7)		679	324 (47.7)	F: 69.4 (11.8) M: 71.1 (10.5)		808	402 (49.8)	F: 72.8 (11.4) M: 75.0 (10.4)
MECC_3	Molecular Epidemiology of Colorectal Cancer Study	case-control	Israel	Illumina Oncoarray	4089	762	366 (48.0)	F: 70.8 (11.8) M: 70.2 (12.3)		740	332 (44.9)	F: 64.9 (13.0) M: 68.8 (12.0)		777	342 (44.0)	F: 64.5 (13.1) M: 65.9 (12.0)		1502	698 (46.5)	F: 68.0 (12.7) M: 69.5 (12.2)		1517	674 (44.4)	F: 64.7 (13.1) M: 67.3 (12.1)		1810	840 (46.4)	F: 68.9 (12.8) M: 69.9 (11.7)
NCCCSI	North Carolina Colon Cancer Study, I	case-control	USA	Illumina Oncoarray+custom iSelect	702	107	53 (49.5)	F: 66.3 (9.5) M: 64.5 (8.8)		92	36 (39.1)	F: 64.2 (10.2) M: 63.4 (9.7)		27	10 (37.0)	F: 57.8 (7.0) M: 62.6 (11.6)		206	92 (44.7)	F: 65.1 (10.0) M: 64.0 (9.1)		119	46 (38.7)	F: 62.8 (9.9) M: 63.2 (10.1)		469	205 (43.7)	F: 66.1 (9.5) M: 66.0 (9.6)
NCCCSII	North Carolina Colon Cancer Study, II	case-control	USA	Illumina Oncoarray+custom iSelect	1281	0	0 (-)	F: - M: -		270	116 (43.0)	F: 63.5 (10.1) M: 63.6 (10.5)		316	120 (38.0)	F: 61.8 (10.7) M: 62.3 (10.1)		279	121 (43.4)	F: 63.7 (10.1) M: 63.7 (10.6)		586	236 (40.3)	F: 62.6 (10.4) M: 62.9 (10.3)		686	259 (37.8)	F: 63.3 (10.7) M: 64.6 (9.1)
NFCCR	Newfoundland Case-Control Study	case-control	Canada	Affymetrix Axiom	660	70	39 (55.7)	F: 61.5 (8.0) M: 62.7 (8.4)		60	18 (30.0)	F: 57.9 (8.2) M: 62.8 (7.0)		63	16 (25.4)	F: 58.8 (9.9) M: 62.3 (9.8)		130	57 (43.8)	F: 60.4 (8.2) M: 62.8 (7.6)		123	34 (27.6)	F: 58.4 (8.9) M: 62.6 (8.5)		467	197 (42.2)	F: 58.1 (8.5) M: 60.2 (9.2)
NGCCS	PopGen Biobank	case-control	Germany	Illumina Oncoarray	988	210	94 (44.8)	F: 58.6 (9.5) M: 60.7 (8.7)		151	82 (54.3)	F: 59.3 (7.2) M: 59.9 (8.3)		473	195 (41.2)	F: 57.5 (10.0) M: 61.0 (7.9)		515	238 (46.2)	F: 59.1 (8.5) M: 60.9 (8.7)		624	277 (44.4)	F: 58.0 (9.2) M: 60.8 (8.0)		0	0 (-)	F: - M: -
NHS_1	Nurses’ Health Study	cohort	USA	Illumina OmniExpress	1161	175	175 (100.0)	F: 67.3 (9.1) M: -		123	123 (100.0)	F: 63.2 (9.6) M: -		82	82 (100.0)	F: 63.1 (8.5) M: -		305	305 (100.0)	F: 65.5 (9.6) M: -		205	205 (100.0)	F: 63.2 (9.1) M: -		774	774 (100.0)	F: 60.0 (6.5) M: -
NHS_2	Nurses’ Health Study	cohort	USA	Illumina OmniExpress	328	67	67 (100.0)	F: 67.6 (8.3) M: -		44	44 (100.0)	F: 64.3 (9.2) M: -		35	35 (100.0)	F: 65.5 (7.4) M: -		112	112 (100.0)	F: 66.2 (8.7) M: -		79	79 (100.0)	F: 64.8 (8.4) M: -		181	181 (100.0)	F: 59.5 (6.3) M: -
NHS_4	Nurses’ Health Study	cohort	USA	Illumina OmniExpressExome	603	162	162 (100.0)	F: 71.3 (8.6) M: -		69	69 (100.0)	F: 67.3 (10.2) M: -		69	69 (100.0)	F: 69.3 (9.1) M: -		231	231 (100.0)	F: 70.1 (9.3) M: -		138	138 (100.0)	F: 68.3 (9.7) M: -		303	303 (100.0)	F: 69.4 (8.8) M: -
NHS_5_AD	Nurses’ Health Study	cohort	USA	Illumina Oncoarray+custom iSelect	226	0	0 (-)	F: - M: -		0	0 (-)	F: - M: -		0	0 (-)	F: - M: -		0	0 (-)	F: - M: -		0	0 (-)	F: - M: -		226	226 (100.0)	F: 66.5 (7.8) M: -
NHSII	Nurses’ Health Study	cohort	USA	Illumina Oncoarray	80	0	0 (-)	F: - M: -		0	0 (-)	F: - M: -		0	0 (-)	F: - M: -		0	0 (-)	F: - M: -		0	0 (-)	F: - M: -		80	80 (100.0)	F: 37.2 (4.0) M: -
NSHDS	The Northern Sweden Health and Disease Study	cohort	Sweden	Illumina Oncoarray+custom iSelect	413	0	0 (-)	F: - M: -		0	0 (-)	F: - M: -		0	0 (-)	F: - M: -		0	0 (-)	F: - M: -		0	0 (-)	F: - M: -		413	265 (64.2)	F: 57.6 (7.9) M: 53.3 (7.4)
OFCCR	Ontario Familial Colorectal Cancer Registry	case-control	Canada	Affymetrix 500K	1098	203	128 (63.1)	F: 63.2 (7.6) M: 61.3 (9.3)		162	93 (57.4)	F: 60.9 (6.7) M: 62.4 (6.4)		184	95 (51.6)	F: 61.0 (7.8) M: 61.3 (8.5)		392	248 (63.3)	F: 62.0 (7.3) M: 61.8 (8.0)		346	188 (54.3)	F: 60.9 (7.2) M: 61.8 (7.6)		522	227 (43.5)	F: 62.3 (8.1) M: 63.0 (7.5)
OSUMC	Columbus-area HNPCC study, Ohio Colorectal Cancer Prevention Initiative, Ohio State University Medical Center	case-control	USA	Illumina Oncoarray+custom iSelect	5526	1089	571 (52.4)	F: 65.8 (12.1) M: 63.8 (13.0)		793	345 (43.5)	F: 60.5 (13.2) M: 61.8 (12.6)		986	399 (40.5)	F: 59.0 (13.6) M: 58.9 (12.2)		2107	1028 (48.8)	F: 63.7 (12.9) M: 62.8 (13.0)		1779	744 (41.8)	F: 59.7 (13.4) M: 60.2 (12.5)		2433	1472 (60.5)	F: 51.1 (15.0) M: 53.3 (14.4)
PHS	Physicians’ Health Study	cohort	USA	Illumina OmniExpress	759	122	0 (0.0)	F: - M: 72.1 (10.0)		121	0 (0.0)	F: NaN (NA) M: 69.4 (8.7)		84	0 (0.0)	F: - M: 68.0 (10.4)		286	0 (0.0)	F: - M: 71.3 (9.3)		205	0 (0.0)	F: - M: 68.8 (9.4)		389	0 (0.0)	F: - M: 58.6 (8.9)
PLCO_1	Prostate, Lung, Colorectal, and Ovarian Cancer Screening Trial	cohort	USA	Illumina 300/240S & 610K	2484	316	151 (47.8)	F: 69.3 (5.7) M: 70.0 (5.4)		191	71 (37.2)	F: 67.7 (6.2) M: 67.4 (5.8)		5	1 (20.0)	F: 55.0 (NA) M: 71.2 (2.9)		507	222 (43.8)	F: 68.8 (5.9) M: 68.9 (5.7)		196	72 (36.7)	F: 67.5 (6.4) M: 67.6 (5.7)		1972	436 (22.1)	F: 63.5 (5.0) M: 64.1 (5.1)
PLCO_2	Prostate, Lung, Colorectal, and Ovarian Cancer Screening Trial	cohort	USA	Illumina 300K	884	209	107 (51.2)	F: 72.1 (6.2) M: 73.4 (5.9)		100	43 (43.0)	F: 70.8 (6.9) M: 70.1 (7.0)		156	50 (32.1)	F: 67.3 (5.6) M: 67.6 (6.4)		314	152 (48.4)	F: 71.7 (6.4) M: 72.3 (6.5)		256	93 (36.3)	F: 68.9 (6.4) M: 68.5 (6.7)		414	175 (42.3)	F: 63.7 (5.1) M: 63.5 (5.3)
PLCO_4_AD	Prostate, Lung, Colorectal, and Ovarian Cancer Screening Trial	cohort	USA	Illumina Oncoarray+custom iSelect	1308	0	0 (-)	F: - M: -		0	0 (-)	F: - M: -		0	0 (-)	F: - M: -		0	0 (-)	F: - M: -		0	0 (-)	F: - M: -		1308	737 (56.3)	F: 61.9 (5.3) M: 61.9 (5.3)
PMH-SCCFR	Postmenopausal Hormones Supplementary Study to the Seattle Colon Cancer Family Registry	case-control	USA	Illumina 300K	388	129	129 (100.0)	F: 65.3 (6.3) M: -		71	71 (100.0)	F: 64.7 (7.2) M: -		64	64 (100.0)	F: 62.8 (7.7) M: -		202	202 (100.0)	F: 65.0 (6.6) M: -		135	135 (100.0)	F: 63.8 (7.4) M: -		122	122 (100.0)	F: 61.6 (7.5) M: -
SEARCH	Studies of Epidemiology and Risk Factors in Cancer Heredity	case-control	UK	Illumina Oncoarray	4241	1043	490 (47.0)	F: 60.0 (7.9) M: 60.2 (8.5)		1168	536 (45.9)	F: 59.1 (8.0) M: 60.4 (7.4)		1829	697 (38.1)	F: 58.2 (8.5) M: 60.2 (7.2)		2297	1064 (46.3)	F: 59.5 (8.0) M: 60.2 (7.9)		2997	1233 (41.1)	F: 58.5 (8.3) M: 60.2 (7.3)		115	46 (40.0)	F: 53.6 (7.3) M: 55.5 (7.0)
SELECT	Selenium and Vitamin E Prevention Trial	clinical trial	USA	Illumina Oncoarray+custom iSelect	269	0	0 (-)	F: - M: -		0	0 (-)	F: - M: -		0	0 (-)	F: - M: -		0	0 (-)	F: - M: -		0	0 (-)	F: - M: -		269	0 (0.0)	F: - M: 65.8 (6.6)
SLRCCS	Swedish Low-Risk Colorectal Cancer Study	cohort	Sweden	Illumina Oncoarray	4531	723	386 (53.4)	F: 71.3 (10.0) M: 70.1 (11.3)		623	297 (47.7)	F: 66.7 (11.7) M: 69.7 (10.5)		904	346 (38.3)	F: 66.0 (10.8) M: 66.6 (9.6)		1346	683 (50.7)	F: 69.3 (11.0) M: 69.9 (10.9)		1527	643 (42.1)	F: 66.3 (11.2) M: 67.8 (10.1)		2281	1085 (47.6)	F: 61.7 (0.0) M: 61.7 (0.0)
SMC_COSM	Swedish Mammography Cohort and Cohort of Swedish Men	cohort	Sweden	Illumina Oncoarray	1390	170	76 (44.7)	F: 72.5 (9.8) M: 73.4 (8.4)		142	57 (40.1)	F: 68.3 (10.5) M: 70.6 (8.9)		203	78 (38.4)	F: 66.7 (8.5) M: 72.3 (8.6)		356	153 (43.0)	F: 70.1 (10.3) M: 72.1 (8.5)		345	135 (39.1)	F: 67.4 (9.4) M: 71.6 (8.7)		831	348 (41.9)	F: 63.7 (8.2) M: 63.8 (8.1)
SMS_AD	Screening Markers for Colorectal Cancer Study (advanced adenomas)	case-control	USA	Illumina Oncoarray+custom iSelect	130	0	0 (-)	F: - M: -		0	0 (-)	F: - M: -		0	0 (-)	F: - M: -		0	0 (-)	F: - M: -		0	0 (-)	F: - M: -		130	73 (56.2)	F: 58.9 (11.3) M: 62.5 (11.2)
UKB_1	UK Biobank	cohort	UK	UK Biobank Axiom	26735	1290	614 (47.6)	F: 61.6 (8.9) M: 61.9 (8.6)		1497	663 (44.3)	F: 59.3 (8.7) M: 62.0 (7.1)		2062	776 (37.6)	F: 58.6 (8.5) M: 60.5 (7.9)		3266	1489 (45.6)	F: 60.3 (8.7) M: 61.6 (8.1)		3559	1439 (40.4)	F: 58.9 (8.6) M: 61.1 (7.6)		21407	9084 (42.4)	F: 59.3 (7.2) M: 60.4 (6.7)
USC_HRT_CRC	Los Angeles County Cancer Surveillance Program	case-control	USA	Illumina Oncoarray	705	150	150 (100.0)	F: 66.9 (5.1) M: -		113	113 (100.0)	F: 65.7 (6.0) M: -		9	9 (100.0)	F: 68.6 (3.8) M: -		309	309 (100.0)	F: 66.4 (5.5) M: -		122	122 (100.0)	F: 65.9 (5.9) M: -		387	387 (100.0)	F: 64.9 (6.8) M: -
VITAL	VITamins And Lifestyle	cohort	USA	Illumina 300K	562	141	71 (50.4)	F: 70.7 (5.8) M: 70.5 (6.7)		67	32 (47.8)	F: 70.5 (6.5) M: 68.5 (6.6)		65	24 (36.9)	F: 69.0 (7.9) M: 67.9 (7.1)		211	105 (49.8)	F: 70.5 (6.0) M: 69.8 (6.7)		132	56 (42.4)	F: 69.8 (7.1) M: 68.2 (6.8)		286	138 (48.3)	F: 67.2 (6.1) M: 66.0 (6.4)
WHI_1	Women’s Health Initiative Study	cohort	USA	Illumina 550K, 550Kduo, 610K	1988	307	307 (100.0)	F: 71.8 (6.8) M: -		143	143 (100.0)	F: 70.0 (7.4) M: -		14	14 (100.0)	F: 67.6 (8.3) M: -		451	451 (100.0)	F: 71.3 (7.1) M: -		157	157 (100.0)	F: 69.8 (7.5) M: -		1523	1523 (100.0)	F: 69.5 (6.4) M: -
WHI_2	Women’s Health Initiative Study	cohort	USA	Illumina 300K	1933	464	464 (100.0)	F: 73.2 (7.2) M: -		218	218 (100.0)	F: 70.9 (7.1) M: -		245	245 (100.0)	F: 70.3 (7.1) M: -		682	682 (100.0)	F: 72.5 (7.3) M: -		463	463 (100.0)	F: 70.6 (7.1) M: -		1006	1006 (100.0)	F: 65.6 (6.2) M: -
WHI_3	Women’s Health Initiative Study	cohort	USA	Illumina Oncoarray+custom iSelect	1053	332	332 (100.0)	F: 79.0 (6.4) M: -		76	76 (100.0)	F: 77.9 (6.3) M: -		72	72 (100.0)	F: 76.0 (8.1) M: -		422	422 (100.0)	F: 78.8 (6.5) M: -		148	148 (100.0)	F: 76.9 (7.3) M: -		559	559 (100.0)	F: 64.4 (6.3) M: -
Details of case subgroup definitions including ICD-9 codes are given in the Methods section. SD, standard deviation. F, females. M, males.
aColon: proximal colon + distal colon + colon, unspecified site cancer cases.
bDistal colorectal: distal colon + rectal cancer cases.
cMatching controls were selected from the Nutrition Questionnaires plus (NQplus) prospective cohort study, a longitudinal observational study on diet and health in the general Dutch population.

## Sheet: Suppl. Table 2
Supplementary Table 2. Tumor subsite risk models.
Category	Tumor site	Model	Risk effect parameters
			Proximal colon	Distal colon	Rectum	Control
One site risk models	Proximal colon	S1_P	a1	a0	a0	a0
	Distal colon	S1_D	a0	a1	a0	a0
	Rectum	S1_R	a0	a0	a1	a0
Two sites risk models	Proximal colon & distal colon	S2_PD	a1	a1	a0	a0
		S2_PD_HET	a1	b1	a0	a0
	Proximal colon & rectum	S2_PR	a1	a0	a1	a0
		S2_PR_HET	a1	a0	b1	a0
	Distal colon & rectum	S2_DR	a0	a1	a1	a0
		S2_DR_HET	a0	a1	b1	a0
Three sites risk models	Proximal colon, distal colon & rectum	S3_PDR	a1	a1	a1	a0
		S3_PDR_HET	a1	b1	g1	a0
For each of the three primary tumor subsites and the control group, risk effect parameters were estimated using multinomial logistic regression. Risk effects were either allowed to vary across groups or were constrained to be the same. A likelihood ratio test comparing models S3_PDR_HET and S3_PDR provides a test for heterogeneity of effects across tumor sites.

## Sheet: Suppl. Table 3
Supplementary Table 3. Association results by primary tumor anatomic subsite and multinomial modeling analysis results for the lead SNPs of the new genome-wide significant CRC risk loci.
Locus	Nearby gene(s)	rsID	Tumor site	Chrom.	Build37	Alleles (risk/other)	RAF	OR	CI	P	Phet	Best model (BIC)
1p31.1	PTGER3	rs3124454	Proximal colon	1	71040166	G/T	0.5809	1.09	(1.06-1.12)	9.8e-09	1.1e-05	S2_PD
			Distal colon					1.05	(1.02-1.08)	0.00059
			Rectal					1.01	(0.98-1.04)	0.58
2q21.3	LCT	rs1446585	Proximal colon	2	136407479	G/A	0.399	1.03	(1.00-1.07)	0.037	0.0058	S2_DR
			Distal colon					1.07	(1.04-1.11)	8.3e-06
			Rectal					1.07	(1.03-1.10)	3.7e-05
3p22.2	MLH1	rs1800734	Proximal colon	3	37034946	A/G	0.247	1.15	(1.11-1.19)	6.5e-18	5.4e-19	S1_P
			Distal colon					0.99	(0.96-1.03)	0.69
			Rectal					0.97	(0.94-1.01)	0.1
3p21.2	STAB1; TLR9; NISCH	rs353548	Proximal colon	3	52269491	G/A	0.9533	1.13	(1.06-1.21)	0.00012	0.039	S2_PD
			Distal colon					1.18	(1.11-1.27)	5.3e-07
			Rectal					1.06	(0.99-1.13)	0.077
5q32	CDX1	rs2302274	Proximal colon	5	149546426	G/A	0.4782	1.02	(1.00-1.05)	0.079	0.0023	S2_DR
			Distal colon					1.07	(1.04-1.10)	5.3e-06
			Rectal					1.07	(1.04-1.10)	2.2e-06
7q32.3	KLF14; LINC00513	rs73161913	Proximal colon	7	130607779	G/A	0.9432	1.04	(0.98-1.10)	0.19	0.0051	S2_DR
			Distal colon					1.18	(1.11-1.26)	2.4e-07
			Rectal					1.15	(1.08-1.22)	6.4e-06
10q23.31	PANK1; KIF20B	rs7071258	Proximal colon	10	91574624	A/G	0.2156	1.03	(0.99-1.06)	0.13	0.018	S2_DR
			Distal colon					1.08	(1.05-1.12)	9.5e-07
			Rectal					1.07	(1.04-1.11)	2e-05
14q22.1	PYGL; NIN; ABHD12B	rs28611105	Proximal colon	14	51359658	G/T	0.2146	1.02	(0.98-1.05)	0.34	0.00014	S2_DR, S1_R
			Distal colon					1.05	(1.02-1.09)	0.003
			Rectal					1.11	(1.07-1.15)	2.4e-09
14q32.12	RIN3	rs61975764	Proximal colon	14	93014929	G/A	0.5533	1.08	(1.05-1.11)	4.6e-08	0.024	S3_PDR, S2_PR, S1_P
			Distal colon					1.03	(1.00-1.06)	0.062
			Rectal					1.04	(1.01-1.07)	0.0043
14q32.2	BCL11B	rs80158569	Proximal colon	14	99782937	A/G	0.0747	1.18	(1.12-1.24)	1.4e-10	1.5e-05	S1_P
			Distal colon					1.04	(0.98-1.09)	0.2
			Rectal					1.03	(0.98-1.09)	0.25
19p13.3	STK11; SBNO2	rs62131228	Proximal colon	19	1157642	G/A	0.9808	1.14	(1.02-1.27)	0.022	0.14	S3_PDR
			Distal colon					1.27	(1.13-1.43)	5.4e-05
			Rectal					1.27	(1.13-1.42)	3.7e-05
20q13.31	BMP7	rs6014965	Proximal colon	20	55831203	A/G	0.5536	1.02	(0.99-1.05)	0.13	0.0037	S2_DR
			Distal colon					1.08	(1.05-1.11)	8.8e-08
			Rectal					1.05	(1.03-1.08)	0.00011
22q13.31	FAM118A; FBLN1	rs736037	Proximal colon	22	45724999	A/G	0.2861	1.05	(1.02-1.09)	0.00056	0.063	S2_PD, S3_PDR
			Distal colon					1.08	(1.04-1.11)	2e-06
			Rectal					1.03	(1.00-1.07)	0.025
Reference SNP cluster ID (rsID) based on NCBI dbSNP Build 152. Alleles are on the + strand. Chrom., chromosome; RAF, risk allele frequency; OR, odds (log-additive) ratio estimate for the risk allele; 95% CI, 95% confidence interval. All P-values reported in this table are based on a sample size-weighted fixed-effects meta-analysis of logistic regression-based likelihood-ratio test results. Phet i…

## Sheet: Suppl. Table 5
Supplementary Table 5. Functional and regulatory genomic annotations of lead variants and their linkage disequilibrium proxies (r2 >0.80) for the 13 new association signals. Details are in the Supplementary Materials.
								Active enhancer signal overlap in colorectal tissue			DNA accessibility in colorectal tissue				Regulatory genomic annotation overlap in diverse tissues (Finucane et al.)											Transcription factors			Deleteriousness scores				Expression-based gene linking (GTEx V8)
Locus	rsID lead variant	Annotated variant	rsID annotated variant	Chromosome	Position (build 37)	Functional consequence	Gene symbol	Normal crypt H3K27ac peak (n=4)	CRC cell line H3K27ac peak (n=31)		Normal crypt DHS (n=3)	Normal mucosa ATAC-seq (n=4)	CRC primary tumor DHS (n=3)		Adrenal or pancreas	CNS	Cardio-vascular	Connective or bone	Gastro-intestinal	Immune or hematopoietic	Kidney	Liver	Skeletal muscle	Other		Predicted TFBS motifs	ENCODE TF ChIP-seqa		CADD (Phred)	DANN score	PolyPhen2		Transverse colon	All tissues (n tissues)
1p31.1	rs3124454	1-71035970-G-T	rs4129005	1	71035970	-	-	no	no		no	no	no		no	no	no	no	no	no	no	no	no	no		ERalpha-a, TATA	-		3.797	-	-		-	PTGER3 (5 tissues); RP3-333A15.2 (2 tissues); ZRANB2-AS2 (1 tissue)
		1-71040166-G-T	rs3124454	1	71040166	-	-	no	no		no	no	no		no	no	no	no	no	no	no	no	no	no		SP1	-		2.348	-	-		-	PTGER3 (7 tissues); RP3-333A15.2 (2 tissues)
2q21.3	rs1446585	2-135837906-C-A	rs7570971	2	135837906	intron_variant	RAB3GAP1	no	no		no	no	no		no	no	no	no	no	no	no	no	no	no		Arid3a, Cdx2, Dlx2, E2F, Hoxa10, Hoxa3, Hoxa5, Hoxa7, Hoxb13, Hoxb6, Hoxb9, Hoxc6, Hoxc9, Msx-1, Nkx2, Nkx6-1, Pou2f2, Pou4f3	-		0.534	-	-		-	CCNT2 (5 tissues); DARS (5 tissues); DARS-AS1 (10 tissues); MAP3K19 (1 tissue); MCM6 (18 tissues); TMEM163 (9 tissues); UBXN4 (4 tissues)
		2-135907088-A-G	rs6730157	2	135907088	intron_variant	RAB3GAP1	no	no		no	no	no		yes	no	yes	no	yes	no	no	no	no	no		GR, Rad21, SIX5, Znf143	CEBPB, FOS, MYC		0.141	-	-		-	CCNT2 (5 tissues); DARS (5 tissues); DARS-AS1 (11 tissues); MAP3K19 (1 tissue); MCM6 (16 tissues); TMEM163 (8 tissues); UBXN4 (4 tissues)
		2-135954797-T-C	rs1375131	2	135954797	3_prime_UTR_variant	ZRANB3	no	no		no	no	no		no	no	no	no	no	no	no	no	no	no		Cart1, DMRT7, Dbx1, Foxj1, Foxp1, HNF1, Hlx1, Lhx3, Mef2, Ncx, Pou6f1, Sox, TATA, TEF	-		8.287	-	-		-	CCNT2 (5 tissues); DARS (5 tissues); DARS-AS1 (11 tissues); MAP3K19 (1 tissue); MCM6 (17 tissues); TMEM163 (8 tissues); UBXN4 (4 tissues)
		2-136092061-C-A	rs1561277	2	136092061	intron_variant	ZRANB3	no	no		no	no	no		no	no	no	no	no	no	no	no	no	no		AP-1, Nanog, Pou2f2, Pou5f1, TATA	-		3.488	-	-		MCM6	CCNT2 (5 tissues); CCNT2-AS1 (1 tissue); DARS (5 tissues); DARS-AS1 (8 tissues); MAP3K19 (1 tissue); MCM6 (17 tissues); TMEM163 (8 tissues); UBXN4 (4 tissues); VDAC2P4 (1 tissue); ZRANB3 (2 tissues)
		2-136322676-G-T	rs6759321	2	136322676	intron_variant	R3HDM1	no	no		no	no	no		no	no	no	no	no	no	no	no	no	no		Foxj2, TCF4	-		3.458	-	-		MCM6	CCNT2 (5 tissues); CCNT2-AS1 (1 tissue); DARS (5 tissues); DARS-AS1 (8 tissues); MAP3K19 (1 tissue); MCM6 (17 tissues); TMEM163 (8 tissues); UBXN4 (4 tissues); VDAC2P4 (1 tissue); ZRANB3 (1 tissue)
		2-136381348-G-A	rs12465802	2	136381348	intron_variant	R3HDM1	no	no		no	no	no		no	no	no	no	no	no	no	no	no	no		ATF2, Foxp3, Nr2f2	-		0.987	-	-		-	CCNT2 (5 tissues); DARS (5 tissues); DARS-AS1 (10 tissues); MAP3K19 (1 tissue); MCM6 (16 tissues); TMEM163 (9 tissues); UBXN4 (4 tissues)
		2-136407479-A-G	rs1446585	2	136407479	intron_variant	R3HDM1	no	no		no	no	no		no	no	no	no	no	no	no	no	no	no		-	-		21	-	-		-	CCNT2 (5 tissues); DARS (5 tissues); DARS-AS1 (8 tissues); MAP3K19 (1 tissue); MCM6 (17 tissues); TMEM163 (6 tissues); UBXN4 (4 tissues); ZRANB3 (1 tissue)
		2-136608646-G-A	rs4988235	2	136608646	intron_variant	MCM6	no	no		no	no	no		no	yes	no	no	no	yes	no	no	no	no		INSM1	RXRA		13.46	-	-		DARS	CCNT2 (3 tissues); DARS (7 tissues); DARS-AS1 (9 tissues); MAP3K19 (1 tissue); MCM6 (18 tissues); UBXN4 (4 tissues)
		2-136616754-C-T	rs182549	2	136616754	intron_variant	MCM6	no	no		no	no	no		no	yes	no	no	no	no	no	no	no	no		BHLHE40, ELF1, Egr-1, Ets, NRSF, YY1, Zfp161	-		0.212	-	-		DARS	CCNT2 (3 tissues); DARS (6 tissues); DARS-AS1 (11 tissues); MAP3K19 (1 tissue); MCM6 (17 tissues); UBXN4 (4 tissues)
		2-136707982-T-C	rs6754311	2	136707982	intron_variant	DARS	no	yes (7)		no	no	no		yes	yes	yes	no	yes	yes	no	no	no	yes		CDP, Hoxa5	-		6.25	-	-		DARS	DARS (8 tissues); DARS-AS1 (10 tissues); MAP3K19 (1 tissue); MCM6 (18 tissues); UBXN4 (3 tissues); ZRANB3 (1 tissue)
3p22.2	rs1800734	3-37034946-G-A	rs1800734	3	37034946	5_prime_UTR_variant	MLH1	yes (4)	yes (29)		yes (3)	yes (4)	no		yes	yes	yes	yes	yes	yes	yes	yes	yes	yes		BHLHE40	RBBP5, POLR2A (HCT-116), HDAC1, EP300, PHF8, KDM5B, SAP30, ATF3, CREB1, ELF1, ETS1, GABPA, SIN3AK20, SIX5, TAF1, USF1, YY1 (HCT-116), ZBTB33 (HCT-116), ATF2, CEBPB, EBF1, FOXM1, NFIC, PBX3, POU2F2, SPI1, SP1, JUND, SP2, TEAD4, BHLHE40, MYBL2, CBX3, E2F6, MAX, TRIM28, RELA, BRCA1, FOS, CHD2, E2F4, ELK1, MAZ, MXI1, NFYA, NFYB, RFX5, SIN3A, SMC3, STAT1, STAT3, TBL1XR1, TBP, USF2, JUN, MYC, TCF7L2 (H…		9.959	-	-		RP11-129K12.1	EPM2AIP1 (6 tissues); GOLGA4 (1 tissue); LRRFIP2 (9 tissues); MLH1 (14 tissues); PRADC1P1 (1 tissue); RP11-129K12.1 (9 tissues); RP11-285J16.1 (2 tissues)
		3-37096024-T-C	rs749072	3	37096024	intron_variant; intron_variant	MLH1; LRRFIP2	yes (3)	yes (5)		yes (2)	yes (1)	no		yes	yes	yes	yes	yes	yes	no	no	yes	yes		GR	POLR2A (HCT-116), ATF2, BCL11A, MEF2C, NFIC, FOSL1, JUND, FOS, SMC3, JUN, JUNB		1.967	-	-		RP11-129K12.1	EPM2AIP1 (3 tissues); GOLGA4 (2 tissues); LRRFIP2 (10 tissues); MLH1 (11 tissues); PRADC1P1 (1 tissue); RP11-129K12.1 (9 tissues); RP11-285J16.1 (1 tissue); TRANK1 (1 tissue)
		3-37232458-G-A	rs13098279	3	37232458	-	-	no	no		no	no	no		no	no	no	no	no	yes	no	no	no	no		-	TEAD4, GATA2, NR2F2, RCOR1, BRF2, TAL1		7.549	-	-		RP11-129K12.1	EPM2AIP1 (7 tissues); GOLGA4 (1 tissue); LRRFIP2 (10 tissues); MLH1 (13 tissues); MYD88 (1 tissue); PRADC1P1 (1 tissue); RP11-129K12.1 (10 tissues)
3p21.2	rs353548	3-52213653-T-C	rs352155	3	52213653	-	-	no	no		no	no	no		no	yes	no	no	no	no	no	no	no	no		Myf, SIX5	-		1.791	-	-		-	GLYCTK (1 tissue); ITIH4 (1 tissue); NISCH (2 tissues); NT5DC2 (1 tissue); PPM1M (1 tissue); STAB1 (3 tissues); TLR9 (1 tissue); TWF2 (1 tissue)
		3-52214610-C-T	rs352156	3	52214610	-	-	no	no		no	no	no		no	no	no	no	no	yes	no	yes	no	yes		AP-1, Evi-1, Mef2, PTF1-beta	-		8.876	-	-		-	BAP1 (1 tissue); GNL3 (3 tissues); ITIH4 (2 tissues); NISCH (3 tissues); NT5DC2 (1 tissue); RP5-966M1.7 (1 tissue); STAB1 (4 tissues); TLR9 (2 tissues)
		3-52220483-T-C	rs352159	3	52220483	-	-	no	no		no	no	no		no	no	no	no	yes	yes	no	yes	no	no		CDP, CHX10, Cart1, Evi-1, Foxp1, Hoxa4, Maf, Pax7, Pitx2, Pou2f2, Pou6f1, Prrx2, Sox	-		0.935	-	-		-	BAP1 (1 tissue); GLYCTK (2 tissues); GNL3 (1 tissue); ITIH4 (2 tissues); NISCH (3 tissues); NT5DC2 (1 tissue); RP5-966M1.7 (1 tissue); STAB1 (4 tissues); TLR9 (2 tissues)
		3-52221092-C-T	rs352160	3	52221092	-	-	no	no		no	no	no		no	no	no	no	yes	yes	no	yes	no	no		ATF3, CHD2, E2F, Egr-1, Ets, NRSF, Nrf1, Sin3Ak-20, YY1, Zfp161, p300	-		7.546	-	-		-	BAP1 (1 tissue); DNAH1 (1 tissue); GLYCTK (2 tissues); GNL3 (1 tissue); ITIH4 (2 tissues); NISCH (2 tissues); NT5DC2 (1 tissue); RP5-966M1.7 (1 tissue); STAB1 (4 tissues); TLR9 (2 tissues)
		3-52229095-C-G	rs352173	3	52229095	upstream_gene_variant	ALAS1	no	yes (5)		no	no	no		yes	no	yes	no	yes	yes	no	no	no	no		-	-		15.95	-	-		-	BAP1 (1 tissue); GLYCTK (4 tissues); GNL3 (1 tissue); ITIH4 (3 tissues); NISCH (2 tissues); NT5DC2 (1 tissue); RP5-966M1.7 (1 tissue); STAB1 (4 tissues); TLR9 (2 tissues)
		3-52230440-A-C	rs104902	3	52230440	upstream_gene_variant	ALAS1	yes (4)	yes (22)		no	no	no		yes	yes	yes	yes	yes	yes	no	no	no	yes		CIZ, Glis2, INSM1, Ik-1, RREB-1, SREBP, ZBTB7A	-		0.001	-	-		-	BAP1 (1 tissue); GLYCTK (2 tissues); GNL3 (2 tissues); ITIH4 (4 tissues); NISCH (2 tissues); NT5DC2 (1 tissue); STAB1 (4 tissues); TLR9 (3 tissues); TMEM110 (1 tissue); TNNC1 (1 tissue)
		3-52241229-T-C	rs164641	3	52241229	intron_variant	ALAS1	no	yes (1)		no	no	no		yes	no	no	no	no	yes	no	yes	no	no		STAT	-		3.672	-	-		-	BAP1 (1 tissue); GLYCTK (3 tissues); GNL3 (1 tissue); ITIH4 (1 tissue); NISCH (1 tissue); NT5DC2 (1 tissue); SFMBT1 (1 tissue); STAB1 (4 tissues); TLR9 (3 tissues); TNNC1 (1 tissue)
		3-52261468-T-G	rs352144	3	52261468	intron_variant	TLR9	no	yes (1)		no	no	no		no	no	no	no	no	yes	no	no	no	yes		THAP1	CTCF (HCT-116)		5.349	-	-		-	BAP1 (2 tissues); DNAH1 (1 tissue); GLYCTK (2 tissues); GNL3 (2 tissues); ITIH4 (3 tissues); NISCH (2 tissues); NT5DC2 (1 tissue); RP11-894J14.2 (1 tissue); STAB1 (6 tissues); TLR9 (3 tissues); TNNC1 (1 tissue)
		3-52265215-G-A	rs164637	3	52265215	5_prime_UTR_variant; synonymous_variant	TLR9; TWF2	no	yes (1)		yes (1)	no	no		no	yes	no	yes	no	yes	no	yes	yes	yes		E2A, Lmo2-complex, Myf, RP58, STAT, TAL1, ZBRK1, ZEB1	-		14.67	-	-		-	BAP1 (2 tissues); GLYCTK (1 tissue); GNL3 (2 tissues); ITIH4 (3 tissues); ITIH4-AS1 (1 tissue); NISCH (4 tissues); NT5DC2 (1 tissue); RP5-966M1.7 (1 tissue); STAB1 (7 tissues); TLR9 (3 tissues); TNNC1 (2 tissues)
		3-52265259-G-C	rs164636	3	52265259	intron_variant; intron_variant	TLR9; TWF2	no	yes (1)		yes (1)	no	no		no	yes	no	yes	no	yes	no	yes	yes	yes		CAC-binding-protein, CACD, CCNT2, Egr-1, Klf4, Klf7, MZF1::1-4, Myc, Pax-4, Pou2f2, Rad21, SP1, STAT, UF1H3BETA, ZNF219, Zfp281, Zfp740	-		5.634	-	-		-	BAP1 (2 tissues); GLYCTK (1 tissue); GNL3 (2 tissues); ITIH4 (3 tissues); ITIH4-AS1 (1 tissue); NISCH (4 tissues); NT5DC2 (1 tissue); RP5-966M1.7 (1 tissue); STAB1 (7 tissues); TLR9 (3 tissues); TNNC1 (3 tissues)
		3-52267118-G-C	rs352141	3	52267118	intron_variant; intron_variant	TLR9; TWF2	no	yes (1)		no	no	no		no	yes	yes	yes	yes	yes	no	yes	yes	yes		E2A	CTCF (HCT-116), RAD21		0.52	-	-		-	BAP1 (2 tissues); GLYCTK (2 tissues); GNL3 (2 tissues); ITIH4 (4 tissues); ITIH4-AS1 (1 tissue); NISCH (3 tissues); NT5DC2 (1 tissue); RP5-966M1.7 (1 tissue); STAB1 (8 tissues); TLR9 (3 tissues); TNNC1 (2 tissues)
		3-52267580-G-C	rs353545	3	52267580	intron_variant; intron_variant	TLR9; TWF2	no	yes (1)		no	no	no		no	yes	yes	yes	yes	yes	no	yes	yes	yes		NF-kappaB	-		3.25	-	-		-	BAP1 (2 tissues); GLYCTK (1 tissue); GNL3 (2 tissues); ITIH4 (3 tissues); ITIH4-AS1 (1 tissue); NISCH (4 tissues); NT5DC2 (1 tissue); RP5-966M1.7 (1 tissue); STAB1 (7 tissues); TLR9 (3 tissues); TNNC1 (3 tissues)
		3-52269491-A-G	rs353548	3	52269491	intron_variant; intron_variant	TLR9; TWF2	no	yes (2)		no	no	no		no	yes	yes	yes	yes	yes	no	yes	yes	yes		-	-		0.324	-	-		-	BAP1 (1 tissue); GLYCTK (2 tissues); GNL3 (2 tissues); ITIH4 (4 tissues); ITIH4-AS1 (1 tissue); NISCH (3 tissues); NT5DC2 (1 tissue); RP5-966M1.7 (1 tissue); STAB1 (9 tissues); TLR9 (3 tissues); TNNC1 (2 tissues)
		3-52286825-C-T	rs34551211	3	52286825	downstream_gene_variant	PPM1M; WDR82	no	yes (2)		no	no	no		no	yes	no	no	yes	yes	no	no	no	no		-	POLR2A		0.327	-	-		-	BAP1 (2 tissues); GLYCTK (1 tissue); GNL3 (2 tissues); ITIH4 (4 tissues); ITIH4-AS1 (1 tissue); NISCH (4 tissues); NT5DC2 (1 tissue); RP5-966M1.7 (1 tissue); STAB1 (7 tissues); TLR9 (3 tissues); TNNC1 (3 tissues)
		3-52298171-T-C	rs13093555	3	52298171	intron_variant	WDR82	no	no		no	no	no		no	yes	no	no	no	yes	no	no	no	no		RREB-1, TFII-I	-		3.32	-	-		-	BAP1 (2 tissues); GLYCTK (1 tissue); GNL3 (2 tissues); ITIH4 (4 tissues); ITIH4-AS1 (1 tissue); NISCH (4 tissues); NT5DC2 (1 tissue); RP5-966M1.7 (1 tissue); STAB1 (7 tissues); TLR9 (3 tissues); TNNC1 (3 tissues)
		3-52299737-G-A	rs34385735	3	52299737	intron_variant	WDR82	no	no		no	yes (1)	no		no	yes	no	no	no	yes	no	yes	no	yes		-	CTCF (Caco-2)		2.528	-	-		-	BAP1 (2 tissues); GLYCTK (1 tissue); GNL3 (2 tissues); ITIH4 (4 tissues); ITIH4-AS1 (1 tissue); NISCH (4 tissues); NT5DC2 (1 tissue); RP5-966M1.7 (1 tissue); STAB1 (7 tissues); TLR9 (3 tissues); TNNC1 (3 tissues)
		3-52314955-G-A	rs13098856	3	52314955	upstream_gene_variant	WDR82	yes (2)	yes (10)		no	no	no		no	yes	no	yes	yes	yes	no	no	yes	yes		ERalpha-a, Rad21, SMC3, ZBRK1	-		0.147	-	-		-	BAP1 (2 tissues); DNAH1 (1 tissue); GLYCTK (2 tissues); GNL3 (2 tissues); ITIH4 (3 tissues); ITIH4-AS1 (1 tissue); NISCH (4 tissues); NT5DC2 (1 tissue); SMIM4 (1 tissue); STAB1 (7 tissues); TLR9 (3 tissues); TNNC1 (2 tissues)
		3-52321788-C-T	rs13065677	3	52321788	intron_variant	GLYCTK	yes (4)	yes (31)		yes (3)	yes (3)	no		yes	yes	yes	yes	yes	yes	yes	yes	yes	yes		AP-2, BCL, CTCF, ELF1, HEY1, NRSF, Rad21, YY1	RBBP5, POLR2A (HCT-116), HDAC1, PHF8, ELF1, ETS1, GABPA, REST, SIN3AK20, SIX5, TAF1, TCF12, EGR1, FOXM1, PAX5, PML, POU2F2, SPI1, RUNX3, TCF3, TAF7, MAX, RELA, FOS, CHD2, MAZ, MXI1, NRF1, SIN3A, STAT1, TBL1XR1, MYC, ELK4, HMGN3		4.433	-	-		-	BAP1 (2 tissues); GLYCTK (2 tissues); GNL3 (2 tissues); ITIH4 (3 tissues); ITIH4-AS1 (1 tissue); NISCH (3 tissues); NT5DC2 (1 tissue); RP5-966M1.7 (1 tissue); SMIM4 (1 tissue); STAB1 (7 tissues); TLR9 (3 tissues); TNNC1 (3 tissues)
		3-52322680-G-A	rs13071708	3	52322680	intron_variant	GLYCTK	yes (4)	yes (26)		yes (1)	no	no		yes	yes	yes	yes	yes	yes	yes	yes	yes	yes		-	-		0.476	-	-		-	BAP1 (2 tissues); GLYCTK (2 tissues); GNL3 (2 tissues); ITIH4 (3 tissues); ITIH4-AS1 (1 tissue); NISCH (3 tissues); NT5DC2 (1 tissue); RP5-966M1.7 (1 tissue); SMIM4 (1 tissue); STAB1 (7 tissues); TLR9 (3 tissues); TNNC1 (3 tissues)
		3-52324165-C-T	rs3796342	3	52324165	intron_variant	GLYCTK	yes (4)	yes (21)		yes (3)	yes (4)	no		yes	no	no	yes	yes	yes	yes	yes	no	yes		Ascl2, LBP-1, Lmo2-complex, Rad21	POLR2A, HDAC2, EP300, ELF1, FOSL2, REST, SIN3AK20, TAF1, USF1, YY1, NFIC, RAD21, JUND, CEBPD, HNF4A, MYBL2, MAX, MXI1, SMC3, TBP, MYC		7.758	-	-		-	BAP1 (2 tissues); GLYCTK (2 tissues); GNL3 (2 tissues); ITIH4 (3 tissues); ITIH4-AS1 (1 tissue); NISCH (3 tissues); NT5DC2 (1 tissue); RP5-966M1.7 (1 tissue); SMIM4 (1 tissue); STAB1 (7 tissues); TLR9 (3 tissues); TNNC1 (3 tissues)
		3-52325106-C-G	rs35130772	3	52325106	missense_variant	GLYCTK	yes (4)	yes (18)		yes (1)	no	no		yes	no	no	yes	yes	yes	yes	yes	yes	yes		ATF3, CTCF, HIF1, Myf, NRSF, TCF12	-		22.7	0.996	possibly_damaging(0.869)		-	BAP1 (2 tissues); GLYCTK (2 tissues); GNL3 (2 tissues); ITIH4 (3 tissues); ITIH4-AS1 (1 tissue); NISCH (3 tissues); NT5DC2 (1 tissue); RP5-966M1.7 (1 tissue); SMIM4 (1 tissue); STAB1 (7 tissues); TLR9 (3 tissues); TNNC1 (3 tissues)
		3-52353119-G-T	rs34332947	3	52353119	intron_variant	DNAH1	no	no		no	no	no		no	no	no	no	no	no	no	no	yes	no		Foxa, HNF4, RREB-1	-		6.573	-	-		-	BAP1 (1 tissue); GLYCTK (1 tissue); GNL3 (2 tissues); ITIH4 (3 tissues); ITIH4-AS1 (1 tissue); NISCH (3 tissues); NT5DC2 (1 tissue); RP5-966M1.7 (1 tissue); SMIM4 (1 tissue); STAB1 (7 tissues); TLR9 (3 tissues); TNNC1 (3 tissues)
		3-52360647-G-A	rs34181173	3	52360647	intron_variant	DNAH1	no	no		no	no	no		no	no	no	yes	no	no	no	no	no	yes		BDP1, Irf, Klf7, STAT	-		6.919	-	-		-	BAP1 (1 tissue); GLYCTK (1 tissue); GNL3 (2 tissues); ITIH4 (3 tissues); ITIH4-AS1 (1 tissue); NISCH (3 tissues); NT5DC2 (1 tissue); RP5-966M1.7 (1 tissue); SMIM4 (1 tissue); STAB1 (8 tissues); TLR9 (3 tissues); TNNC1 (1 tissue)
		3-52362580-G-A	rs34628357	3	52362580	intron_variant	DNAH1	no	no		no	no	no		no	no	no	yes	no	yes	no	no	yes	no		Eomes, GATA, Pax-5, RREB-1, TBX5	-		0.095	-	-		-	BAP1 (1 tissue); GLYCTK (1 tissue); GNL3 (2 tissues); ITIH4 (3 tissues); ITIH4-AS1 (1 tissue); NISCH (3 tissues); NT5DC2 (1 tissue); RP5-966M1.7 (1 tissue); SMIM4 (1 tissue); STAB1 (7 tissues); TLR9 (3 tissues); TNNC1 (3 tissues)
		3-52376773-C-T	rs71297391	3	52376773	intron_variant	DNAH1	no	no		no	no	no		no	no	no	yes	no	yes	no	no	no	no		DEC, Nkx2, STAT	-		2.191	-	-		-	BAP1 (3 tissues); GLYCTK (1 tissue); GNL3 (2 tissues); ITIH4 (3 tissues); ITIH4-AS1 (1 tissue); NISCH (3 tissues); NT5DC2 (1 tissue); SMIM4 (1 tissue); STAB1 (9 tissues); TLR9 (3 tissues); TNNC1 (1 tissue)
		3-52378540-G-C	rs13060192	3	52378540	missense_variant	DNAH1	no	no		no	no	no		no	no	no	yes	no	no	no	no	no	no		Pax-6	-		21.1	0.993	benign(0.017)		-	BAP1 (1 tissue); GLYCTK (1 tissue); GNL3 (2 tissues); ITIH4 (3 tissues); ITIH4-AS1 (1 tissue); NISCH (2 tissues); NT5DC2 (1 tissue); RP5-966M1.7 (1 tissue); SMIM4 (1 tissue); STAB1 (9 tissues); TLR9 (2 tissues); TNNC1 (1 tissue)
		3-52383340-C-T	rs35982798	3	52383340	synonymous_variant	DNAH1	no	no		no	no	no		no	yes	no	yes	no	no	no	no	no	no		-	-		0.051	-	-		-	BAP1 (3 tissues); GLYCTK (1 tissue); GNL3 (2 tissues); ITIH4 (3 tissues); ITIH4-AS1 (1 tissue); NISCH (3 tissues); NT5DC2 (1 tissue); SMIM4 (1 tissue); STAB1 (9 tissues); TLR9 (3 tissues); TNNC1 (1 tissue)
		3-52390789-C-T	rs61734640	3	52390789	missense_variant	DNAH1	no	no		no	no	no		no	no	no	no	no	no	no	no	no	no		Ets	-		23.6	0.999	probably_damaging(0.948)		-	BAP1 (3 tissues); GLYCTK (1 tissue); GNL3 (2 tissues); ITIH4 (3 tissues); ITIH4-AS1 (1 tissue); NISCH (3 tissues); NT5DC2 (1 tissue); SMIM4 (1 tissue); STAB1 (9 tissues); TLR9 (3 tissues); TNNC1 (1 tissue)
		3-52393472-C-T	rs71297394	3	52393472	intron_variant	DNAH1	no	no		no	no	no		no	no	no	yes	no	no	no	no	no	yes		BDP1, Ets, PTF1-beta, Spz1	-		1.065	-	-		-	BAP1 (3 tissues); GLYCTK (1 tissue); GNL3 (2 tissues); ITIH4 (3 tissues); ITIH4-AS1 (1 tissue); NISCH (3 tissues); NT5DC2 (1 tissue); SMIM4 (1 tissue); STAB1 (9 tissues); TLR9 (3 tissues); TNNC1 (1 tissue)
		3-52401836-G-A	rs71297395	3	52401836	intron_variant	DNAH1	no	no		no	no	no		no	yes	no	no	no	no	no	no	no	no		CDP, Zfx	-		0.158	-	-		-	BAP1 (3 tissues); GLYCTK (1 tissue); GNL3 (2 tissues); ITIH4 (3 tissues); ITIH4-AS1 (1 tissue); NISCH (3 tissues); NT5DC2 (1 tissue); SMIM4 (1 tissue); STAB1 (9 tissues); TLR9 (3 tissues); TNNC1 (1 tissue)
		3-52407725-C-T	rs13096571	3	52407725	intron_variant	DNAH1	no	no		no	no	no		no	yes	yes	yes	yes	yes	no	no	no	yes		BRCA1, DMRT7, FAC1	-		2.231	-	-		-	BAP1 (1 tissue); GLYCTK (2 tissues); GNL3 (2 tissues); ITIH4 (4 tissues); ITIH4-AS1 (1 tissue); NISCH (3 tissues); NT5DC2 (1 tissue); RP5-966M1.7 (1 tissue); SMIM4 (1 tissue); STAB1 (7 tissues); TLR9 (3 tissues); TNNC1 (3 tissues)
		3-52407805-T-C	rs13076508	3	52407805	intron_variant	DNAH1	no	no		no	no	no		no	yes	yes	yes	yes	yes	no	no	no	yes		-	-		10.23	-	-		-	BAP1 (3 tissues); GLYCTK (2 tissues); GNL3 (2 tissues); ITIH4 (5 tissues); ITIH4-AS1 (1 tissue); NISCH (3 tissues); NT5DC2 (1 tissue); SMIM4 (1 tissue); STAB1 (6 tissues); TLR9 (3 tissues); TMEM110 (1 tissue); TNNC1 (1 tissue)
		3-52412461-C-T	rs71297396	3	52412461	intron_variant	DNAH1	no	no		no	no	no		no	no	no	yes	no	no	no	no	no	yes		YY1	-		0.058	-	-		-	BAP1 (1 tissue); GLYCTK (1 tissue); GNL3 (2 tissues); ITIH4 (4 tissues); ITIH4-AS1 (1 tissue); NISCH (3 tissues); NT5DC2 (1 tissue); SMIM4 (1 tissue); STAB1 (8 tissues); TLR9 (3 tissues); TNNC1 (3 tissues)
		3-52413670-C-T	rs13089892	3	52413670	intron_variant	DNAH1	no	no		no	no	no		yes	yes	yes	no	no	no	no	no	no	yes		CTCFL, CTCF, Rad21	-		3.379	-	-		-	BAP1 (1 tissue); GLYCTK (1 tissue); GNL3 (2 tissues); ITIH4 (3 tissues); ITIH4-AS1 (1 tissue); NISCH (3 tissues); NT5DC2 (1 tissue); RP5-966M1.7 (1 tissue); SMIM4 (1 tissue); STAB1 (7 tissues); TLR9 (3 tissues); TNNC1 (3 tissues)
		3-52414273-G-A	rs13091360	3	52414273	intron_variant	DNAH1	no	no		no	no	no		yes	no	yes	no	no	no	no	no	no	yes		GR, SMC3, T3R, TR4	-		0.006	-	-		-	BAP1 (1 tissue); GLYCTK (1 tissue); GNL3 (2 tissues); ITIH4 (4 tissues); ITIH4-AS1 (1 tissue); NISCH (3 tissues); NT5DC2 (1 tissue); SMIM4 (1 tissue); STAB1 (8 tissues); TLR9 (3 tissues); TNNC1 (3 tissues)
		3-52419291-C-G	rs34827613	3	52419291	intron_variant	DNAH1	no	yes (2)		no	no	no		yes	no	no	yes	no	yes	no	no	yes	no		HEY1, Nanog, SMC3, Sin3Ak-20, TCF12	CTCF (Caco-2, HCT-116), POLR2A, ELF1, TCF12, YY1, ZBTB33, RAD21, RXRA, JUND, SP4, TEAD4, CBX3, MAX, RCOR1, MAZ, SIN3A, SMC3, ZNF143, MYC, TCF7L2 (HCT-116), ZNF263		4.575	-	-		-	BAP1 (1 tissue); GLYCTK (1 tissue); GNL3 (2 tissues); ITIH4 (4 tissues); ITIH4-AS1 (1 tissue); NISCH (3 tissues); NT5DC2 (1 tissue); SMIM4 (1 tissue); STAB1 (8 tissues); TLR9 (3 tissues); TNNC1 (3 tissues)
		3-52426884-C-T	rs419050	3	52426884	synonymous_variant	DNAH1	no	no		no	no	no		no	no	no	no	no	no	no	no	no	no		ERalpha-a, FXR, GCNF	-		1.051	-	-		-	BAP1 (2 tissues); GLYCTK (1 tissue); GNL3 (2 tissues); ITIH4 (4 tissues); ITIH4-AS1 (1 tissue); NISCH (4 tissues); NT5DC2 (1 tissue); SMIM4 (1 tissue); STAB1 (7 tissues); TLR9 (3 tissues); TNNC1 (3 tissues)
		3-52429665-C-T	rs419752	3	52429665	missense_variant	DNAH1	no	yes (1)		no	no	no		no	no	no	no	yes	no	no	no	no	no		NF-E2, TEF-1, Zbtb12	-		25.2	0.998	possibly_damaging(0.656)		-	BAP1 (2 tissues); GLYCTK (1 tissue); GNL3 (2 tissues); ITIH4 (4 tissues); ITIH4-AS1 (1 tissue); NISCH (4 tissues); NT5DC2 (1 tissue); SMIM4 (1 tissue); STAB1 (7 tissues); TLR9 (3 tissues); TNNC1 (3 tissues)
		3-52432033-C-T	rs123603	3	52432033	downstream_gene_variant; intron_variant	BAP1; DNAH1	no	no		no	no	no		no	no	no	no	no	no	no	no	no	no		-	-		1.095	-	-		-	BAP1 (2 tissues); GLYCTK (1 tissue); GNL3 (2 tissues); ITIH4 (5 tissues); ITIH4-AS1 (1 tissue); NISCH (3 tissues); NT5DC2 (1 tissue); SMIM4 (1 tissue); STAB1 (6 tissues); TLR9 (3 tissues); TNNC1 (2 tissues)
		3-52435860-G-A	rs123598	3	52435860	3_prime_UTR_variant; downstream_gene_variant	BAP1; DNAH1	no	no		no	no	no		no	no	no	yes	no	no	no	no	no	yes		-	FOXA1		2.743	-	-		-	BAP1 (2 tissues); GLYCTK (1 tissue); GNL3 (2 tissues); ITIH4 (3 tissues); ITIH4-AS1 (1 tissue); NISCH (4 tissues); NT5DC2 (1 tissue); RP5-966M1.7 (1 tissue); SMIM4 (1 tissue); STAB1 (7 tissues); TLR9 (3 tissues); TNNC1 (3 tissues)
		3-52441606-A-T	rs419604	3	52441606	intron_variant; upstream_gene_variant	BAP1; PHF7	yes (3)	no		no	no	no		yes	yes	no	yes	yes	yes	no	no	yes	yes		-	-		6.158	-	-		-	BAP1 (2 tissues); GLYCTK (1 tissue); GNL3 (2 tissues); ITIH4 (3 tissues); ITIH4-AS1 (1 tissue); NISCH (4 tissues); NT5DC2 (1 tissue); RP5-966M1.7 (1 tissue); SMIM4 (1 tissue); STAB1 (7 tissues); TLR9 (3 tissues); TNNC1 (3 tissues)
		3-52443280-A-G	rs409803	3	52443280	intron_variant; upstream_gene_variant	BAP1; PHF7	yes (4)	yes (24)		yes (1)	no	no		yes	yes	yes	yes	yes	yes	yes	yes	yes	yes		FAC1, Foxj2	-		10.55	-	-		-	BAP1 (2 tissues); DNAH1 (1 tissue); GLYCTK (1 tissue); GNL3 (2 tissues); ITIH4 (7 tissues); ITIH4-AS1 (1 tissue); MUSTN1 (1 tissue); NISCH (3 tissues); NT5DC2 (1 tissue); RP5-966M1.7 (1 tissue); SMIM4 (1 tissue); STAB1 (7 tissues); TLR9 (4 tissues); TMEM110 (1 tissue); TNNC1 (2 tissues)
		3-52448913-A-G	rs2109557	3	52448913	intron_variant; upstream_gene_variant	PHF7; BAP1	no	no		no	no	no		no	no	no	no	no	no	no	no	no	no		BDP1, Maf, Spz1, p300	-		2.784	-	-		-	BAP1 (1 tissue); GLYCTK (1 tissue); GNL3 (2 tissues); ITIH4 (3 tissues); ITIH4-AS1 (1 tissue); NISCH (4 tissues); NT5DC2 (1 tissue); SMIM4 (1 tissue); STAB1 (7 tissues); TLR9 (3 tissues); TNNC1 (2 tissues)
		3-52449047-T-C	rs2878549	3	52449047	intron_variant; upstream_gene_variant	PHF7; BAP1	no	no		no	no	no		no	no	no	no	no	no	no	no	no	no		Foxa, Maf	-		1.151	-	-		-	BAP1 (1 tissue); GLYCTK (1 tissue); GNL3 (2 tissues); ITIH4 (3 tissues); ITIH4-AS1 (1 tissue); NISCH (4 tissues); NT5DC2 (1 tissue); SMIM4 (1 tissue); STAB1 (7 tissues); TLR9 (3 tissues); TNNC1 (2 tissues)
		3-52453893-C-T	rs498778	3	52453893	synonymous_variant	PHF7	no	no		no	no	no		no	no	no	no	no	no	no	no	yes	yes		Myc	EGR1		10.44	-	-		-	BAP1 (2 tissues); GLYCTK (1 tissue); GNL3 (2 tissues); ITIH4 (3 tissues); ITIH4-AS1 (1 tissue); NISCH (4 tissues); NT5DC2 (1 tissue); RP5-966M1.7 (1 tissue); SMIM4 (1 tissue); STAB1 (7 tissues); TLR9 (3 tissues); TNNC1 (3 tissues)
		3-52459175-C-T	rs575476	3	52459175	downstream_gene_variant	PHF7	no	no		no	no	no		no	no	no	no	no	no	no	no	no	no		Foxd1, Foxj1, Foxp1, Nkx2	SP1		6.884	-	-		-	BAP1 (2 tissues); GLYCTK (1 tissue); GNL3 (2 tissues); ITIH4 (3 tissues); ITIH4-AS1 (1 tissue); NISCH (4 tissues); NT5DC2 (1 tissue); RP5-966M1.7 (1 tissue); SMIM4 (1 tissue); STAB1 (7 tissues); TLR9 (3 tissues); TNNC1 (3 tissues)
		3-52459843-T-C	rs6795333	3	52459843	downstream_gene_variant	PHF7	no	no		no	no	no		no	no	no	no	no	no	no	no	no	no		Crx, GZF1, Pitx2	-		2.924	-	-		-	BAP1 (2 tissues); GLYCTK (1 tissue); GNL3 (2 tissues); ITIH4 (3 tissues); ITIH4-AS1 (1 tissue); NISCH (4 tissues); NT5DC2 (1 tissue); RP5-966M1.7 (1 tissue); SMIM4 (1 tissue); STAB1 (7 tissues); TLR9 (3 tissues); TNNC1 (3 tissues)
		3-52459881-C-T	rs11130303	3	52459881	downstream_gene_variant	PHF7	no	no		no	no	no		no	no	no	no	no	no	no	no	no	no		Mef2, SIX5	-		0.908	-	-		-	BAP1 (2 tissues); GLYCTK (1 tissue); GNL3 (2 tissues); ITIH4 (3 tissues); ITIH4-AS1 (1 tissue); NISCH (4 tissues); NT5DC2 (1 tissue); RP5-966M1.7 (1 tissue); SMIM4 (1 tissue); STAB1 (7 tissues); TLR9 (3 tissues); TNNC1 (3 tissues)
		3-52468940-T-C	rs613519	3	52468940	3_prime_UTR_variant	SEMA3G	no	no		no	no	no		no	no	yes	no	yes	yes	yes	no	yes	yes		BDP1, LF-A1, Pax-4, Pax-5	-		2.72	-	-		-	BAP1 (1 tissue); DNAH1 (1 tissue); GLYCTK (1 tissue); GNL3 (2 tissues); ITIH4 (7 tissues); ITIH4-AS1 (1 tissue); MUSTN1 (1 tissue); NISCH (3 tissues); NT5DC2 (1 tissue); RP5-966M1.7 (1 tissue); SMIM4 (1 tissue); STAB1 (7 tissues); TLR9 (4 tissues); TMEM110 (1 tissue); TNNC1 (2 tissues)
		3-52478802-T-C	rs113966471	3	52478802	intron_variant	SEMA3G	no	yes (4)		yes (2)	no	no		yes	yes	yes	yes	yes	yes	yes	yes	yes	yes		Egr-1, Mtf1, Zbtb3	CTCF, POLR2A (HCT-116), NR2C2		0.732	-	-		-	-
		3-52480446-T-C	rs676034	3	52480446	downstream_gene_variant; upstream_gene_variant	TNNC1; SEMA3G	no	yes (2)		no	no	no		no	yes	no	yes	no	no	no	no	yes	yes		AP-1, BCL, ERalpha-a, Esr2, Mrg1::Hoxa9, Mrg, Tgif1	-		3.652	-	-		-	BAP1 (2 tissues); GLYCTK (1 tissue); GNL3 (2 tissues); ITIH4 (3 tissues); ITIH4-AS1 (1 tissue); NISCH (4 tissues); NT5DC2 (1 tissue); RP5-966M1.7 (1 tissue); SMIM4 (1 tissue); STAB1 (7 tissues); TLR9 (3 tissues); TNNC1 (3 tissues)
		3-52487100-A-C	rs3755810	3	52487100	intron_variant; upstream_gene_variant	TNNC1; NISCH	no	yes (15)		no	no	no		yes	no	yes	yes	yes	yes	no	no	yes	no		CACD, Irf, Klf4, MAZR, MZF1::1-4, Pax-4, SP1, STAT, Smad4, TATA, UF1H3BETA	-		9.321	-	-		-	BAP1 (2 tissues); GLYCTK (1 tissue); GNL3 (2 tissues); ITIH4 (3 tissues); ITIH4-AS1 (1 tissue); NISCH (4 tissues); NT5DC2 (1 tissue); RP5-966M1.7 (1 tissue); SMIM4 (1 tissue); STAB1 (7 tissues); TLR9 (3 tissues); TNNC1 (3 tissues)
		3-52488202-C-T	rs1035002	3	52488202	upstream_gene_variant; upstream_gene_variant	NISCH; TNNC1	yes (1)	yes (23)		yes (1)	no	no		yes	yes	yes	yes	yes	yes	no	no	yes	yes		HIF1, HNF4, RXRA	POLR2A, TEAD4, CEBPD, MAZ		5.561	-	-		-	BAP1 (2 tissues); GLYCTK (2 tissues); GNL3 (2 tissues); ITIH4 (3 tissues); ITIH4-AS1 (1 tissue); NISCH (4 tissues); NT5DC2 (1 tissue); RP5-966M1.7 (1 tissue); SMIM4 (1 tissue); STAB1 (8 tissues); TLR9 (3 tissues); TNNC1 (3 tissues)
		3-52489074-A-G	rs2215466	3	52489074	upstream_gene_variant; upstream_gene_variant	NISCH; TNNC1	yes (4)	yes (29)		yes (3)	no	no		yes	yes	yes	yes	yes	yes	yes	yes	yes	yes		Duxl, Egr-1, Pbx-1	POLR2A (HCT-116), NFIC, PML, MAX, E2F1		4.16	-	-		-	BAP1 (2 tissues); GLYCTK (1 tissue); GNL3 (2 tissues); ITIH4 (3 tissues); ITIH4-AS1 (1 tissue); NISCH (4 tissues); NT5DC2 (1 tissue); SMIM4 (1 tissue); STAB1 (9 tissues); TLR9 (3 tissues); TNNC1 (3 tissues)
		3-52492085-G-A	rs4687614	3	52492085	intron_variant; upstream_gene_variant	NISCH; TNNC1	no	no		no	no	no		yes	yes	no	no	no	yes	no	no	no	yes		Dbx2, Hoxa9, Hoxb7, Isl2, Pdx1, Pou1f1, Pou2f2, Pou3f2, Pou3f4, Pou4f3	-		0.727	-	-		-	BAP1 (1 tissue); GLYCTK (1 tissue); GNL3 (2 tissues); ITIH4 (3 tissues); ITIH4-AS1 (1 tissue); NISCH (3 tissues); NT5DC2 (1 tissue); RP5-966M1.7 (1 tissue); SMIM4 (1 tissue); STAB1 (10 tissues); TLR9 (3 tissues); TNNC1 (3 tissues)
		3-52492475-A-G	rs9850471	3	52492475	intron_variant; upstream_gene_variant	NISCH; TNNC1	no	no		no	no	no		yes	yes	no	no	no	yes	no	no	no	yes		Foxp1, Hand1, Smad3, Sox	-		11.47	-	-		-	BAP1 (1 tissue); GLYCTK (1 tissue); GNL3 (2 tissues); ITIH4 (3 tissues); ITIH4-AS1 (1 tissue); NISCH (4 tissues); NT5DC2 (1 tissue); SMIM4 (1 tissue); STAB1 (10 tissues); TLR9 (3 tissues); TNNC1 (2 tissues)
		3-52493275-A-G	rs9855470	3	52493275	intron_variant	NISCH	no	no		no	no	no		no	yes	no	no	no	yes	no	no	no	yes		ATF3, E2F, GR, THAP1, YY1	-		0.56	-	-		-	BAP1 (1 tissue); GLYCTK (1 tissue); GNL3 (2 tissues); ITIH4 (3 tissues); ITIH4-AS1 (1 tissue); NISCH (4 tissues); NT5DC2 (1 tissue); SMIM4 (1 tissue); STAB1 (10 tissues); TLR9 (3 tissues); TNNC1 (2 tissues)
		3-52494141-A-G	rs13074649	3	52494141	intron_variant	NISCH	no	no		no	no	no		no	yes	no	no	no	no	no	no	no	no		Hdx	-		2.17	-	-		-	BAP1 (1 tissue); GLYCTK (1 tissue); GNL3 (2 tissues); ITIH4 (3 tissues); ITIH4-AS1 (1 tissue); NISCH (4 tissues); NT5DC2 (1 tissue); SMIM4 (1 tissue); STAB1 (10 tissues); TLR9 (3 tissues); TNNC1 (2 tissues)
		3-52495365-G-T	rs4687541	3	52495365	intron_variant	NISCH	no	no		no	no	no		yes	yes	no	yes	no	yes	no	no	no	yes		LRH1, SF1	-		2.035	-	-		-	BAP1 (1 tissue); GLYCTK (1 tissue); GNL3 (2 tissues); ITIH4 (3 tissues); ITIH4-AS1 (1 tissue); NISCH (4 tissues); NT5DC2 (1 tissue); SMIM4 (1 tissue); STAB1 (10 tissues); TLR9 (3 tissues); TNNC1 (2 tissues)
		3-52496229-C-T	rs3774409	3	52496229	intron_variant	NISCH	no	no		no	no	no		yes	yes	no	yes	no	yes	no	no	yes	yes		HNF4	-		5.742	-	-		-	BAP1 (1 tissue); GLYCTK (1 tissue); GNL3 (2 tissues); ITIH4 (3 tissues); ITIH4-AS1 (1 tissue); NISCH (3 tissues); NT5DC2 (1 tissue); SMIM4 (1 tissue); STAB1 (9 tissues); TLR9 (3 tissues); TNNC1 (2 tissues)
		3-52497254-C-G	rs6771558	3	52497254	intron_variant	NISCH	no	no		no	no	no		yes	yes	no	no	no	yes	no	no	no	no		Evi-1, GATA, Gfi1, Gfi1b, Hdx, Pou2f2, Sox, TCF4	-		7.188	-	-		-	BAP1 (1 tissue); GLYCTK (1 tissue); GNL3 (2 tissues); ITIH4 (3 tissues); ITIH4-AS1 (1 tissue); NISCH (4 tissues); NT5DC2 (1 tissue); SMIM4 (1 tissue); STAB1 (10 tissues); TLR9 (3 tissues); TNNC1 (2 tissues)
		3-52497849-C-T	rs6772191	3	52497849	intron_variant	NISCH	no	no		no	no	no		yes	no	no	no	no	yes	no	no	no	no		-	-		0.376	-	-		-	BAP1 (1 tissue); GLYCTK (1 tissue); GNL3 (2 tissues); ITIH4 (3 tissues); ITIH4-AS1 (1 tissue); NISCH (4 tissues); NT5DC2 (1 tissue); SMIM4 (1 tissue); STAB1 (10 tissues); TLR9 (3 tissues); TNNC1 (2 tissues)
		3-52498782-A-C	rs2335928	3	52498782	intron_variant	NISCH	no	no		no	no	no		yes	yes	no	no	no	yes	no	no	no	no		E2A, FXR, LXR, Mxi1, Myf, TAL1, ZEB1	-		1.957	-	-		-	BAP1 (1 tissue); GLYCTK (1 tissue); GNL3 (2 tissues); ITIH4 (3 tissues); ITIH4-AS1 (1 tissue); NISCH (4 tissues); NT5DC2 (1 tissue); SMIM4 (1 tissue); STAB1 (10 tissues); TLR9 (3 tissues); TNNC1 (2 tissues)
		3-52498966-A-G	rs2335929	3	52498966	intron_variant	NISCH	no	no		no	no	no		yes	yes	no	yes	no	no	no	no	no	no		ATF3, SETDB1	-		4.499	-	-		-	BAP1 (1 tissue); GLYCTK (1 tissue); GNL3 (2 tissues); ITIH4 (3 tissues); ITIH4-AS1 (1 tissue); NISCH (4 tissues); NT5DC2 (1 tissue); SMIM4 (1 tissue); STAB1 (10 tissues); TLR9 (3 tissues); TNNC1 (2 tissues)
		3-52500452-C-G	rs6782162	3	52500452	intron_variant	NISCH	no	yes (1)		no	no	no		yes	yes	yes	yes	no	no	no	no	no	yes		AhR::Arnt, Arnt, E2A, Hic1, Hmx, Pax-4, ZEB1	GATA1		0.253	-	-		-	BAP1 (1 tissue); GLYCTK (1 tissue); GNL3 (2 tissues); ITIH4 (3 tissues); ITIH4-AS1 (1 tissue); NISCH (4 tissues); NT5DC2 (1 tissue); SMIM4 (1 tissue); STAB1 (10 tissues); TLR9 (3 tissues); TNNC1 (2 tissues)
		3-52500521-T-C	rs9847332	3	52500521	intron_variant	NISCH	no	yes (1)		no	no	no		yes	yes	yes	yes	no	no	no	yes	no	yes		ERalpha-a, Ets	GATA1		1.297	-	-		-	BAP1 (1 tissue); GLYCTK (1 tissue); GNL3 (2 tissues); ITIH4 (3 tissues); ITIH4-AS1 (1 tissue); NISCH (4 tissues); NT5DC2 (1 tissue); SMIM4 (1 tissue); STAB1 (10 tissues); TLR9 (3 tissues); TNNC1 (2 tissues)
		3-52501109-T-C	rs4687616	3	52501109	intron_variant	NISCH	yes (1)	yes (1)		no	no	no		yes	yes	no	no	no	no	no	no	no	yes		CTCF, Ets, HNF4, Irf, Myf, NRSF, RXRA, Rad21, SMC3, SP1, Znf143	FOXA1, FOXA2		0.136	-	-		-	BAP1 (1 tissue); GLYCTK (1 tissue); GNL3 (2 tissues); ITIH4 (3 tissues); ITIH4-AS1 (1 tissue); NISCH (4 tissues); NT5DC2 (1 tissue); SMIM4 (1 tissue); STAB1 (10 tissues); TLR9 (3 tissues); TNNC1 (2 tissues)
		3-52501292-T-C	rs6414568	3	52501292	intron_variant	NISCH	yes (1)	yes (1)		no	no	no		yes	yes	no	no	no	no	no	yes	no	yes		Pax-4	-		3.534	-	-		-	BAP1 (1 tissue); GLYCTK (1 tissue); GNL3 (2 tissues); ITIH4 (3 tissues); ITIH4-AS1 (1 tissue); NISCH (4 tissues); NT5DC2 (1 tissue); SMIM4 (1 tissue); STAB1 (10 tissues); TLR9 (3 tissues); TNNC1 (2 tissues)
		3-52503701-A-G	rs6445483	3	52503701	intron_variant	NISCH	no	no		no	no	no		yes	yes	no	yes	yes	no	no	no	no	yes		CAC-binding-protein, FXR, Maf, Pax-4, SP1, STAT	-		1.176	-	-		-	BAP1 (1 tissue); GLYCTK (1 tissue); GNL3 (2 tissues); ITIH4 (3 tissues); ITIH4-AS1 (1 tissue); NISCH (4 tissues); NT5DC2 (1 tissue); SMIM4 (1 tissue); STAB1 (10 tissues); TLR9 (3 tissues); TNNC1 (2 tissues)
		3-52503800-A-G	rs6445484	3	52503800	intron_variant	NISCH	no	no		no	no	no		yes	yes	no	yes	yes	no	no	no	no	yes		E2F, Myc, SIRT6, p53	-		0.049	-	-		-	BAP1 (1 tissue); GLYCTK (1 tissue); GNL3 (2 tissues); ITIH4 (3 tissues); ITIH4-AS1 (1 tissue); NISCH (4 tissues); NT5DC2 (1 tissue); SMIM4 (1 tissue); STAB1 (10 tissues); TLR9 (3 tissues); TNNC1 (2 tissues)
		3-52503823-T-C	rs6445485	3	52503823	intron_variant	NISCH	no	no		no	no	no		yes	yes	no	yes	yes	no	no	no	no	yes		BDP1	-		0.615	-	-		-	BAP1 (1 tissue); GLYCTK (1 tissue); GNL3 (2 tissues); ITIH4 (3 tissues); ITIH4-AS1 (1 tissue); NISCH (4 tissues); NT5DC2 (1 tissue); SMIM4 (1 tissue); STAB1 (10 tissues); TLR9 (3 tissues); TNNC1 (2 tissues)
		3-52504133-G-T	rs1035003	3	52504133	intron_variant	NISCH	no	no		no	no	no		yes	yes	no	no	no	no	no	yes	no	no		BCL, GATA, HDAC2, Irf, Pax-4, p300	-		0.497	-	-		-	BAP1 (1 tissue); GLYCTK (1 tissue); GNL3 (2 tissues); ITIH4 (3 tissues); ITIH4-AS1 (1 tissue); NISCH (4 tissues); NT5DC2 (1 tissue); SMIM4 (1 tissue); STAB1 (10 tissues); TLR9 (3 tissues); TNNC1 (2 tissues)
		3-52504503-C-T	rs1011064	3	52504503	intron_variant	NISCH	no	no		no	no	no		yes	yes	no	yes	no	no	no	yes	yes	yes		BDP1, GR, STAT	-		0.478	-	-		-	BAP1 (1 tissue); GLYCTK (1 tissue); GNL3 (2 tissues); ITIH4 (3 tissues); ITIH4-AS1 (1 tissue); NISCH (4 tissues); NT5DC2 (1 tissue); SMIM4 (1 tissue); STAB1 (10 tissues); TLR9 (3 tissues); TNNC1 (2 tissues)
		3-52505445-C-T	rs929528	3	52505445	intron_variant	NISCH	no	no		no	yes (2)	no		yes	yes	yes	yes	yes	no	no	yes	yes	yes		YY1	-		0.73	-	-		-	BAP1 (1 tissue); GLYCTK (1 tissue); GNL3 (2 tissues); ITIH4 (3 tissues); ITIH4-AS1 (1 tissue); NISCH (4 tissues); NT5DC2 (1 tissue); SMIM4 (1 tissue); STAB1 (10 tissues); TLR9 (3 tissues); TNNC1 (2 tissues)
		3-52505525-T-C	rs929529	3	52505525	intron_variant	NISCH	no	no		no	yes (2)	no		yes	yes	yes	yes	yes	no	no	yes	yes	yes		Pax-5, Pbx3, Znf143, p300	MYC		5.881	-	-		-	BAP1 (1 tissue); GLYCTK (1 tissue); GNL3 (2 tissues); ITIH4 (3 tissues); ITIH4-AS1 (1 tissue); NISCH (4 tissues); NT5DC2 (1 tissue); SMIM4 (1 tissue); STAB1 (10 tissues); TLR9 (3 tissues); TNNC1 (2 tissues)
		3-52506282-A-G	rs4312651	3	52506282	intron_variant	NISCH	no	no		yes (2)	yes (1)	no		yes	yes	yes	yes	yes	yes	no	yes	yes	yes		RXRA	CTCF (Caco-2, HCT-116), POLR2A, RAD21, MAX, MXI1, SMC3, ZNF143, MYC		3.101	-	-		-	BAP1 (1 tissue); GLYCTK (1 tissue); GNL3 (2 tissues); ITIH4 (3 tissues); ITIH4-AS1 (1 tissue); NISCH (4 tissues); NT5DC2 (1 tissue); SMIM4 (1 tissue); STAB1 (10 tissues); TLR9 (3 tissues); TNNC1 (2 tissues)
		3-52506491-A-G	rs6445486	3	52506491	intron_variant	NISCH	no	no		yes (2)	no	no		yes	yes	yes	yes	yes	yes	no	yes	yes	yes		Cphx, Gfi1b, Pou3f2, RORalpha1	-		2.558	-	-		-	BAP1 (1 tissue); GLYCTK (1 tissue); GNL3 (2 tissues); ITIH4 (3 tissues); ITIH4-AS1 (1 tissue); NISCH (4 tissues); NT5DC2 (1 tissue); SMIM4 (1 tissue); STAB1 (10 tissues); TLR9 (3 tissues); TNNC1 (2 tissues)
		3-52506903-A-G	rs1011062	3	52506903	intron_variant	NISCH	no	no		no	no	no		yes	yes	yes	no	yes	yes	no	no	no	yes		-	-		5.017	-	-		-	BAP1 (1 tissue); GLYCTK (1 tissue); GNL3 (2 tissues); ITIH4 (3 tissues); ITIH4-AS1 (1 tissue); NISCH (4 tissues); NT5DC2 (1 tissue); SMIM4 (1 tissue); STAB1 (10 tissues); TLR9 (3 tissues); TNNC1 (2 tissues)
		3-52513027-G-C	rs9867823	3	52513027	intron_variant	NISCH	no	no		no	no	no		yes	yes	no	no	no	yes	no	no	no	yes		Gfi1, SP1, Znf143	-		2.59	-	-		-	BAP1 (1 tissue); GLYCTK (1 tissue); GNL3 (2 tissues); ITIH4 (3 tissues); ITIH4-AS1 (1 tissue); NISCH (4 tissues); NT5DC2 (1 tissue); SMIM4 (1 tissue); STAB1 (10 tissues); TLR9 (3 tissues); TNNC1 (2 tissues)
		3-52513940-T-C	rs4687618	3	52513940	intron_variant	NISCH	no	no		no	no	no		yes	yes	no	yes	yes	yes	no	no	yes	yes		Ik-1, Spz1, TATA, ZBTB7A, Zfp740	-		1.06	-	-		-	GLYCTK (1 tissue); GNL3 (2 tissues); ITIH4 (3 tissues); ITIH4-AS1 (1 tissue); NISCH (3 tissues); NT5DC2 (1 tissue); SMIM4 (1 tissue); STAB1 (10 tissues); TLR9 (2 tissues); TNNC1 (2 tissues)
		3-52515533-T-C	rs758803	3	52515533	3_prime_UTR_variant; intron_variant	NISCH; NISCH	no	no		no	no	no		yes	yes	no	yes	no	no	no	yes	no	yes		ATF3, ATF4, CTCF, Ets, Rad21, YY1	-		0.429	-	-		-	BAP1 (1 tissue); GLYCTK (1 tissue); GNL3 (2 tissues); ITIH4 (3 tissues); ITIH4-AS1 (1 tissue); NISCH (4 tissues); NT5DC2 (1 tissue); SMIM4 (1 tissue); STAB1 (10 tissues); TLR9 (3 tissues); TNNC1 (2 tissues)
		3-52518786-T-C	rs4687619	3	52518786	downstream_gene_variant; intron_variant	NISCH	no	no		no	no	no		yes	yes	yes	yes	yes	yes	no	no	yes	yes		-	-		5.602	-	-		-	BAP1 (1 tissue); GLYCTK (1 tissue); GNL3 (2 tissues); ITIH4 (3 tissues); ITIH4-AS1 (1 tissue); NISCH (4 tissues); NT5DC2 (1 tissue); SMIM4 (1 tissue); STAB1 (10 tissues); TLR9 (3 tissues); TNNC1 (2 tissues)
		3-52520502-C-A	rs4687544	3	52520502	downstream_gene_variant; intron_variant	NISCH	no	no		no	no	no		no	yes	no	no	no	no	no	no	no	yes		Zbtb3	-		0.054	-	-		-	BAP1 (1 tissue); GLYCTK (1 tissue); GNL3 (2 tissues); ITIH4 (3 tissues); ITIH4-AS1 (1 tissue); NISCH (4 tissues); NT5DC2 (1 tissue); SMIM4 (1 tissue); STAB1 (10 tissues); TLR9 (3 tissues); TNNC1 (2 tissues)
		3-52524574-C-A	rs6810027	3	52524574	intron_variant; upstream_gene_variant	NISCH; STAB1	no	no		no	no	no		yes	yes	yes	yes	yes	yes	yes	yes	yes	yes		BDP1, CTCF, HNF4, RXRA, Rad21	TBP		4.508	-	-		-	BAP1 (1 tissue); GLYCTK (1 tissue); GNL3 (2 tissues); ITIH4 (3 tissues); ITIH4-AS1 (1 tissue); NISCH (4 tissues); NT5DC2 (1 tissue); SMIM4 (1 tissue); STAB1 (10 tissues); TLR9 (3 tissues); TNNC1 (2 tissues)
		3-52524974-A-C	rs4687621	3	52524974	intron_variant; upstream_gene_variant	NISCH; STAB1	no	no		no	no	no		yes	yes	no	yes	yes	yes	no	no	yes	yes		TR4	POLR2A, GATA2		4.682	-	-		-	BAP1 (1 tissue); GLYCTK (1 tissue); GNL3 (2 tissues); ITIH4 (3 tissues); ITIH4-AS1 (1 tissue); NISCH (4 tissues); NT5DC2 (1 tissue); SMIM4 (1 tissue); STAB1 (10 tissues); TLR9 (3 tissues); TNNC1 (2 tissues)
		3-52529266-T-C	rs758800	3	52529266	downstream_gene_variant; upstream_gene_variant	NISCH; STAB1	no	yes (1)		no	no	no		yes	yes	yes	yes	yes	yes	no	no	yes	yes		BDP1, CCNT2, GATA, TAL1	POLR2A, GATA2, FOS		12.27	-	-		-	BAP1 (2 tissues); GLYCTK (1 tissue); GNL3 (2 tissues); ITIH4 (3 tissues); ITIH4-AS1 (1 tissue); NISCH (3 tissues); NT5DC2 (1 tissue); SMIM4 (1 tissue); STAB1 (10 tissues); TLR9 (3 tissues); TNNC1 (1 tissue)
		3-52529773-T-G	rs9846089	3	52529773	downstream_gene_variant; intron_variant	NISCH; STAB1	no	yes (2)		no	yes (2)	no		yes	yes	yes	yes	yes	yes	yes	yes	yes	yes		-	MAX, MXI1, STAT3, MYC		8.404	-	-		-	BAP1 (1 tissue); GLYCTK (1 tissue); GNL3 (2 tissues); ITIH4 (3 tissues); ITIH4-AS1 (1 tissue); NISCH (4 tissues); NT5DC2 (1 tissue); SMIM4 (1 tissue); STAB1 (10 tissues); TLR9 (3 tissues); TNNC1 (2 tissues)
5q32	rs2302274	5-149543790-C-A	rs10875555	5	149543790	upstream_gene_variant	CDX1	yes (4)	yes (23)		no	no	no		no	no	yes	yes	yes	no	no	no	yes	yes		Cdx, Dbx1, Fox, Foxa, Foxd3, Foxf1, Foxi1, Foxj1, Foxj2, Foxl1, Foxo, Foxp1, HDAC2, Hlx1, Pou2f2, Pou3f2, Pou3f3, TATA, TEF, Zfp187	-		1.16	-	-		-	CDX1 (1 tissue)
		5-149543812-T-C	rs6887526	5	149543812	upstream_gene_variant	CDX1	yes (4)	yes (23)		no	no	no		no	no	yes	yes	yes	no	no	no	yes	yes		Nanog, Nrf-2, Pou2f2, Pou5f1, Sox	-		9.531	-	-		-	CDX1 (1 tissue)
		5-149544045-G-A	rs3776082	5	149544045	upstream_gene_variant	CDX1	yes (4)	yes (23)		no	no	no		yes	yes	yes	yes	yes	yes	no	no	yes	yes		E4BP4	-		0.139	-	-		-	CDX1 (1 tissue); PDE6A (1 tissue)
		5-149545043-C-G	rs6872271	5	149545043	upstream_gene_variant	CDX1	yes (4)	yes (17)		no	no	no		yes	no	yes	yes	yes	no	no	no	yes	yes		-	-		4.104	-	-		-	CDX1 (1 tissue); PDE6A (1 tissue)
		5-149546426-A-G	rs2302274	5	149546426	5_prime_UTR_variant	CDX1	yes (4)	yes (24)		yes (1)	yes (1)	no		no	no	no	no	yes	yes	no	no	no	no		AP-2, BHLHE40, ELF1, HEY1, NF-kappaB, NRSF, Nrf1, SRF, TATA, TR4, WT1, YY1, ZBTB33, ZBTB7A, p300	EZH2, CTBP2		14.06	-	-		-	CDX1 (1 tissue); PDE6A (1 tissue)
		5-149546828-C-G	rs2302275	5	149546828	missense_variant	CDX1	yes (4)	yes (24)		yes (1)	yes (1)	no		no	yes	yes	no	yes	yes	no	no	no	yes		-	EZH2		16.08	0.948	benign(0.003)		-	CDX1 (1 tissue); PDE6A (1 tissue)
		5-149549022-C-T	rs887344	5	149549022	intron_variant	CDX1	yes (4)	yes (13)		no	no	no		no	yes	yes	yes	yes	no	no	no	yes	yes		Egr-1, Rad21	-		2.203	-	-		-	CDX1 (1 tissue); PDE6A (1 tissue)
		5-149549797-A-G	rs2237091	5	149549797	intron_variant	CDX1	yes (2)	yes (8)		no	no	no		no	yes	no	no	yes	no	no	no	no	no		Myc, p300	-		1.409	-	-		-	CDX1 (1 tissue); PDE6A (1 tissue)
		5-149551052-T-C	rs2282807	5	149551052	intron_variant	CDX1	yes (1)	yes (2)		no	no	no		no	yes	no	no	yes	yes	no	no	no	no		ERalpha-a, Esr2, Pax-5, STAT	-		2.865	-	-		-	CDX1 (1 tissue); PDE6A (1 tissue)
		5-149556558-T-G	rs717746	5	149556558	intron_variant	CDX1	yes (3)	yes (6)		no	no	no		no	yes	yes	yes	yes	no	no	no	yes	yes		AP-1, AP-2, Glis2, MAZR, Rad21, SMC3, Zfx	-		3.585	-	-		-	CDX1 (1 tissue); PDE6A (1 tissue); SLC6A7 (1 tissue)
7q32.3	rs73161913	7-130600748-A-G	rs17686932	7	130600748	-	-	yes (4)	yes (26)		no	yes (1)	no		yes	yes	yes	yes	yes	yes	yes	yes	yes	yes		CHX10, Maf, Pax7, Pou2f2, Pou3f2	POLR2A (HCT-116), HDAC2, EP300, ATF3, ELF1, FOSL2, NFIC, POU2F2, RXRA, SP1, JUND, TEAD4, HNF4A, HNF4G, MBD4, MYBL2, TBP, MYC, TCF7L2 (HCT-116), ARID3A		2.883	-	-		-	LINC-PINT (1 tissue); LINC00513 (2 tissues); RP11-138A9.2 (1 tissue)
		7-130602519-C-A	rs56409029	7	130602519	-	-	yes (4)	yes (25)		yes (1)	no	no		yes	yes	yes	yes	yes	yes	no	yes	yes	yes		Cphx, Foxo, Hoxa9, Myf, Sox, Zfp105	POLR2A (HCT-116), EP300, JUND, GATA2, STAT3, JUN		14.12	-	-		LINC00513; RP11-138A9.1	AC058791.1 (1 tissue); LINC-PINT (1 tissue); LINC00513 (3 tissues); RP11-138A9.1 (1 tissue); RP11-138A9.2 (1 tissue)
		7-130607779-G-A	rs73161913	7	130607779	-	-	yes (4)	yes (24)		yes (1)	yes (2)	no		no	yes	yes	yes	yes	yes	yes	yes	yes	yes		GATA, HNF4	POLR2A (HCT-116), EP300, NR3C1, NFIC, SP1, TEAD4, HNF4A		14.58	-	-		-	LINC-PINT (1 tissue); LINC00513 (2 tissues); RP11-138A9.2 (1 tissue)
10q23.31	rs7071258	10-91390555-G-A	rs72818732	10	91390555	intron_variant	PANK1	no	no		no	no	no		no	no	no	no	yes	no	yes	yes	no	no		-	-		1.105	-	-		KIF20B; PANK1; RP11-80H5.9	KIF20B (7 tissues); LINC00865 (4 tissues); PANK1 (3 tissues); RP11-80H5.6 (1 tissue); RP11-80H5.9 (16 tissues)
		10-91395731-C-G	rs11593819	10	91395731	intron_variant	PANK1	no	no		no	no	no		no	no	yes	yes	yes	no	no	yes	yes	no		HEN1, Myb, Myf, Zfx	-		0.394	-	-		KIF20B; PANK1; RP11-80H5.9	KIF20B (7 tissues); LINC00865 (4 tissues); PANK1 (3 tissues); RP11-80H5.6 (1 tissue); RP11-80H5.9 (16 tissues)
		10-91399564-G-T	rs72818736	10	91399564	intron_variant	PANK1	no	no		no	no	no		no	no	yes	no	yes	no	no	yes	yes	yes		AP-1, Nanog	GATA1		2.335	-	-		KIF20B; PANK1; RP11-80H5.9	KIF20B (6 tissues); LINC00865 (2 tissues); PANK1 (4 tissues); RP11-80H5.6 (1 tissue); RP11-80H5.9 (17 tissues)
		10-91403980-G-A	rs997456	10	91403980	intron_variant	PANK1	yes (4)	yes (29)		yes (3)	yes (3)	no		yes	yes	yes	yes	yes	yes	yes	yes	yes	yes		E2F, NRSF, p300	CHD1, POLR2A (HCT-116), EP300, PHF8, KDM5B, ELF1, REST, SIN3AK20, TAF1, TCF12, PML, POU2F2, TCF3, SP4, TAF7, CEBPD, MBD4, MAX, RELA, CHD2, RCOR1, E2F4, MAZ, MXI1, NFYA, NFYB, NRF1, SIN3A, TBP, MYC, GTF2F1, KAP1, ZNF263, SMARCB1, GATA1, GTF2B, IRF1, RDBP		8.779	-	-		KIF20B; PANK1; RP11-80H5.9	KIF20B (7 tissues); LINC00865 (3 tissues); PANK1 (4 tissues); RP11-80H5.6 (1 tissue); RP11-80H5.9 (17 tissues)
		10-91406233-G-C	rs12414849	10	91406233	upstream_gene_variant	PANK1	yes (3)	yes (18)		yes (1)	no	no		no	no	yes	yes	yes	yes	yes	yes	yes	yes		NRSF, Roaz, SP2	-		1.396	-	-		KIF20B; PANK1; RP11-80H5.9	KIF20B (7 tissues); LINC00865 (3 tissues); PANK1 (4 tissues); RP11-80H5.6 (1 tissue); RP11-80H5.9 (17 tissues)
		10-91410082-G-A	rs4426060	10	91410082	upstream_gene_variant	PANK1	no	no		no	no	no		no	no	no	no	no	no	no	no	no	no		CDP, Sox	-		0.122	-	-		KIF20B; PANK1; RP11-80H5.9	KIF20B (8 tissues); LINC00865 (4 tissues); PANK1 (4 tissues); RP11-80H5.6 (1 tissue); RP11-80H5.9 (19 tissues)
		10-91414004-A-G	rs72818740	10	91414004	-	-	no	yes (3)		no	no	no		no	no	no	no	no	yes	no	no	no	no		Nkx2, Nkx3	-		4.174	-	-		KIF20B; PANK1; RP11-80H5.9	KIF20B (6 tissues); LINC00865 (3 tissues); PANK1 (4 tissues); RP11-80H5.6 (1 tissue); RP11-80H5.9 (17 tissues)
		10-91428283-G-A	rs11595126	10	91428283	-	-	yes (4)	yes (18)		yes (3)	no	no		no	no	no	no	yes	no	no	no	no	yes		HDAC2, HNF4, LRH1	-		2.042	-	-		KIF20B; PANK1; RP11-80H5.9	KIF20B (7 tissues); LINC00865 (3 tissues); PANK1 (4 tissues); RP11-80H5.6 (1 tissue); RP11-80H5.9 (17 tissues)
		10-91429029-T-C	rs728852	10	91429029	-	-	yes (4)	yes (17)		yes (2)	no	no		no	no	no	no	yes	yes	no	no	yes	yes		-	-		9.538	-	-		KIF20B; PANK1; RP11-80H5.9	KIF20B (7 tissues); LINC00865 (3 tissues); PANK1 (4 tissues); RP11-80H5.6 (1 tissue); RP11-80H5.9 (17 tissues)
		10-91435916-A-G	rs72818744	10	91435916	-	-	no	no		no	no	no		no	no	no	no	no	no	no	no	no	no		Fox, HNF1	-		0.411	-	-		KIF20B; PANK1; RP11-80H5.9	KIF20B (7 tissues); LINC00865 (3 tissues); PANK1 (4 tissues); RP11-80H5.6 (1 tissue); RP11-80H5.9 (17 tissues)
		10-91440056-G-A	rs11599335	10	91440056	-	-	no	no		no	no	no		no	no	no	no	no	no	no	no	no	no		GATA, KAP1	BATF, EBF1, RUNX3, TBP		0.456	-	-		KIF20B; PANK1; RP11-80H5.9	KIF20B (8 tissues); LINC00865 (4 tissues); PANK1 (4 tissues); RP11-80H5.6 (1 tissue); RP11-80H5.9 (19 tissues)
		10-91443427-C-T	rs11597847	10	91443427	-	-	no	no		no	no	no		no	no	no	no	no	yes	no	no	no	no		Fox, Foxa, Foxd3, Foxf1, Foxi1, Foxj1, Foxj2, Foxk1, Foxl1, Foxp1, Mef2, TATA	-		0.023	-	-		KIF20B; PANK1; RP11-80H5.9	KIF20B (7 tissues); LINC00865 (3 tissues); PANK1 (4 tissues); RP11-80H5.6 (1 tissue); RP11-80H5.9 (17 tissues)
		10-91447997-G-A	rs72818750	10	91447997	-	-	no	no		no	no	no		no	no	no	no	no	no	no	no	no	no		Arid5a, Mef2, Pou1f1	-		0.995	-	-		KIF20B; PANK1; RP11-80H5.9	KIF20B (7 tissues); LINC00865 (3 tissues); PANK1 (4 tissues); RP11-80H5.6 (1 tissue); RP11-80H5.9 (17 tissues)
		10-91448256-G-C	rs72818751	10	91448256	-	-	no	no		no	no	no		no	no	no	no	no	no	no	no	no	no		Cdx, DMRT1, DMRT2, DMRT3, DMRT4, DMRT5, DMRT7, Hlx1, Hoxa5, Irf, STAT	-		2.25	-	-		KIF20B; PANK1; RP11-80H5.9	KIF20B (7 tissues); LINC00865 (3 tissues); PANK1 (4 tissues); RP11-80H5.6 (1 tissue); RP11-80H5.9 (17 tissues)
		10-91461120-A-T	rs11598257	10	91461120	upstream_gene_variant	KIF20B	yes (4)	yes (29)		yes (3)	yes (4)	no		yes	yes	yes	yes	yes	yes	yes	yes	yes	yes		Tgif1	CTCF (Caco-2), RBBP5, POLR2A (HCT-116), PHF8, KDM5B, CREB1, ELF1, GABPA, REST, SIN3AK20, TAF1, EGR1, NFIC, PAX5, PML, POU2F2, SP1, STAT5A, SP2, E2F6, MAX, FOXP2, RELA, BRCA1, FOS, CHD2, RCOR1, ELK1, MAZ, NFYA, NFYB, RFX5, TBP, MYC, GTF2F1, KAP1, E2F1, SMARCB1, IRF3, CCNT2, HMGN3, IRF1, SETDB1		8.254	-	-		KIF20B; PANK1; RP11-80H5.9	KIF20B (8 tissues); LINC00865 (4 tissues); PANK1 (4 tissues); RP11-80H5.6 (1 tissue); RP11-80H5.9 (19 tissues)
		10-91461153-C-A	rs11593892	10	91461153	upstream_gene_variant	KIF20B	yes (4)	yes (29)		yes (3)	yes (4)	no		yes	yes	yes	yes	yes	yes	yes	yes	yes	yes		AP-1	CTCF (Caco-2), RBBP5, POLR2A (HCT-116), PHF8, KDM5B, CREB1, ELF1, GABPA, REST, SIN3AK20, TAF1, ZBTB33 (HCT-116), EGR1, NFIC, PAX5, PML, POU2F2, SP1, SRF, STAT5A, SP2, E2F6, MAX, FOXP2, RELA, BRCA1, FOS, CHD2, RCOR1, ELK1, MAZ, NFYA, NFYB, RFX5, SIN3A, SMC3, TBP, GTF2F1, ELK4, KAP1, E2F1, SMARCB1, IRF3, CCNT2, HMGN3, IRF1, SETDB1		8.421	-	-		KIF20B; PANK1; RP11-80H5.9	KIF20B (8 tissues); LINC00865 (4 tissues); PANK1 (4 tissues); RP11-80H5.6 (1 tissue); RP11-80H5.9 (19 tissues)
		10-91463803-C-T	rs72818758	10	91463803	intron_variant	KIF20B	no	yes (1)		no	yes (1)	no		no	no	no	yes	no	yes	no	no	no	yes		Mtf1, SP1, SRF	-		5.629	-	-		KIF20B; PANK1; RP11-80H5.9	KIF20B (7 tissues); LINC00865 (3 tissues); PANK1 (4 tissues); RP11-80H5.6 (1 tissue); RP11-80H5.9 (17 tissues)
		10-91465266-G-A	rs72818759	10	91465266	intron_variant	KIF20B	no	yes (1)		no	no	no		no	no	no	yes	no	yes	no	no	no	yes		ERalpha-a, Foxa, HNF1, Nanog, RORalpha1	-		3.252	-	-		KIF20B; PANK1; RP11-80H5.9	KIF20B (8 tissues); LINC00865 (2 tissues); PANK1 (4 tissues); RP11-80H5.6 (1 tissue); RP11-80H5.9 (18 tissues)
		10-91474539-G-A	rs12414269	10	91474539	intron_variant	KIF20B	no	no		no	no	no		no	no	no	no	no	no	no	no	no	no		Arid3a, CEBPB, Crx, Dmbx1, FXR, Gsc, HNF1, Obox3, Obox6, Otx2, Pbx-1	-		3.153	-	-		KIF20B; PANK1; RP11-80H5.9	KIF20B (8 tissues); LINC00865 (4 tissues); PANK1 (4 tissues); RP11-80H5.6 (1 tissue); RP11-80H5.9 (19 tissues)
		10-91479211-G-T	rs17484219	10	91479211	missense_variant	KIF20B	no	no		no	no	no		no	no	no	no	no	no	no	no	no	no		EBF, Pou6f1, TATA	-		19.56	0.985	possibly_damaging(0.491)		KIF20B; PANK1; RP11-80H5.9	KIF20B (7 tissues); LINC00865 (3 tissues); PANK1 (4 tissues); RP11-80H5.6 (1 tissue); RP11-80H5.9 (17 tissues)
		10-91486813-C-G	rs75164520	10	91486813	intron_variant	KIF20B	no	no		no	no	no		no	no	no	no	no	no	no	no	no	no		Rad21, Smad3, TATA, Zfx	-		1.752	-	-		KIF20B; PANK1; RP11-80H5.9	KIF20B (7 tissues); LINC00865 (4 tissues); PANK1 (4 tissues); RP11-80H5.6 (1 tissue); RP11-80H5.9 (19 tissues)
		10-91490899-G-A	rs2026553	10	91490899	intron_variant	KIF20B	no	no		no	no	no		no	no	no	no	no	no	no	no	no	no		E2F, GR, Gfi1b	-		7.341	-	-		KIF20B; PANK1; RP11-80H5.9	KIF20B (8 tissues); LINC00865 (4 tissues); PANK1 (4 tissues); RP11-80H5.6 (1 tissue); RP11-80H5.9 (19 tissues)
		10-91498475-G-A	rs12413697	10	91498475	intron_variant	KIF20B	no	no		no	yes (1)	no		no	no	no	no	yes	yes	no	no	no	no		-	-		0.749	-	-		KIF20B; PANK1; RP11-80H5.9	KIF20B (7 tissues); LINC00865 (3 tissues); PANK1 (4 tissues); RP11-80H5.6 (1 tissue); RP11-80H5.9 (17 tissues)
		10-91498626-T-C	rs12415422	10	91498626	intron_variant	KIF20B	yes (1)	no		no	no	no		no	no	no	no	yes	yes	no	no	no	no		CEBPB, DMRT1, DMRT2, DMRT3, DMRT7, Evi-1	-		6.006	-	-		KIF20B; PANK1; RP11-80H5.9	KIF20B (7 tissues); LINC00865 (3 tissues); PANK1 (4 tissues); RP11-80H5.6 (1 tissue); RP11-80H5.9 (17 tissues)
		10-91500444-G-A	rs72818766	10	91500444	intron_variant	KIF20B	no	no		no	no	no		no	no	no	no	no	yes	no	no	no	no		-	-		0.086	-	-		KIF20B; PANK1; RP11-80H5.9	KIF20B (8 tissues); LINC00865 (4 tissues); PANK1 (4 tissues); RP11-80H5.6 (1 tissue); RP11-80H5.9 (18 tissues)
		10-91502023-G-T	rs56318555	10	91502023	intron_variant	KIF20B	no	no		no	no	no		no	no	no	no	no	no	no	no	no	no		Irf, Mef2, Pbx-1, Pbx3	-		0.337	-	-		KIF20B; PANK1; RP11-80H5.9	KIF20B (8 tissues); LINC00865 (4 tissues); PANK1 (4 tissues); RP11-80H5.6 (1 tissue); RP11-80H5.9 (18 tissues)
		10-91505293-T-C	rs140356782	10	91505293	intron_variant	KIF20B	no	no		no	no	no		no	no	no	no	no	no	no	no	no	no		Dbx1, Fox, Foxa, Foxd3, Foxf1, Foxi1, Foxj1, Foxj2, Foxk1, Foxl1, Foxo, Foxp1, Foxq1, HDAC2, Ncx, Pou3f2, Pou3f4, Sox, TATA, Zfp105	-		0.113	-	-		KIF20B; PANK1; RP11-80H5.9	KIF20B (6 tissues); LINC00865 (4 tissues); PANK1 (3 tissues); RP11-80H5.6 (1 tissue); RP11-80H5.9 (19 tissues)
		10-91505314-A-G	rs72818768	10	91505314	intron_variant	KIF20B	no	no		no	no	no		no	no	no	no	no	no	no	no	no	no		Cdx, Dbx1, Foxa, Foxc1, Foxj2, Foxk1, Foxl1, Foxp1, Hoxd8, Mef2, Ncx, Pax-4, Pou2f2, Pou3f2, TATA	-		0.513	-	-		KIF20B; PANK1; RP11-80H5.9	KIF20B (7 tissues); LINC00865 (3 tissues); PANK1 (4 tissues); RP11-80H5.6 (1 tissue); RP11-80H5.9 (17 tissues)
		10-91510321-A-G	rs72818770	10	91510321	intron_variant	KIF20B	no	no		no	no	no		no	no	no	no	no	no	no	no	no	yes		PLZF, Pax-6, TATA	-		2.444	-	-		KIF20B; PANK1; RP11-80H5.9	KIF20B (8 tissues); LINC00865 (4 tissues); PANK1 (4 tissues); RP11-80H5.6 (1 tissue); RP11-80H5.9 (18 tissues)
		10-91519921-C-T	rs72818773	10	91519921	intron_variant	KIF20B	no	no		no	no	no		no	no	no	no	no	no	no	no	no	no		Nkx6-1	-		0.783	-	-		KIF20B; PANK1; RP11-80H5.9	KIF20B (8 tissues); LINC00865 (4 tissues); PANK1 (4 tissues); RP11-80H5.6 (1 tissue); RP11-80H5.9 (18 tissues)
		10-91520817-T-C	rs72818774	10	91520817	intron_variant	KIF20B	no	no		no	no	no		no	no	no	no	no	no	no	no	no	no		-	-		9.849	-	-		KIF20B; PANK1; RP11-80H5.9	KIF20B (7 tissues); LINC00865 (3 tissues); PANK1 (4 tissues); RP11-80H5.6 (1 tissue); RP11-80H5.9 (17 tissues)
		10-91522548-A-G	rs34354493	10	91522548	missense_variant	KIF20B	no	no		no	no	no		no	no	no	no	no	no	no	no	no	no		Ik-1, Mrg, Myb, NF-kappaB, Pbx3, Tgif1	-		28.4	0.999	possibly_damaging(0.814)		KIF20B; PANK1; RP11-80H5.9	KIF20B (7 tissues); LINC00865 (4 tissues); PANK1 (4 tissues); RP11-80H5.6 (1 tissue); RP11-80H5.9 (18 tissues)
		10-91526181-A-T	rs11598015	10	91526181	intron_variant; missense_variant	KIF20B	no	no		no	no	no		no	no	no	no	no	no	no	no	no	no		Hdx, Pou2f2	-		8.883	-	unknown(0)		KIF20B; PANK1; RP11-80H5.9	KIF20B (8 tissues); LINC00865 (2 tissues); PANK1 (4 tissues); RP11-80H5.6 (1 tissue); RP11-80H5.9 (18 tissues)
		10-91532895-C-T	rs72818781	10	91532895	intron_variant	KIF20B	no	no		no	no	no		no	no	no	no	no	no	no	no	no	no		CEBPG, Ets, Gfi1, Gfi1b, Mrg1::Hoxa9, Myc	-		2.599	-	-		KIF20B; PANK1; RP11-80H5.9	KIF20B (8 tissues); LINC00865 (4 tissues); PANK1 (4 tissues); RP11-80H5.6 (1 tissue); RP11-80H5.9 (18 tissues)
		10-91549223-G-A	rs72818783	10	91549223	-	-	no	no		no	yes (1)	no		no	no	no	no	no	yes	no	no	no	yes		Foxj2, Foxp1, Hoxa10, Hoxb8, Pax-4, Sox	-		5.9	-	-		KIF20B; PANK1; RP11-80H5.9	KIF20B (7 tissues); LINC00865 (4 tissues); PANK1 (4 tissues); RP11-80H5.6 (1 tissue); RP11-80H5.9 (18 tissues)
		10-91559740-G-A	rs72818786	10	91559740	-	-	no	no		no	no	no		no	no	no	no	no	no	no	no	no	no		NF-AT	-		3.072	-	-		KIF20B; PANK1; RP11-80H5.9	KIF20B (8 tissues); LINC00865 (2 tissues); PANK1 (4 tissues); RP11-80H5.6 (1 tissue); RP11-80H5.9 (18 tissues)
		10-91567951-C-T	rs11594682	10	91567951	-	-	no	no		no	no	no		no	no	no	no	no	no	no	no	no	no		-	-		0.171	-	-		KIF20B; PANK1; RP11-80H5.9	KIF20B (8 tissues); LINC00865 (2 tissues); PANK1 (4 tissues); RP11-80H5.6 (1 tissue); RP11-80H5.9 (18 tissues)
		10-91571772-A-T	rs72818790	10	91571772	-	-	no	no		no	no	no		no	no	no	no	no	no	no	no	no	no		Cdx, Dbx1, Foxp1, HMG-IY, HNF1, Mef2, Ncx, PLZF, Pou2f2, Pou3f2, TATA, Zfp105	-		0.313	-	-		KIF20B; PANK1; RP11-80H5.9	KIF20B (6 tissues); LINC00865 (3 tissues); PANK1 (4 tissues); RP11-80H5.6 (1 tissue); RP11-80H5.9 (18 tissues)
		10-91573453-G-A	rs1326195	10	91573453	-	-	no	yes (1)		no	no	no		no	no	no	no	yes	yes	no	no	no	no		Irf, STAT, Sox	-		1.377	-	-		KIF20B; PANK1; RP11-80H5.9	KIF20B (6 tissues); LINC00865 (3 tissues); PANK1 (4 tissues); RP11-80H5.6 (1 tissue); RP11-80H5.9 (18 tissues)
		10-91574323-T-G	rs72818792	10	91574323	-	-	no	yes (1)		no	no	no		no	yes	no	no	yes	yes	no	no	no	no		Foxi1, Foxq1, Hoxa5, Sox	-		3.387	-	-		KIF20B; PANK1; RP11-80H5.9	KIF20B (4 tissues); LINC00865 (3 tissues); PANK1 (4 tissues); RP11-80H5.6 (1 tissue); RP11-80H5.9 (18 tissues)
		10-91574624-G-A	rs7071258	10	91574624	-	-	no	yes (1)		no	no	no		no	yes	no	no	yes	yes	no	no	no	no		MZF1::1-4, PLAG1, YY1	TCF7L2		0.488	-	-		KIF20B; PANK1; RP11-80H5.9	KIF20B (6 tissues); LINC00865 (4 tissues); PANK1 (4 tissues); RP11-80H5.6 (1 tissue); RP11-80H5.9 (16 tissues)
14q22.1	rs28611105	14-51359658-T-G	rs28611105	14	51359658	intron_variant	ABHD12B; PYGL	yes (1)	yes (9)		no	no	no		no	no	no	no	no	yes	no	no	no	no		Foxp1, Pax-4	-		6.034	-	-		ABHD12B; NIN; PYGL	ABHD12B (8 tissues); NIN (3 tissues); PYGL (9 tissues); RP11-218E20.5 (1 tissue); RP11-248J18.3 (1 tissue)
		14-51362970-T-C	rs28848529	14	51362970	intron_variant; intron_variant	ABHD12B; PYGL	yes (4)	yes (24)		no	no	no		no	no	no	no	yes	no	no	no	no	yes		PRDM1, SIX5, Znf143	-		1.605	-	-		ABHD12B; NIN; PYGL	ABHD12B (9 tissues); NIN (3 tissues); PYGL (12 tissues); RP11-218E20.5 (2 tissues); RP11-248J18.3 (1 tissue)
		14-51364371-T-C	rs12589665	14	51364371	intron_variant; intron_variant	ABHD12B; PYGL	yes (4)	yes (16)		no	no	no		no	no	no	no	yes	no	no	no	no	yes		Zfp410	-		2.722	-	-		ABHD12B; NIN; PYGL	ABHD12B (9 tissues); NIN (3 tissues); PYGL (12 tissues); RP11-218E20.5 (2 tissues); RP11-248J18.3 (1 tissue)
		14-51365348-C-T	rs885375	14	51365348	intron_variant	ABHD12B; PYGL	yes (2)	yes (11)		no	no	no		no	no	no	no	no	yes	no	no	no	no		DBP, EWSR1-FLI1, p53	-		2.583	-	-		ABHD12B; NIN; PYGL	ABHD12B (7 tissues); NIN (3 tissues); PYGL (12 tissues); RP11-218E20.5 (1 tissue); RP11-248J18.3 (1 tissue)
		14-51365731-C-T	rs58815153	14	51365731	intron_variant	ABHD12B; PYGL	yes (2)	yes (8)		no	no	no		no	no	no	no	no	yes	no	no	no	yes		GR, TATA, THAP1, YY1	-		4.802	-	-		ABHD12B; NIN; PYGL	ABHD12B (7 tissues); NIN (3 tissues); PYGL (12 tissues); RP11-218E20.5 (1 tissue); RP11-248J18.3 (1 tissue)
		14-51365749-A-G	rs12587819	14	51365749	intron_variant	ABHD12B; PYGL	yes (2)	yes (8)		no	no	no		no	no	no	no	no	yes	no	no	no	yes		Mef2, SIX5	-		5.846	-	-		ABHD12B; NIN; PYGL	ABHD12B (7 tissues); NIN (3 tissues); PYGL (12 tissues); RP11-218E20.5 (1 tissue); RP11-248J18.3 (1 tissue)
		14-51365836-G-A	rs12587893	14	51365836	intron_variant	ABHD12B; PYGL	yes (2)	yes (7)		no	no	no		no	no	no	no	no	yes	no	no	no	yes		BHLHE40, Ets, HNF4, Irf, RXRA, Rad21, SMC3, SP1, TATA	-		0.361	-	-		ABHD12B; NIN; PYGL	ABHD12B (9 tissues); NIN (3 tissues); PYGL (12 tissues); RP11-218E20.5 (2 tissues); RP11-248J18.3 (1 tissue)
		14-51365858-C-T	rs12587863	14	51365858	intron_variant	ABHD12B; PYGL	yes (2)	yes (7)		no	no	no		no	no	no	no	no	yes	no	no	no	yes		TCF12	-		0.482	-	-		ABHD12B; NIN; PYGL	ABHD12B (7 tissues); NIN (3 tissues); PYGL (12 tissues); RP11-218E20.5 (1 tissue); RP11-248J18.3 (1 tissue)
		14-51366575-C-T	rs6572708	14	51366575	intron_variant	ABHD12B; PYGL	no	yes (1)		no	no	no		no	no	no	no	no	no	no	no	no	no		E2A, Myf, RP58, Smad3	-		0.248	-	-		ABHD12B; NIN; PYGL	ABHD12B (7 tissues); NIN (3 tissues); PYGL (11 tissues); RP11-218E20.5 (2 tissues); RP11-248J18.3 (1 tissue)
		14-51366619-A-G	rs6572709	14	51366619	intron_variant	ABHD12B; PYGL	no	yes (1)		no	no	no		no	no	no	no	no	no	no	no	no	no		RFX5	-		0.012	-	-		ABHD12B; NIN; PYGL	ABHD12B (7 tissues); NIN (3 tissues); PYGL (12 tissues); RP11-218E20.5 (1 tissue); RP11-248J18.3 (1 tissue)
		14-51366743-G-T	rs7161495	14	51366743	intron_variant	ABHD12B; PYGL	no	yes (1)		no	no	no		no	no	no	no	no	no	no	no	no	yes		CTCF, Nr2f2, Rad21, TCF4	-		2.513	-	-		ABHD12B; NIN; PYGL; RP11-248J18.3	ABHD12B (9 tissues); NIN (3 tissues); PYGL (13 tissues); RP11-218E20.5 (2 tissues); RP11-248J18.3 (2 tissues)
		14-51366863-C-T	rs8023022	14	51366863	intron_variant	ABHD12B; PYGL	no	yes (1)		no	yes (1)	no		no	no	no	no	no	no	no	no	no	yes		GR, STAT, ZNF263	-		3.127	-	-		ABHD12B; NIN; PYGL	ABHD12B (7 tissues); NIN (3 tissues); PYGL (11 tissues); RP11-218E20.5 (2 tissues); RP11-248J18.3 (1 tissue)
		14-51368495-G-A	rs17123103	14	51368495	intron_variant; intron_variant	ABHD12B; PYGL	no	no		no	no	no		no	no	no	no	no	no	no	no	no	no		CTCF, HP1-site-factor, Sox, TAL1	-		6.451	-	-		ABHD12B; NIN; PYGL	ABHD12B (7 tissues); NIN (3 tissues); PYGL (11 tissues); RP11-218E20.5 (2 tissues); RP11-248J18.3 (1 tissue)
		14-51368610-A-G	rs28564871	14	51368610	missense_variant; intron_variant	ABHD12B; PYGL	no	no		no	no	no		no	no	no	no	no	no	no	no	no	no		Evi-1, OTX	-		18.57	0.835	benign(0)		ABHD12B; NIN; PYGL	ABHD12B (7 tissues); NIN (3 tissues); PYGL (11 tissues); RP11-218E20.5 (2 tissues); RP11-248J18.3 (1 tissue)
		14-51368756-T-A	rs28485307	14	51368756	intron_variant; intron_variant	ABHD12B; PYGL	no	no		no	no	no		no	no	no	no	no	no	no	no	no	no		Sox	-		5.922	-	-		ABHD12B; NIN; PYGL	ABHD12B (7 tissues); NIN (3 tissues); PYGL (11 tissues); RP11-218E20.5 (2 tissues); RP11-248J18.3 (1 tissue)
		14-51369151-G-A	rs12590515	14	51369151	intron_variant; intron_variant	ABHD12B; PYGL	no	no		no	no	no		no	no	no	no	no	no	no	no	no	no		Gfi1, Myb	-		3.364	-	-		ABHD12B; NIN; PYGL	ABHD12B (7 tissues); NIN (3 tissues); PYGL (11 tissues); RP11-218E20.5 (2 tissues); RP11-248J18.3 (1 tissue)
		14-51370539-A-G	rs17123107	14	51370539	intron_variant; intron_variant	ABHD12B; PYGL	no	no		no	no	no		no	no	no	no	no	no	no	no	no	no		MIF-1, RFX5, Sox	-		5.038	-	-		ABHD12B; NIN; PYGL	ABHD12B (7 tissues); NIN (3 tissues); PYGL (11 tissues); RP11-218E20.5 (2 tissues); RP11-248J18.3 (1 tissue)
		14-51370784-G-C	rs4901064	14	51370784	intron_variant; splice_region_variant,intron_variant	PYGL; ABHD12B	no	no		no	no	no		no	no	no	no	no	no	no	no	no	no		GR, STAT	GATA2, GATA3, TCF7L2		1.392	-	-		ABHD12B; NIN; PYGL	ABHD12B (7 tissues); NIN (3 tissues); PYGL (11 tissues); RP11-218E20.5 (2 tissues); RP11-248J18.3 (1 tissue)
		14-51371121-C-T	rs4901065	14	51371121	3_prime_UTR_variant; intron_variant	ABHD12B; PYGL	no	no		no	no	no		no	no	no	no	no	no	no	no	no	no		RREB-1	-		4.021	-	-		ABHD12B; NIN; PYGL	ABHD12B (7 tissues); NIN (3 tissues); PYGL (11 tissues); RP11-218E20.5 (2 tissues); RP11-248J18.3 (1 tissue)
		14-51371130-C-T	rs11157780	14	51371130	3_prime_UTR_variant; intron_variant	ABHD12B; PYGL	no	no		no	no	no		no	no	no	no	no	no	no	no	no	no		E2A, RREB-1, p300	-		8.56	-	-		ABHD12B; NIN; PYGL; RP11-248J18.3	ABHD12B (8 tissues); NIN (3 tissues); PYGL (13 tissues); RP11-218E20.5 (2 tissues); RP11-248J18.3 (2 tissues)
		14-51371150-C-T	rs11157781	14	51371150	3_prime_UTR_variant; intron_variant	ABHD12B; PYGL	no	no		no	no	no		no	no	no	no	no	no	no	no	no	no		Cdc5, Foxd3, Pdx1, Pou2f2, Sox	-		6.6	-	-		ABHD12B; NIN; PYGL	ABHD12B (7 tissues); NIN (3 tissues); PYGL (11 tissues); RP11-218E20.5 (2 tissues); RP11-248J18.3 (1 tissue)
		14-51371524-C-T	rs11157782	14	51371524	3_prime_UTR_variant; intron_variant	ABHD12B; PYGL	no	no		no	no	no		no	no	no	no	no	no	no	no	no	no		CDP, PLZF, Pou4f3, TCF4	-		3.376	-	-		ABHD12B; NIN; PYGL; RP11-248J18.3	ABHD12B (8 tissues); NIN (3 tissues); PYGL (13 tissues); RP11-218E20.5 (2 tissues); RP11-248J18.3 (2 tissues)
		14-51372103-C-G	rs1042266	14	51372103	3_prime_UTR_variant; downstream_gene_variant; intron_variant	PYGL; ABHD12B; PYGL	no	no		no	no	no		no	no	no	no	no	no	no	no	no	yes		GCNF, HNF4, Irf	-		2.67	-	-		ABHD12B; NIN; PYGL; RP11-248J18.3	ABHD12B (8 tissues); NIN (3 tissues); PYGL (13 tissues); RP11-218E20.5 (2 tissues); RP11-248J18.3 (2 tissues)
		14-51372333-A-G	rs1959527	14	51372333	downstream_gene_variant; intron_variant	ABHD12B; PYGL	no	no		no	no	no		no	yes	no	no	no	no	no	no	no	yes		Fox, Foxa, Foxi1, Foxl1, Foxq1, Hoxa10, Mef2, Zfp105	-		8.455	-	-		ABHD12B; NIN; PYGL; RP11-248J18.3	ABHD12B (6 tissues); NIN (2 tissues); PYGL (7 tissues); RP11-218E20.5 (1 tissue); RP11-248J18.3 (2 tissues)
		14-51372590-T-C	rs2027342	14	51372590	downstream_gene_variant; intron_variant	ABHD12B; PYGL	no	yes (1)		no	no	no		no	yes	no	no	no	no	no	no	no	yes		SETDB1	-		2.661	-	-		ABHD12B; NIN; PYGL	ABHD12B (4 tissues); NIN (2 tissues); PYGL (9 tissues); RP11-218E20.5 (1 tissue); RP11-248J18.3 (1 tissue)
		14-51372606-G-A	rs2027341	14	51372606	downstream_gene_variant; intron_variant	ABHD12B; PYGL	no	yes (1)		no	no	no		no	yes	no	no	no	no	no	no	no	yes		Hbp1, Maf, PU.1, Pou5f1	-		4.8	-	-		ABHD12B; NIN; PYGL	ABHD12B (4 tissues); NIN (2 tissues); PYGL (8 tissues); RP11-218E20.5 (1 tissue); RP11-248J18.3 (1 tissue)
		14-51375250-G-T	rs2356535	14	51375250	downstream_gene_variant; intron_variant	ABHD12B; PYGL	no	no		no	no	no		no	no	no	no	no	no	no	no	no	no		DEC	-		2.015	-	-		ABHD12B; NIN; PYGL	ABHD12B (8 tissues); NIN (2 tissues); PYGL (12 tissues); RP11-218E20.5 (1 tissue); RP11-248J18.3 (1 tissue)
		14-51376237-A-G	rs10132049	14	51376237	downstream_gene_variant; intron_variant	ABHD12B; PYGL	no	no		no	no	no		no	no	no	no	no	no	no	no	no	no		STAT, TCF4	-		1.268	-	-		ABHD12B; NIN; PYGL; RP11-248J18.3	ABHD12B (6 tissues); NIN (2 tissues); PYGL (8 tissues); RP11-218E20.5 (1 tissue); RP11-248J18.3 (2 tissues)
14q32.12	rs61975764	14-93014929-G-A	rs61975764	14	93014929	intron_variant	RIN3	no	no		no	yes (1)	no		no	no	no	no	yes	yes	no	no	no	yes		-	-		0.077	-	-		RIN3	RIN3 (12 tissues)
14q32.2	rs80158569	14-99782937-G-A	rs80158569	14	99782937	-	-	yes (4)	yes (24)		yes (3)	yes (4)	no		yes	no	no	no	yes	yes	no	yes	no	no		Nrf1, SRF, YY1	POLR2A, HDAC2, EP300, FOSL2, FOXA1, REST, TCF12, NFIC, RXRA, SP1, JUND, FOXA2, HNF4A, HNF4G, MYBL2, MXI1, TCF7L2, ARID3A		18.15	-	-		-	-
19p13.3	rs62131228	19-1157642-G-A	rs62131228	19	1157642	intron_variant	SBNO2	no	no		no	no	no		no	no	no	yes	no	no	no	no	no	no		-	-		0.671	-	-		-	ABCA7 (1 tissue)
20q13.31	rs6014965	20-55816126-T-C	rs186660	20	55816126	intron_variant	BMP7	no	no		no	yes (1)	no		no	yes	yes	no	yes	no	no	no	no	yes		GR, Zfp691	-		4.707	-	-		-	BMP7 (3 tissues)
		20-55817829-T-C	rs162320	20	55817829	intron_variant	BMP7	no	yes (1)		no	no	no		no	yes	no	no	no	no	no	no	no	yes		-	-		0.062	-	-		-	BMP7 (3 tissues)
		20-55818350-T-C	rs463955	20	55818350	intron_variant	BMP7	no	yes (2)		no	no	no		no	no	no	no	no	no	no	no	no	yes		-	-		1.655	-	-		-	BMP7 (3 tissues); RP4-813D12.3 (1 tissue)
		20-55822649-C-A	rs1998190	20	55822649	intron_variant	BMP7	no	yes (5)		no	no	no		no	yes	yes	no	yes	no	yes	no	no	yes		-	-		2.027	-	-		-	BMP7 (3 tissues); RP4-813D12.3 (1 tissue)
		20-55824147-A-G	rs6025465	20	55824147	intron_variant	BMP7	no	yes (1)		no	no	no		no	yes	no	no	no	yes	no	no	no	no		AP-1, BHLHE40, CACD, CHD2, E2F, Egr-1, Ets, HEY1, NRSF, Nrf1, Pax-4, Sin3Ak-20, YY1, Zfp161	-		3.829	-	-		-	BMP7 (3 tissues); BMP7-AS1 (1 tissue)
		20-55824533-A-G	rs182784	20	55824533	intron_variant	BMP7	no	yes (1)		no	no	no		no	yes	no	no	yes	yes	no	no	no	no		-	-		4.393	-	-		-	BMP7 (3 tissues)
		20-55825693-A-G	rs6070035	20	55825693	intron_variant	BMP7	no	yes (6)		no	no	no		no	yes	no	no	no	yes	no	no	no	no		Foxp1, HDAC2, TCF4	CTCF		4.74	-	-		-	BMP7 (3 tissues)
		20-55827144-C-A	rs2180783	20	55827144	intron_variant	BMP7	no	yes (7)		no	no	no		no	yes	no	no	no	no	no	no	no	no		CEBPB, RFX5, SREBP	-		0.998	-	-		-	BMP7 (3 tissues); BMP7-AS1 (1 tissue)
		20-55830803-T-C	rs1136892	20	55830803	intron_variant	BMP7	no	yes (1)		no	no	no		no	yes	no	no	yes	no	no	no	no	no		Hdx	-		0.384	-	-		-	BMP7 (3 tissues)
		20-55831203-A-G	rs6014965	20	55831203	intron_variant	BMP7	no	yes (2)		no	no	no		no	yes	no	no	no	no	no	no	no	no		TATA	-		7.293	-	-		-	BMP7 (3 tissues); RAE1 (1 tissue)
		20-55832409-A-G	rs2426707	20	55832409	intron_variant	BMP7	no	yes (2)		no	no	no		no	yes	yes	no	no	no	no	no	no	no		Foxp1, IRC900814, Pou3f2	-		0.718	-	-		-	BMP7 (3 tissues)
		20-55835111-G-C	rs4811832	20	55835111	intron_variant	BMP7	no	yes (4)		no	no	no		no	yes	yes	no	yes	no	no	no	yes	yes		Ets, GATA, Myc, NF-kappaB, Pax-2	EZH2		3.043	-	-		-	BMP7 (3 tissues)
22q13.31	rs736037	22-45696695-G-A	rs5766632	22	45696695	downstream_gene_variant	UPK3A	no	yes (1)		no	no	no		no	no	no	no	no	yes	no	no	no	no		Ik-1, STAT	-		6.05	-	-		FAM118A	FAM118A (36 tissues); RIBC2 (17 tissues); SMC1B (1 tissue); UPK3A (1 tissue)
		22-45698149-T-A	rs9615099	22	45698149	-	-	yes (2)	yes (17)		no	yes (1)	no		yes	no	no	yes	yes	yes	no	no	no	no		Zfp105	CTCF, EP300, FOSL2, FOXA1, TCF12, BATF, CEBPB, SPI1, JUND, FOXA2, FOS, MXI1, SMC3, ARID3A		4.044	-	-		-	-
		22-45698221-C-G	rs9615100	22	45698221	-	-	yes (3)	yes (17)		no	no	no		yes	no	no	yes	yes	yes	no	no	no	no		GR, VDR	EP300, FOSL2, BATF, CEBPB, JUND, FOS, MXI1, ARID3A		0.058	-	-		FAM118A	FAM118A (36 tissues); RIBC2 (17 tissues); SMC1B (1 tissue); UPK3A (1 tissue)
		22-45699780-C-T	rs34395311	22	45699780	-	-	yes (2)	yes (7)		no	no	no		no	no	no	no	yes	yes	no	no	no	no		E2A, TBX5, ZEB1	-		0.725	-	-		FAM118A	FAM118A (35 tissues); RIBC2 (18 tissues); UPK3A (1 tissue)
		22-45714937-T-C	rs6006984	22	45714937	intron_variant	FAM118A	yes (2)	yes (16)		no	no	no		yes	yes	yes	yes	yes	yes	no	yes	yes	yes		GR, HMG-IY, Zfp187	EP300, EBF1, IRF4, MTA3, NFIC, RUNX3, TBP		3.961	-	-		FAM118A	CTA-268H5.14 (1 tissue); FAM118A (38 tissues); RIBC2 (20 tissues); SMC1B (1 tissue); UPK3A (1 tissue)
		22-45715608-C-T	rs6519922	22	45715608	intron_variant	FAM118A	no	yes (10)		no	no	no		no	no	yes	yes	yes	yes	no	yes	yes	yes		DMRT3, DMRT4	-		4.58	-	-		FAM118A	CTA-268H5.14 (1 tissue); FAM118A (38 tissues); RIBC2 (20 tissues); SMC1B (1 tissue); UPK3A (1 tissue)
		22-45715624-A-G	rs6519923	22	45715624	intron_variant	FAM118A	no	yes (10)		no	no	no		no	no	yes	yes	yes	yes	no	yes	yes	yes		PU.1	-		6.14	-	-		FAM118A	CTA-268H5.14 (1 tissue); FAM118A (38 tissues); RIBC2 (20 tissues); SMC1B (1 tissue); UPK3A (1 tissue)
		22-45716397-A-G	rs8138866	22	45716397	intron_variant	FAM118A	no	yes (2)		no	no	no		no	no	yes	yes	yes	yes	no	yes	no	yes		NF-E2, VDR, Zbtb3	-		1.06	-	-		FAM118A	CTA-268H5.14 (1 tissue); FAM118A (37 tissues); RIBC2 (19 tissues); SMC1B (1 tissue); UPK3A (1 tissue)
		22-45717524-C-T	rs6007587	22	45717524	intron_variant	FAM118A	no	no		no	no	no		yes	no	yes	no	no	yes	no	no	no	no		Nkx2, Nr2f2, Pax-5, RXRA	-		3.81	-	-		FAM118A	CTA-268H5.14 (1 tissue); FAM118A (38 tissues); RIBC2 (21 tissues); SMC1B (1 tissue); UPK3A (1 tissue)
		22-45717859-C-T	rs720682	22	45717859	intron_variant	FAM118A	no	no		no	no	no		yes	no	yes	no	no	yes	no	no	yes	no		HNF4, NRSF	EBF1		0.076	-	-		FAM118A	CTA-268H5.14 (1 tissue); FAM118A (38 tissues); RIBC2 (21 tissues); SMC1B (1 tissue); UPK3A (1 tissue)
		22-45718041-A-G	rs1473953	22	45718041	intron_variant	FAM118A	no	no		no	no	no		yes	no	yes	no	no	yes	no	no	no	no		GR, HNF4, Smad4	EBF1		0.645	-	-		FAM118A	CTA-268H5.14 (1 tissue); FAM118A (38 tissues); RIBC2 (21 tissues); SMC1B (1 tissue); UPK3A (1 tissue)
		22-45723116-A-G	rs6006985	22	45723116	intron_variant	FAM118A	no	no		no	no	no		no	no	no	no	no	no	no	no	no	no		GATA, Lmo2-complex	-		3.981	-	-		FAM118A	CTA-268H5.14 (1 tissue); FAM118A (37 tissues); RIBC2 (20 tissues); SMC1B (1 tissue); UPK3A (1 tissue)
		22-45723320-C-A	rs6006987	22	45723320	intron_variant	FAM118A	no	no		no	yes (1)	no		no	no	no	no	no	no	no	no	no	no		NF-E2, NRSF, Pax-5, SZF1-1	-		0.209	-	-		FAM118A	CTA-268H5.14 (1 tissue); FAM118A (38 tissues); RIBC2 (21 tissues); SMC1B (1 tissue); UPK3A (1 tissue)
		22-45723696-G-C	rs6007591	22	45723696	intron_variant	FAM118A	yes (1)	no		no	no	no		yes	no	no	no	no	yes	no	no	no	no		Ets, TEF	-		0.641	-	-		FAM118A	CTA-268H5.14 (1 tissue); FAM118A (39 tissues); RIBC2 (19 tissues); SMC1B (1 tissue); UPK3A (1 tissue)
		22-45723807-G-C	rs11556482	22	45723807	missense_variant	FAM118A	yes (1)	yes (1)		yes (1)	no	no		no	no	no	no	no	yes	no	no	no	no		NRSF, SEF-1, SMC3	-		2.811	0.31	benign(0)		FAM118A	CTA-268H5.14 (1 tissue); FAM118A (38 tissues); RIBC2 (21 tissues); SMC1B (1 tissue); UPK3A (1 tissue)
		22-45723842-G-A	rs17851057	22	45723842	synonymous_variant	FAM118A	yes (1)	yes (1)		yes (1)	no	no		no	no	no	no	no	yes	no	no	no	no		KAP1, NRSF	-		15.1	-	-		FAM118A	CTA-268H5.14 (1 tissue); FAM118A (38 tissues); RIBC2 (21 tissues); SMC1B (1 tissue); UPK3A (1 tissue)
		22-45724727-G-A	rs6007592	22	45724727	3_prime_UTR_variant; intron_variant	FAM118A	no	no		no	no	no		yes	yes	yes	yes	no	yes	no	yes	yes	yes		Bsx, CHX10, Dlx2, Dlx3, Dlx5, En-1, Hoxa3, Hoxa5, Hoxb3, Msx-1, Ncx, Nobox, Pax-3, RXRA, Rhox11, Vax2	REST		3.113	-	-		FAM118A	CTA-268H5.14 (1 tissue); FAM118A (41 tissues); RIBC2 (21 tissues); SMC1B (1 tissue); UPK3A (1 tissue)
		22-45724999-G-A	rs736037	22	45724999	3_prime_UTR_variant; intron_variant	FAM118A	no	no		no	no	no		yes	yes	yes	yes	yes	yes	no	yes	yes	yes		AP-1, Pax-8, Pou5f1, RXRA	-		3.823	-	-		FAM118A	CTA-268H5.14 (1 tissue); FAM118A (40 tissues); RIBC2 (19 tissues); SMC1B (1 tissue); UPK3A (1 tissue)
		22-45725106-T-C	rs6006988	22	45725106	3_prime_UTR_variant; intron_variant	FAM118A	no	no		no	no	no		yes	yes	yes	yes	yes	yes	no	yes	yes	yes		AP-1, Foxo	-		6.453	-	-		FAM118A	CTA-268H5.14 (1 tissue); FAM118A (41 tissues); RIBC2 (21 tissues); SMC1B (1 tissue); UPK3A (1 tissue)
		22-45725276-G-A	rs2350628	22	45725276	3_prime_UTR_variant; intron_variant	FAM118A	no	no		no	no	no		yes	yes	yes	yes	yes	yes	no	yes	yes	yes		Foxo, HDAC2, HMG-IY, HNF1, Zfp105	-		1.439	-	-		FAM118A	CTA-268H5.14 (1 tissue); FAM118A (41 tissues); RIBC2 (21 tissues); SMC1B (1 tissue); UPK3A (1 tissue)
		22-45725392-T-C	rs742013	22	45725392	intron_variant	FAM118A	no	no		no	no	no		yes	yes	yes	yes	yes	yes	no	yes	yes	yes		HEN1, Nkx2	-		0.543	-	-		FAM118A	CTA-268H5.14 (1 tissue); FAM118A (40 tissues); RIBC2 (19 tissues); SMC1B (1 tissue); UPK3A (1 tissue)
		22-45725524-C-T	rs742014	22	45725524	intron_variant	FAM118A	no	no		no	yes (1)	no		yes	yes	yes	yes	yes	no	no	yes	yes	yes		PU.1, Pax-5, Rad21, SIX5, SP1, VDR, Znf143	REST, USF1, YY1		0.286	-	-		FAM118A	CTA-268H5.14 (1 tissue); FAM118A (40 tissues); RIBC2 (19 tissues); SMC1B (1 tissue); UPK3A (1 tissue)
		22-45725600-A-G	rs736702	22	45725600	5_prime_UTR_variant; intron_variant	FAM118A	no	no		no	yes (1)	no		yes	yes	yes	yes	yes	no	no	yes	yes	yes		Smad4	REST, USF1, YY1, RAD21, GATA2		5.317	-	-		FAM118A	CTA-268H5.14 (1 tissue); FAM118A (40 tissues); RIBC2 (19 tissues); SMC1B (1 tissue); UPK3A (1 tissue)
		22-45727565-T-G	rs1569414	22	45727565	intron_variant	FAM118A	no	no		no	yes (1)	no		yes	yes	yes	no	no	yes	no	no	yes	no		Mrg, SIX5	-		0.405	-	-		FAM118A	CTA-268H5.14 (1 tissue); FAM118A (40 tissues); RIBC2 (19 tissues); SMC1B (1 tissue); UPK3A (1 tissue)
		22-45727688-C-A	rs1569415	22	45727688	intron_variant	FAM118A	no	no		no	no	no		yes	yes	no	no	no	yes	no	no	yes	no		-	-		0.523	-	-		FAM118A; RIBC2	CTA-268H5.14 (1 tissue); FAM118A (38 tissues); RIBC2 (22 tissues); SMC1B (2 tissues); UPK3A (1 tissue)
		22-45728370-G-A	rs6007594	22	45728370	missense_variant	FAM118A	no	no		no	no	no		yes	yes	no	no	no	yes	no	no	yes	no		-	-		24.8	0.999	probably_damaging(0.934)		FAM118A	CTA-268H5.14 (1 tissue); FAM118A (41 tissues); RIBC2 (21 tissues); SMC1B (2 tissues); UPK3A (1 tissue)
		22-45734860-T-C	rs3788649	22	45734860	intron_variant	FAM118A	no	no		no	no	no		no	yes	no	no	no	no	no	no	no	yes		AP-2, BDP1, CACD, CTCF, ELF1, Ets, INSM1, Myc, Pou2f2, Rad21, SMC3, Sp4, TCF12, Znf143	-		2.923	-	-		FAM118A	FAM118A (37 tissues); RIBC2 (19 tissues)
aOverlap with transcription factor ChIP-seq peaks in CRC cell lines HCT-116 and Caco-2 is indicated.

## Sheet: Suppl. Table 6
Supplementary Table 6. Association results for SNP rs1446585 at the LCT locus for the six data sets included in the GWAS meta-analysis for the distal/left-sided CRC case subgroup.
Data Set	Alleles (risk/other)	RAF (%)	OR	95% CI	P	r2	N cases	N controls
Pooled data set 1	G/A	0.357	1.03	(0.98-1.08)	0.258	1.041	6344	13739
Pooled data set 2	G/A	0.527	1.11	(1.06-1.17)	7e-06	1.321	11952	12124
Illumina Oncoarray+custom iSelect	G/A	0.364	1.07	(1.01-1.13)	0.0199	1	5057	12000
Illumina OmniExpressExome	G/A	0.34	1	(0.93-1.08)	0.982	0.999	2695	4115
UK Biobank	G/A	0.239	1.1	(1.04-1.17)	0.00144	1.073	3559	21407
CORSA_1	G/A	0.476	1.08	(0.94-1.25)	0.263	0.948	956	774
A detailed description of the data sets is provided in Huyghe et al. Alleles are on the + strand. RAF, risk allele frequency; OR, odds (log-additive) ratio estimate for the risk allele; 95% CI, 95% confidence interval; P, logistic regression-based likelihood-ratio test P-value; r2, imputation quality.

## Sheet: Suppl. Table 7
Supplementary Table 7. Association results by primary tumor anatomic subsite and multinomial modeling analysis results for the lead SNPs of the 96 previously published independent CRC association signals.
Locus	Nearby gene(s)	rsID	Tumor site	Chrom.	Build37	Alleles (risk/other)	RAF	OR	CI	P	Phet	Best model (BIC)
1p36.12	WNT4; CDC42	rs72647484	Proximal colon	1	22587728	T/C	91.07	1.06	(1.01-1.11)	0.025	0.74	S3_PDR
			Distal colon					1.07	(1.02-1.13)	0.0058
			Rectal					1.05	(1.00-1.10)	0.057
1p34.3	SF3A3; FHL3	rs4360494	Proximal colon	1	38455891	G/C	45.39	1.06	(1.03-1.09)	5.9e-05	0.47	S3_PDR
			Distal colon					1.05	(1.02-1.08)	0.00081
			Rectal					1.04	(1.01-1.07)	0.0086
1p32.3	TTC22	rs12144319	Proximal colon	1	55246035	C/T	25.48	1.07	(1.04-1.11)	5.8e-06	0.21	S3_PDR
			Distal colon					1.09	(1.05-1.12)	2.5e-07
			Rectal					1.06	(1.02-1.09)	0.00055
1q25.3	LAMC1	rs6678517	Proximal colon	1	183002639	A/G	58.98	1.04	(1.01-1.07)	0.0039	0.0019	S3_PDR
			Distal colon					1.07	(1.04-1.10)	3.2e-06
			Rectal					1.11	(1.08-1.14)	2.5e-14
1q41	DUSP10	rs17011141	Proximal colon	1	222112634	G/A	20.87	1.07	(1.04-1.11)	3.5e-05	0.0068	S3_PDR
			Distal colon					1.14	(1.10-1.18)	9.6e-15
			Rectal					1.1	(1.07-1.14)	9.5e-09
2q24.2	TANC1	rs448513	Proximal colon	2	159964552	C/T	32.6	1.05	(1.02-1.08)	0.0023	0.88	S3_PDR
			Distal colon					1.05	(1.02-1.09)	0.00031
			Rectal					1.06	(1.03-1.09)	0.00025
2q33.1	SATB2	rs11884596	Proximal colon	2	199612407	C/T	38.23	1.05	(1.02-1.08)	0.00043	0.38	S3_PDR
			Distal colon					1.06	(1.03-1.09)	6.4e-05
			Rectal					1.07	(1.04-1.10)	9.8e-07
2q33.1	SATB2	rs983402	Proximal colon	2	199781586	T/C	33.12	1.04	(1.01-1.07)	0.016	2e-05	S1_R
			Distal colon					1.06	(1.02-1.09)	0.00035
			Rectal					1.12	(1.08-1.15)	6e-14
2q35	PNKD; TMBIM1	rs3731861	Proximal colon	2	219191256	T/C	62.95	1.06	(1.03-1.09)	1.5e-05	0.68	S3_PDR
			Distal colon					1.08	(1.05-1.11)	6.2e-08
			Rectal					1.06	(1.03-1.09)	3.5e-05
3p22.1	CTNNB1	rs35470271	Proximal colon	3	40915239	G/A	15.4	1.02	(0.99-1.06)	0.22	9.8e-08	S2_DR
			Distal colon					1.12	(1.08-1.16)	4.6e-09
			Rectal					1.16	(1.12-1.20)	4.1e-15
3p14.1	LRIG1	rs6781752	Proximal colon	3	66365163	A/G	20.5	1.08	(1.04-1.11)	1.9e-05	0.38	S3_PDR
			Distal colon					1.04	(1.01-1.08)	0.013
			Rectal					1.05	(1.02-1.09)	0.0026
3q13.2	BOC	rs72942485	Proximal colon	3	112999560	G/A	98.02	1.1	(0.99-1.21)	0.066	0.011	S2_DR
			Distal colon					1.28	(1.16-1.42)	2.4e-06
			Rectal					1.29	(1.17-1.44)	1.1e-06
3q22.2	SLCO2A1	rs10049390	Proximal colon	3	133701119	A/G	73.53	1.05	(1.02-1.09)	0.0012	0.13	S3_PDR, S2_PD
			Distal colon					1.08	(1.05-1.11)	3.3e-06
			Rectal					1.03	(1.00-1.07)	0.047
3q26.2	TERC; MYNN	rs9876206	Proximal colon	3	169517436	C/T	75.07	1.06	(1.02-1.09)	0.00078	0.9	S3_PDR
			Distal colon					1.04	(1.01-1.08)	0.0081
			Rectal					1.04	(1.01-1.08)	0.0082
4q22.2	ATOH1; SMARCAD1; BMPR1B	rs13149359	Proximal colon	4	94938618	A/C	36.63	1.04	(1.01-1.07)	0.0039	0.46	S3_PDR
			Distal colon					1.05	(1.02-1.08)	0.00041
			Rectal					1.07	(1.04-1.10)	3.5e-06
4q24	TET2	rs1391441	Proximal colon	4	106128760	A/G	67.2	1.04	(1.01-1.07)	0.011	0.049	S3_PDR, S2_DR
			Distal colon					1.08	(1.05-1.11)	2.6e-07
			Rectal					1.07	(1.04-1.10)	1.7e-06
4q31.21	HHIP	rs11727676	Proximal colon	4	145659064	C/T	9.8	1.1	(1.05-1.15)	5.6e-05	0.61	S3_PDR
			Distal colon					1.11	(1.06-1.16)	1.9e-05
			Rectal					1.08	(1.03-1.13)	0.0009
5p15.33	TERT	rs78368589	Proximal colon	5	1240204	T/C	5.97	1.21	(1.15-1.28)	1.6e-11	0.1	S3_PDR
			Distal colon					1.11	(1.04-1.17)	0.00071
			Rectal					1.13	(1.07-1.20)	3.2e-05
5p15.33	TERT; CLPTM1L	rs2735940	Proximal colon	5	1296486	G/A	49.52	1.1	(1.07-1.13)	8.4e-13	0.29	S3_PDR
			Distal colon					1.08	(1.06-1.11)	6.8e-09
			Rectal					1.11	(1.08-1.14)	4.4e-15
5p13.1	LINC00603; PTGER4	rs7708610	Proximal colon	5	40102443	A/G	35.64	1.05	(1.02-1.08)	0.00034	0.56	S3_PDR
			Distal colon					1.04	(1.01-1.07)	0.0033
			Rectal					1.03	(1.00-1.06)	0.034
5p13.1	LINC00603; PTGER4	rs12514517	Proximal colon	5	40280076	A/G	28.8	1.07	(1.04-1.10)	1.2e-05	0.01	S3_PDR
			Distal colon					1.12	(1.09-1.15)	1.6e-13
			Rectal					1.1	(1.07-1.13)	4e-10
5q21.1	RGMB; CHD1	rs145364999	Proximal colon	5	98206082	T/A	99.69	1.62	(1.19-2.21)	0.0021	0.71	S3_PDR
			Distal colon					1.74	(1.26-2.42)	0.00083
			Rectal					1.82	(1.32-2.51)	0.00028
5q22.2	APC	rs755229494	Proximal colon	5	112097351	G/A	0.11	0.94	(0.70-1.27)	0.7	2.3e-10	S2_DR
			Distal colon					2.47	(1.96-3.10)	1.5e-14
			Rectal					2.42	(1.89-3.10)	2.7e-12
5q31.1	PITX1; H2AFY	rs4976270	Proximal colon	5	134467220	C/T	55.01	1.11	(1.08-1.14)	1.8e-13	0.0022	S3_PDR
			Distal colon					1.07	(1.04-1.10)	4e-06
			Rectal					1.04	(1.02-1.07)	0.0022
6p21.32	HLA-B; MICA; MICB; NFKBIL1; TNF	rs2516420	Proximal colon	6	31449620	C/T	92.63	1.14	(1.08-1.20)	3.7e-06	0.0022	S2_PD
			Distal colon					1.11	(1.05-1.17)	0.0002
			Rectal					1.03	(0.98-1.08)	0.3
6p21.32	HLA-DRB1; HLA-DQA1	rs9271695	Proximal colon	6	32593080	G/A	79.54	1.07	(1.03-1.11)	0.00038	0.0051	S3_PDR
			Distal colon					1.16	(1.12-1.20)	1.1e-14
			Rectal					1.11	(1.07-1.15)	6.2e-09
6p21.31	FKBP5; TEAD3	rs16878812	Proximal colon	6	35569562	A/G	88.61	1.09	(1.05-1.14)	3.9e-05	0.29	S3_PDR
			Distal colon					1.07	(1.02-1.12)	0.0031
			Rectal					1.06	(1.01-1.10)	0.0098
6p21.2	CDKN1A	rs9470361	Proximal colon	6	36623379	A/G	24.88	1.02	(0.99-1.06)	0.14	0.00016	S2_DR
			Distal colon					1.07	(1.04-1.10)	3.5e-05
			Rectal					1.1	(1.06-1.13)	2.1e-09
6p21.1	TFEB	rs62396735	Proximal colon	6	41702582	C/T	29.08	1	(0.98-1.04)	0.76	0.08	S2_DR
			Distal colon					1.03	(1.00-1.07)	0.026
			Rectal					1.04	(1.01-1.07)	0.0073
6p12.1	BMP5	rs62404966	Proximal colon	6	55712124	C/T	76.23	1.06	(1.02-1.09)	0.00085	0.21	S3_PDR
			Distal colon					1.07	(1.03-1.10)	5.8e-05
			Rectal					1.09	(1.05-1.12)	2.1e-07
7p13	TBRG4	rs12672022	Proximal colon	7	45136423	T/C	83.45	1.07	(1.03-1.11)	0.0002	0.54	S3_PDR
			Distal colon					1.07	(1.03-1.11)	0.00034
			Rectal					1.05	(1.01-1.09)	0.012
8q23.3	EIF3H	rs16892766	Proximal colon	8	117630683	C/A	8.29	1.16	(1.10-1.21)	1.2e-09	0.23	S3_PDR
			Distal colon					1.2	(1.14-1.26)	2.3e-14
			Rectal					1.23	(1.18-1.29)	4.1e-19
8q23.3	EIF3H	rs6469654	Proximal colon	8	117632965	C/G	77.12	1.02	(0.99-1.06)	0.17	0.44	S2_PR, S3_PDR
			Distal colon					1.01	(0.98-1.04)	0.49
			Rectal					1.03	(1.00-1.06)	0.055
8q23.3	EIF3H	rs117079142	Proximal colon	8	117790914	A/C	4.32	1.19	(1.12-1.27)	7.1e-08	0.96	S3_PDR
			Distal colon					1.18	(1.11-1.26)	4e-07
			Rectal					1.18	(1.10-1.25)	4.4e-07
8q24.21	MYC	rs6983267	Proximal colon	8	128413305	G/T	52.28	1.16	(1.13-1.19)	6.2e-26	0.89	S3_PDR
			Distal colon					1.16	(1.13-1.20)	1.8e-27
			Rectal					1.17	(1.14-1.20)	3.5e-30
8q24.21	MYC	rs4313119	Proximal colon	8	128571855	G/T	74.86	1.06	(1.03-1.09)	0.00018	0.86	S3_PDR
			Distal colon					1.07	(1.03-1.10)	7.3e-05
			Rectal					1.07	(1.03-1.10)	4.6e-05
9p21.3	ANRIL; CDKN2A; CDKN2B	rs1537372	Proximal colon	9	22103183	G/T	56.92	1.03	(1.00-1.05)	0.073	0.0062	S2_DR
			Distal colon					1.07	(1.04-1.10)	7.5e-06
			Rectal					1.07	(1.04-1.10)	4.3e-07
9q22.33	GALNT12; TGFBR1	rs34405347	Proximal colon	9	101679752	T/G	90.34	1.05	(1.00-1.10)	0.037	0.065	S2_DR, S3_PDR
			Distal colon					1.09	(1.04-1.15)	0.00023
			Rectal					1.11	(1.06-1.16)	1.6e-05
9q31.3	LPAR1	rs10980628	Proximal colon	9	113671403	C/T	21.06	1.03	(1.00-1.06)	0.093	0.026	S2_DR
			Distal colon					1.08	(1.04-1.11)	2e-05
			Rectal					1.09	(1.06-1.13)	1.6e-07
10p14	GATA3	rs11255841	Proximal colon	10	8739580	T/A	70.3	1.03	(1.00-1.06)	0.084	1.7e-08	S2_DR
			Distal colon					1.13	(1.10-1.17)	3.4e-16
			Rectal					1.13	(1.10-1.17)	2.2e-16
10q11.23	A1CF; PRKG1	rs10821907	Proximal colon	10	52648454	C/T	82.76	1.07	(1.03-1.11)	0.00029	0.46	S3_PDR
			Distal colon					1.08	(1.04-1.12)	1.9e-05
			Rectal					1.06	(1.03-1.10)	0.0007
10q22.3	ZMIZ1-AS1; ZMIZ1; POLR3A	rs704017	Proximal colon	10	80819132	G/A	58.46	1.12	(1.09-1.15)	2.4e-15	0.0058	S3_PDR
			Distal colon					1.05	(1.02-1.08)	0.0003
			Rectal					1.08	(1.05-1.11)	9e-09
10q24.2	SnoU13; COX15; CNNM1; WNT8B; NKX2-3	rs11190164	Proximal colon	10	101351704	G/A	26.26	1.07	(1.04-1.11)	7.8e-06	0.28	S3_PDR
			Distal colon					1.1	(1.07-1.14)	1.7e-09
			Rectal					1.08	(1.04-1.11)	2.4e-06
10q25.2	VTI1A	rs12246635	Proximal colon	10	114288619	C/T	9.83	1.08	(1.03-1.13)	0.0014	0.052	S3_PDR, S2_DR
			Distal colon					1.13	(1.08-1.18)	2.5e-07
			Rectal					1.13	(1.08-1.18)	1.8e-07
10q25.2	TCF7L2	rs11196170	Proximal colon	10	114722621	A/G	21.78	1.04	(1.01-1.08)	0.014	0.31	S3_PDR
			Distal colon					1.07	(1.04-1.11)	2.2e-05
			Rectal					1.03	(1.00-1.07)	0.039
11q12.2	MYRF; FEN1; FADS1	rs174533	Proximal colon	11	61549025	G/A	67.39	1.05	(1.02-1.08)	0.00089	0.069	S3_PDR
			Distal colon					1.09	(1.05-1.12)	4.2e-08
			Rectal					1.05	(1.02-1.09)	0.00031
11q13.4	POLD3	rs7121958	Proximal colon	11	74280012	G/T	51.05	1.05	(1.02-1.08)	0.0004	0.00084	S2_DR, S3_PDR
			Distal colon					1.12	(1.09-1.15)	3.1e-16
			Rectal					1.09	(1.06-1.12)	2.7e-10
11q13.4	POLD3	rs61389091	Proximal colon	11	74427921	C/T	96.06	1.13	(1.05-1.21)	0.00066	0.00053	S2_DR, S3_PDR
			Distal colon					1.29	(1.20-1.40)	2e-11
			Rectal					1.26	(1.17-1.36)	3.9e-10
11q22.1	ANGPTL5	rs2186607	Proximal colon	11	101656397	T/A	51.78	1.06	(1.04-1.09)	7.2e-06	0.22	S3_PDR
			Distal colon					1.07	(1.04-1.10)	1.3e-06
			Rectal					1.04	(1.01-1.07)	0.0042
11q23.1	c11orf53; COLCA1; COLCA2	rs3087967	Proximal colon	11	111156836	T/C	29.11	1.03	(1.00-1.06)	0.032	6e-14	S2_DR
			Distal colon					1.16	(1.13-1.20)	3.4e-23
			Rectal					1.18	(1.15-1.22)	8.6e-30
12p13.32	CCND2	rs35808169	Proximal colon	12	4368607	C/T	17.21	1.09	(1.05-1.13)	7.4e-06	0.23	S3_PDR
			Distal colon					1.09	(1.05-1.13)	1.9e-06
			Rectal					1.06	(1.02-1.10)	0.0027
12p13.32	CCND2	rs3217810	Proximal colon	12	4388271	T/C	12.53	1.2	(1.15-1.26)	5.2e-18	0.0089	S3_PDR
			Distal colon					1.12	(1.07-1.17)	2.8e-07
			Rectal					1.09	(1.04-1.13)	0.00016
12p13.32	CCND2	rs3217874	Proximal colon	12	4400808	T/C	42.82	1.1	(1.07-1.13)	3.9e-11	0.14	S3_PDR
			Distal colon					1.07	(1.04-1.10)	1.4e-06
			Rectal					1.07	(1.04-1.10)	5.1e-06
12p13.31	CD9	rs2250430	Proximal colon	12	6421174	T/A	70.95	1.06	(1.03-1.10)	0.00013	0.82	S3_PDR
			Distal colon					1.08	(1.04-1.11)	7.5e-06
			Rectal					1.06	(1.02-1.09)	0.0006
12p13.2	ETV6	rs2710310	Proximal colon	12	12035649	C/T	75.96	1.02	(0.99-1.05)	0.3	0.24	S2_PR
			Distal colon					1	(0.96-1.03)	0.83
			Rectal					1.02	(0.98-1.05)	0.3
12q12	PRICKLE1	rs11610543	Proximal colon	12	43134191	G/A	50.13	1.05	(1.03-1.08)	0.00012	0.0022	S2_PD, S3_PDR
			Distal colon					1.09	(1.06-1.12)	9.6e-10
			Rectal					1.03	(1.00-1.06)	0.047
12q13.12	DIP2B; ATF1	rs12372718	Proximal colon	12	51171090	G/A	39.24	1.08	(1.05-1.11)	2.9e-08	0.0062	S3_PDR
			Distal colon					1.13	(1.10-1.17)	1.5e-18
			Rectal					1.09	(1.06-1.12)	3.3e-09
12q13.3	LRP1	rs4759277	Proximal colon	12	57533690	A/C	35.46	1.06	(1.03-1.09)	0.00018	0.38	S3_PDR
			Distal colon					1.07	(1.04-1.10)	4e-06
			Rectal					1.04	(1.02-1.07)	0.0026
12q24.12	SH2B3	rs597808	Proximal colon	12	111973358	G/A	51.66	1.11	(1.08-1.14)	5.2e-13	0.042	S3_PDR
			Distal colon					1.08	(1.05-1.11)	1.4e-08
			Rectal					1.06	(1.03-1.09)	2.8e-05
12q24.21	MED13L	rs7300312	Proximal colon	12	115890922	C/T	57.19	1.04	(1.02-1.07)	0.0014	0.21	S3_PDR
			Distal colon					1.07	(1.05-1.10)	3.2e-07
			Rectal					1.06	(1.03-1.09)	1.2e-05
12q24.22	NOS1	rs55990915	Proximal colon	12	117763309	A/C	13.1	1.12	(1.07-1.16)	8.3e-08	0.0182	S2_PD
			Distal colon					1.07	(1.03-1.12)	0.000749
			Rectal					1.04	(1.00-1.09)	0.0467
13q13.2	STARD13; RFC3	rs377429877	Proximal colon	13	34092164	C/T	61.17	1.06	(1.03-1.09)	5.4e-05	0.11	S3_PDR, S2_PD
			Distal colon					1.07	(1.04-1.10)	1.2e-05
			Rectal					1.04	(1.01-1.07)	0.015
13q13.3	SMAD9	rs7333607	Proximal colon	13	37462010	G/A	23.5	1.07	(1.04-1.10)	4.6e-05	0.15	S3_PDR
			Distal colon					1.09	(1.06-1.13)	1.6e-07
			Rectal					1.1	(1.07-1.14)	3.2e-09
13q22.1	KLF5	rs78341008	Proximal colon	13	73791554	C/T	7.19	1.12	(1.06-1.18)	3.4e-05	0.66	S3_PDR
			Distal colon					1.12	(1.06-1.18)	2.8e-05
			Rectal					1.12	(1.06-1.18)	2.1e-05
13q34	COL4A2	rs8000189	Proximal colon	13	111075881	T/C	64.01	1.06	(1.03-1.09)	0.00015	0.56	S3_PDR
			Distal colon					1.04	(1.01-1.07)	0.0064
			Rectal					1.06	(1.03-1.09)	1.9e-05
14q22.2	BMP4	rs35107139	Proximal colon	14	54419106	C/A	42.35	1.1	(1.07-1.13)	3.1e-11	0.6	S3_PDR
			Distal colon					1.1	(1.07-1.13)	8.6e-11
			Rectal					1.11	(1.08-1.15)	1.8e-14
14q22.2	BMP4	rs4901473	Proximal colon	14	54445157	G/A	37.8	1.04	(1.01-1.07)	0.01	0.098	S3_PDR
			Distal colon					1.07	(1.04-1.10)	4.2e-06
			Rectal					1.07	(1.04-1.10)	1.1e-06
14q23.1	DACT1	rs17094983	Proximal colon	14	59189361	G/A	87.73	1.12	(1.08-1.17)	4.4e-08	0.034	S3_PDR, S2_PD
			Distal colon					1.09	(1.05-1.14)	5.4e-05
			Rectal					1.06	(1.02-1.10)	0.0047
15q13.3	GREM1	rs12708491	Proximal colon	15	32992836	A/G	20.55	1.09	(1.06-1.12)	6e-10	0.07	S3_PDR
			Distal colon					1.05	(1.02-1.08)	0.00024
			Rectal					1.09	(1.06-1.12)	3.9e-09
15q13.3	GREM1	rs2293581	Proximal colon	15	33010736	A/G	21.16	1.16	(1.12-1.20)	3.5e-19	6.1e-05	S3_PDR
			Distal colon					1.12	(1.08-1.16)	8.1e-11
			Rectal					1.22	(1.19-1.26)	7.1e-35
15q13.3	GREM1	rs17816465	Proximal colon	15	33156386	A/G	20.55	1.07	(1.04-1.11)	1.9e-05	0.019	S2_PR
			Distal colon					1.03	(1.00-1.07)	0.081
			Rectal					1.09	(1.06-1.13)	7.6e-08
15q22.33	SMAD3	rs56324967	Proximal colon	15	67402824	C/T	67.57	1.09	(1.06-1.12)	3.1e-09	0.17	S3_PDR
			Distal colon					1.05	(1.02-1.09)	0.00046
			Rectal					1.07	(1.04-1.10)	8e-06
16q22.1	CDH1	rs9924886	Proximal colon	16	68743939	A/C	73.21	1.06	(1.03-1.09)	0.00032	0.73	S3_PDR
			Distal colon					1.06	(1.03-1.09)	0.00023
			Rectal					1.05	(1.02-1.08)	0.0031
16q23.2	MAF; DYNLRB2	rs9930005	Proximal colon	16	80043258	C/A	43.03	1.03	(1.00-1.06)	0.033	0.0056	S1_D, S3_PDR
			Distal colon					1.09	(1.06-1.12)	6.7e-09
			Rectal					1.03	(1.00-1.06)	0.049
16q24.1	LOC146513; LINC00917; FOXL1	rs12149163	Proximal colon	16	86339315	T/C	49.76	1.01	(0.98-1.04)	0.46	0.002	S2_DR
			Distal colon					1.07	(1.04-1.10)	8.2e-07
			Rectal					1.06	(1.03-1.09)	3.2e-05
16q24.1	FOXL1	rs62042090	Proximal colon	16	86703949	T/C	21.64	1.01	(0.98-1.05)	0.39	0.0061	S2_DR
			Distal colon					1.08	(1.04-1.12)	7.4e-06
			Rectal					1.06	(1.02-1.09)	0.00073
17p13.3	NXN	rs4968127	Proximal colon	17	809643	G/A	36.84	1.05	(1.02-1.08)	0.00084	0.099	S3_PDR
			Distal colon					1.09	(1.06-1.12)	4.1e-09
			Rectal					1.06	(1.03-1.09)	0.00012
17p12	LINC00675; TMEM220-AS1	rs1078643	Proximal colon	17	10707241	A/G	76.36	1.07	(1.04-1.11)	4.5e-05	0.62	S3_PDR
			Distal colon					1.09	(1.05-1.13)	1e-06
			Rectal					1.1	(1.06-1.13)	9.9e-08
17q24.3	LINC00673	rs983318	Proximal colon	17	70413253	A/G	25.26	1.1	(1.06-1.13)	2.9e-09	0.00011	S2_PD
			Distal colon					1.1	(1.06-1.13)	4.5e-09
			Rectal					1.02	(0.99-1.06)	0.16
17q25.3	RAB40B; METRLN	rs75954926	Proximal colon	17	81061048	G/A	65.68	1.03	(1.00-1.06)	0.06	3.6e-06	S2_DR
			Distal colon					1.11	(1.07-1.14)	1e-09
			Rectal					1.12	(1.08-1.15)	4.1e-12
18q21.1	SMAD7	rs11874392	Proximal colon	18	46453156	A/T	54.5	1.12	(1.09-1.15)	3.4e-17	8.1e-06	S3_PDR_HET, S3_PDR
			Distal colon					1.19	(1.16-1.23)	1.4e-36
			Rectal					1.2	(1.17-1.24)	3.6e-41
19p13.11	KLF2	rs34797592	Proximal colon	19	16417198	T/C	11.82	1.08	(1.03-1.12)	0.00045	0.33	S3_PDR
			Distal colon					1.11	(1.06-1.15)	2.8e-06
			Rectal					1.09	(1.04-1.13)	0.0001
19q13.11	RHPN2; GPATCH1	rs28840750	Proximal colon	19	33519927	T/G	94.8	1.14	(1.07-1.21)	3.1e-05	0.0027	S3_PDR
			Distal colon					1.32	(1.24-1.41)	3.9e-17
			Rectal					1.2	(1.13-1.27)	9.9e-09
19q13.2	TGFB1; B9D2	rs1963413	Proximal colon	19	41871573	A/G	61.19	1.06	(1.03-1.09)	9.5e-05	0.67	S3_PDR
			Distal colon					1.05	(1.02-1.08)	0.0015
			Rectal					1.06	(1.03-1.09)	3e-05
19q13.43	MZF1	rs73068325	Proximal colon	19	59079096	T/C	18.26	1.07	(1.03-1.11)	0.0001	0.24	S3_PDR
			Distal colon					1.05	(1.02-1.09)	0.0036
			Rectal					1.09	(1.05-1.13)	2.8e-06
20p12.3	BMP2	rs189583	Proximal colon	20	6376457	G/C	32.98	1.09	(1.06-1.12)	4.1e-09	0.62	S3_PDR
			Distal colon					1.1	(1.07-1.14)	2.2e-11
			Rectal					1.1	(1.07-1.13)	1.5e-11
20p12.3	BMP2	rs994308	Proximal colon	20	6603622	C/T	59.39	1.06	(1.04-1.09)	9.3e-06	0.3	S3_PDR
			Distal colon					1.09	(1.06-1.13)	2e-10
			Rectal					1.09	(1.06-1.12)	3.5e-10
20p12.3	BMP2	rs4813802	Proximal colon	20	6699595	G/T	35.61	1.09	(1.06-1.12)	3.1e-09	0.23	S3_PDR
			Distal colon					1.06	(1.03-1.09)	4.2e-05
			Rectal					1.07	(1.04-1.10)	1.1e-05
20p12.3	BMP2	rs28488	Proximal colon	20	6762221	T/C	63.88	1.05	(1.02-1.08)	0.001	0.22	S3_PDR
			Distal colon					1.08	(1.05-1.11)	3.1e-07
			Rectal					1.06	(1.03-1.09)	6.2e-05
20p12.3	HAO1	rs11087784	Proximal colon	20	7740976	G/A	15.23	1.12	(1.08-1.16)	2.8e-09	0.11	S3_PDR
			Distal colon					1.09	(1.05-1.13)	4.7e-06
			Rectal					1.06	(1.02-1.10)	0.0037
20q11.22	ITCH; DYNLRB1; MAP1LC3A; PIGU; TP53INP2	rs6058093	Proximal colon	20	33213196	C/A	49.42	1.04	(1.01-1.07)	0.0043	0.53	S3_PDR, S2_PR
			Distal colon					1.04	(1.01-1.07)	0.0095
			Rectal					1.05	(1.03-1.08)	0.00014
20q13.12	TOX2	rs6031311	Proximal colon	20	42666475	T/C	75.91	1.06	(1.03-1.10)	0.0001	0.83	S3_PDR
			Distal colon					1.07	(1.04-1.11)	1.6e-05
			Rectal					1.06	(1.03-1.09)	0.00031
20q13.13	PREX1	rs6066825	Proximal colon	20	47340117	A/G	64.48	1.04	(1.01-1.07)	0.0059	0.0036	S2_DR
			Distal colon					1.1	(1.07-1.13)	2.9e-10
			Rectal					1.1	(1.07-1.13)	2.3e-10
20q13.13	PTPN1	rs6063514	Proximal colon	20	49055318	C/T	60.86	1.07	(1.04-1.10)	1.1e-06	0.0084	S2_PD, S3_PDR
			Distal colon					1.08	(1.05-1.11)	5.4e-08
			Rectal					1.03	(1.00-1.06)	0.044
20q13.33	LAMA5; RPS21	rs1741640	Proximal colon	20	60932414	C/T	76.52	1.09	(1.05-1.12)	4.2e-07	0.0014	S3_PDR
			Distal colon					1.11	(1.07-1.14)	2.1e-09
			Rectal					1.17	(1.13-1.21)	4.7e-20
20q13.33	RTEL1	rs2738783	Proximal colon	20	62308612	T/G	20.29	1.09	(1.05-1.12)	2.1e-06	0.051	S2_PD, S3_PDR
			Distal colon					1.05	(1.02-1.09)	0.0036
			Rectal					1.04	(1.00-1.08)	0.026
Index SNPs of previously published variants based on Huyghe et al. Reference SNP cluster ID (rsID) based on NCBI dbSNP Build 152. Alleles are on the + strand. Chrom., chromosome; RAF, risk allele frequency; OR, odds (log-additive) ratio estimate for the risk allele; 95% CI, 95% confidence interval. All P-values reported in this table are based on a sample size-weighted fixed-effects meta-analysis…

## Sheet: Suppl. Table 8
Supplementary Table 8. Pathway enrichment analysis results. P-values were calculated from genome-wide summary statistics using the Pascal program. The gene set library used comprised the combined KEGG, REACTOME, and BIOCARTA databases. Bonferroni-significant P-values are bolded and highlighted in yellow.
Gene set	Proximal colon chi2Pvalue	Distal colon chi2Pvalue	Rectal chi2Pvalue	Colon chi2Pvalue	Left-sided colorectal chi2Pvalue
REACTOME_TGF_BETA_RECEPTOR_SIGNALING_ACTIVATES_SMADS	5.11188e-07	0.00570945	0.0467522	7.82283e-06	0.0114834
REACTOME_DOWNREGULATION_OF_TGF_BETA_RECEPTOR_SIGNALING	7.58105e-06	0.0106599	0.0294054	7.50563e-05	0.0148461
KEGG_TGF_BETA_SIGNALING_PATHWAY	1.0031e-05	0.000101249	7.31179e-06	6.01799e-06	5.32887e-06
REACTOME_SIGNALING_BY_TGF_BETA_RECEPTOR_COMPLEX	2.64342e-05	0.0530786	0.112234	0.000435873	0.0781294
KEGG_CYTOKINE_CYTOKINE_RECEPTOR_INTERACTION	2.88848e-05	0.00131569	0.0465775	0.000316914	0.00258695
REACTOME_SIGNALING_BY_BMP	5.74065e-05	0.000469926	0.000784604	2.80475e-05	0.000132395
REACTOME_GENERIC_TRANSCRIPTION_PATHWAY	5.81709e-05	0.0528841	0.00732472	0.000670119	0.00445731
KEGG_JAK_STAT_SIGNALING_PATHWAY	0.000280067	0.0492227	0.090265	0.00449604	0.0332885
BIOCARTA_ALK_PATHWAY	0.000283229	5.25643e-07	3.02652e-06	1.28474e-06	1.48773e-07
KEGG_PATHWAYS_IN_CANCER	0.000310355	4.49651e-05	0.000308086	5.2692e-05	7.02471e-06
BIOCARTA_TGFB_PATHWAY	0.000376587	0.000706595	0.00874381	0.000150371	0.000795693
REACTOME_TRANSCRIPTIONAL_ACTIVITY_OF_SMAD2_SMAD3_SMAD4_HETEROTRIMER	0.000499457	0.0362076	0.103134	0.000966205	0.0502675
KEGG_ENDOCYTOSIS	0.00108686	0.0294336	0.107811	0.00172597	0.050817
REACTOME_MEIOTIC_RECOMBINATION	0.00200906	0.21327	0.0538009	0.0174684	0.026306
REACTOME_SIGNALLING_BY_NGF	0.00206287	0.0212677	0.128633	0.00285573	0.0397571
REACTOME_DOWNREGULATION_OF_SMAD2_3_SMAD4_TRANSCRIPTIONAL_ACTIVITY	0.00228576	0.227349	0.767265	0.0172668	0.47761
REACTOME_MEIOSIS	0.00230665	0.243912	0.029363	0.015583	0.0470112
REACTOME_REMOVAL_OF_THE_FLAP_INTERMEDIATE_FROM_THE_C_STRAND	0.00249332	2.54728e-05	0.000314643	4.07782e-05	3.35061e-05
BIOCARTA_TOB1_PATHWAY	0.00256554	0.00139127	0.115286	0.000748508	0.00937027
KEGG_PANCREATIC_CANCER	0.00261539	0.00557017	0.0166325	0.00224499	0.00111795
BIOCARTA_CTCF_PATHWAY	0.00322753	0.0243599	0.0106344	0.00234982	0.0161308
REACTOME_NGF_SIGNALLING_VIA_TRKA_FROM_THE_PLASMA_MEMBRANE	0.00324117	0.0470009	0.113076	0.00860173	0.0532945
KEGG_FOCAL_ADHESION	0.00327359	0.0107012	0.00103761	0.00368209	0.00110319
KEGG_RENAL_CELL_CARCINOMA	0.00369203	0.0856185	0.144704	0.0241261	0.0412379
REACTOME_VOLTAGE_GATED_POTASSIUM_CHANNELS	0.00433557	0.0615568	0.492393	0.0158784	0.118664
KEGG_MISMATCH_REPAIR	0.0043367	0.00200632	0.00724585	0.000488292	0.00120435
REACTOME_EXTENSION_OF_TELOMERES	0.00453093	7.21959e-05	0.000124058	0.000163426	5.7035e-05
REACTOME_YAP1_AND_WWTR1_TAZ_STIMULATED_GENE_EXPRESSION	0.00487383	0.130382	0.0993185	0.00971248	0.0288902
REACTOME_SMAD2_SMAD3_SMAD4_HETEROTRIMER_REGULATES_TRANSCRIPTION	0.00493848	0.0139592	0.0418349	0.00167403	0.0155155
KEGG_REGULATION_OF_ACTIN_CYTOSKELETON	0.00525502	0.00834844	0.0298299	0.000792501	0.00787237
KEGG_FC_GAMMA_R_MEDIATED_PHAGOCYTOSIS	0.00532515	0.426437	0.064441	0.0299972	0.154532
BIOCARTA_TEL_PATHWAY	0.00550225	0.288574	0.00582466	0.0467744	0.130337
REACTOME_SIGNALING_BY_PDGF	0.00573916	0.070575	0.131405	0.10259	0.0438636
REACTOME_EXTRINSIC_PATHWAY_FOR_APOPTOSIS	0.00667681	0.0143272	0.0368117	0.00215561	0.0132675
BIOCARTA_CELLCYCLE_PATHWAY	0.00688514	0.00945486	0.00990151	0.00515479	0.00274751
REACTOME_INTEGRIN_CELL_SURFACE_INTERACTIONS	0.0070099	0.0174987	0.00129948	0.0129108	0.000504329
BIOCARTA_ACH_PATHWAY	0.00759359	0.0770299	0.00790495	0.0454585	0.0102251
KEGG_CELL_CYCLE	0.00799468	0.00965212	0.0012646	0.000289824	0.000129267
BIOCARTA_STRESS_PATHWAY	0.00859633	0.00114422	0.00414262	0.000828532	0.000521676
REACTOME_HEMOSTASIS	0.00913782	0.0289501	0.00953043	0.00261776	0.00253702
REACTOME_SIGNALING_BY_EGFR_IN_CANCER	0.0106406	0.0231187	0.118093	0.0243129	0.0295677
KEGG_MAPK_SIGNALING_PATHWAY	0.0106528	0.0406685	0.0388792	0.00562162	0.00678186
REACTOME_PROCESSIVE_SYNTHESIS_ON_THE_LAGGING_STRAND	0.0113764	2.2056e-05	0.000252551	7.44305e-05	2.82545e-05
REACTOME_G1_PHASE	0.0115004	0.0305211	0.0439819	0.0205601	0.0125973
REACTOME_A_TETRASACCHARIDE_LINKER_SEQUENCE_IS_REQUIRED_FOR_GAG_SYNTHESIS	0.011834	0.0376371	0.0265896	0.00577848	0.026558
BIOCARTA_SODD_PATHWAY	0.0119014	0.0254827	0.318991	0.0075391	0.0794711
BIOCARTA_NTHI_PATHWAY	0.0119361	0.0765304	0.274977	0.0457495	0.0324792
REACTOME_SIGNALING_BY_NODAL	0.011989	0.0632464	0.891164	0.0164748	0.343145
BIOCARTA_PML_PATHWAY	0.0123637	0.0480956	0.158949	0.068444	0.0385083
REACTOME_SIGNALLING_TO_ERKS	0.0125253	0.116161	0.0578562	0.0768273	0.0426812
BIOCARTA_MAPK_PATHWAY	0.0127108	0.150685	0.016904	0.0208084	0.0263626
REACTOME_NITRIC_OXIDE_STIMULATES_GUANYLATE_CYCLASE	0.0131042	0.503522	0.218847	0.102353	0.257873
KEGG_NATURAL_KILLER_CELL_MEDIATED_CYTOTOXICITY	0.0131989	0.153664	0.0598417	0.0888117	0.109363
BIOCARTA_ACE2_PATHWAY	0.0133695	0.165834	0.129459	0.048064	0.0884323
BIOCARTA_GCR_PATHWAY	0.0138975	0.14165	0.0600077	0.0617496	0.143651
REACTOME_P38MAPK_EVENTS	0.0140529	0.11272	0.218133	0.0300006	0.0471983
KEGG_THYROID_CANCER	0.0142282	0.309014	0.269599	0.0976815	0.247913
BIOCARTA_IL7_PATHWAY	0.0152458	0.189139	0.356529	0.0143863	0.307539
REACTOME_ETHANOL_OXIDATION	0.0154782	0.138824	0.0584961	0.0342629	0.0613124
KEGG_GAP_JUNCTION	0.0163831	0.0833278	0.210411	0.0845178	0.0982423
REACTOME_TELOMERE_MAINTENANCE	0.0164221	0.000323735	9.70969e-05	0.000385518	0.000249831
KEGG_AUTOIMMUNE_THYROID_DISEASE	0.0176072	0.0476739	0.677038	0.047304	0.525927
REACTOME_CHROMOSOME_MAINTENANCE	0.0183947	0.0218613	0.000938979	0.004869	0.00677587
BIOCARTA_G1_PATHWAY	0.0188373	0.0154898	0.00685353	0.00923339	0.00323791
REACTOME_FACTORS_INVOLVED_IN_MEGAKARYOCYTE_DEVELOPMENT_AND_PLATELET_PRODUCTION	0.0195612	0.174091	0.0362822	0.0334455	0.0312934
REACTOME_ARMS_MEDIATED_ACTIVATION	0.0201411	0.37415	0.0987944	0.363816	0.274814
BIOCARTA_CTLA4_PATHWAY	0.020508	0.0796554	0.143367	0.0193252	0.0686669
REACTOME_ENOS_ACTIVATION_AND_REGULATION	0.0205788	0.362371	0.0950263	0.184877	0.113926
REACTOME_NA_CL_DEPENDENT_NEUROTRANSMITTER_TRANSPORTERS	0.0206679	0.304958	0.012083	0.182005	0.0404101
REACTOME_TRAFFICKING_AND_PROCESSING_OF_ENDOSOMAL_TLR	0.020878	0.740987	0.37048	0.279321	0.6917
REACTOME_RESOLUTION_OF_AP_SITES_VIA_THE_MULTIPLE_NUCLEOTIDE_PATCH_REPLACEMENT_PATHWAY	0.0209005	6.93155e-05	0.00528095	0.000475943	0.000368921
KEGG_ASTHMA	0.0222019	0.18734	0.750101	0.332192	0.602234
KEGG_LEUKOCYTE_TRANSENDOTHELIAL_MIGRATION	0.0222819	0.484389	0.0372587	0.0460742	0.0413802
REACTOME_BASE_EXCISION_REPAIR	0.0223001	0.000127201	0.0093934	0.0010702	0.00063218
KEGG_COLORECTAL_CANCER	0.022573	0.108129	0.0200877	0.0403653	0.0288695
KEGG_BASE_EXCISION_REPAIR	0.0226707	0.000150014	0.0297175	0.000857329	0.00169273
KEGG_APOPTOSIS	0.0228294	0.3403	0.293691	0.0352168	0.329824
REACTOME_SIGNALING_BY_RHO_GTPASES	0.0232903	0.148814	0.25757	0.0818044	0.0680587
REACTOME_CHOLESTEROL_BIOSYNTHESIS	0.0236778	0.604734	0.0794573	0.277269	0.190287
KEGG_CHRONIC_MYELOID_LEUKEMIA	0.0247552	0.0179898	0.0322331	0.0324716	0.0150963
KEGG_CALCIUM_SIGNALING_PATHWAY	0.0256808	0.367759	0.797874	0.129226	0.607862
KEGG_ENDOMETRIAL_CANCER	0.0257625	0.251989	0.0882268	0.26755	0.0847605
BIOCARTA_TNFR1_PATHWAY	0.0268582	0.121048	0.516433	0.0279003	0.172924
KEGG_LONG_TERM_POTENTIATION	0.0268703	0.177721	0.783003	0.226416	0.579332
REACTOME_DOWNSTREAM_SIGNAL_TRANSDUCTION	0.0277542	0.0494108	0.111542	0.136236	0.0379789
REACTOME_LAGGING_STRAND_SYNTHESIS	0.0288476	7.7102e-05	0.00063394	0.000439247	0.000108948
BIOCARTA_CDC42RAC_PATHWAY	0.0290833	0.136269	0.13973	0.0162243	0.0822109
REACTOME_POL_SWITCHING	0.0291229	0.000592822	0.00427089	0.00175153	0.00160134
REACTOME_PROLONGED_ERK_ACTIVATION_EVENTS	0.0298034	0.401782	0.119521	0.30071	0.262855
KEGG_MELANOMA	0.0313276	0.0145692	0.0599058	0.0544608	0.0115512
REACTOME_SIGNALLING_TO_RAS	0.0318478	0.0906464	0.0427004	0.1299	0.0198838
KEGG_ALZHEIMERS_DISEASE	0.0320116	0.151578	0.525564	0.051531	0.32979
BIOCARTA_ETS_PATHWAY	0.0324436	0.411028	0.191189	0.0905339	0.242221
BIOCARTA_HIVNEF_PATHWAY	0.0342059	0.316438	0.565087	0.0434717	0.285155
REACTOME_RIG_I_MDA5_MEDIATED_INDUCTION_OF_IFN_ALPHA_BETA_PATHWAYS	0.0348308	0.742396	0.906375	0.399116	0.93604
KEGG_HOMOLOGOUS_RECOMBINATION	0.0369877	0.000483904	0.0691311	0.00149257	0.00704146
REACTOME_SIGNALLING_TO_P38_VIA_RIT_AND_RIN	0.0382664	0.169585	0.071732	0.282601	0.179644
KEGG_VEGF_SIGNALING_PATHWAY	0.038698	0.0707837	0.0992946	0.0779208	0.0148323
BIOCARTA_CSK_PATHWAY	0.0396657	0.0207105	0.287635	0.00366207	0.0696335
BIOCARTA_MET_PATHWAY	0.0399847	0.145729	0.0325769	0.122045	0.0193061
KEGG_INTESTINAL_IMMUNE_NETWORK_FOR_IGA_PRODUCTION	0.0411759	0.000606652	0.0318001	0.00676407	0.00331275
REACTOME_CRMPS_IN_SEMA3A_SIGNALING	0.0417139	0.285793	0.708627	0.0866085	0.409531
BIOCARTA_IL2RB_PATHWAY	0.0429101	0.068816	0.124964	0.0377072	0.237744
REACTOME_AMINO_ACID_TRANSPORT_ACROSS_THE_PLASMA_MEMBRANE	0.0441817	0.258215	0.0428487	0.196386	0.0846414
KEGG_REGULATION_OF_AUTOPHAGY	0.0444098	0.106374	0.782093	0.0255272	0.336899
REACTOME_GAMMA_CARBOXYLATION_TRANSPORT_AND_AMINO_TERMINAL_CLEAVAGE_OF_PROTEINS	0.0463914	0.27351	0.259581	0.102824	0.165337
BIOCARTA_RAC1_PATHWAY	0.0478625	0.059793	0.208581	0.0361297	0.0390821
REACTOME_DNA_STRAND_ELONGATION	0.0488307	0.00027664	0.000177639	0.00136065	4.62252e-05
REACTOME_SIGNALING_BY_SCF_KIT	0.0489128	0.212633	0.105238	0.283944	0.138193
REACTOME_REPAIR_SYNTHESIS_FOR_GAP_FILLING_BY_DNA_POL_IN_TC_NER	0.0500343	0.00560474	0.0176748	0.00921481	0.00815013
REACTOME_P130CAS_LINKAGE_TO_MAPK_SIGNALING_FOR_INTEGRINS	0.0502937	0.68631	0.210001	0.213893	0.333012
REACTOME_INTEGRIN_ALPHAIIB_BETA3_SIGNALING	0.0503465	0.31791	0.385371	0.211783	0.332446
REACTOME_REGULATION_OF_AMPK_ACTIVITY_VIA_LKB1	0.0509327	0.599977	0.588042	0.0880787	0.607879
BIOCARTA_FAS_PATHWAY	0.0514445	0.51795	0.85369	0.128249	0.794013
BIOCARTA_TALL1_PATHWAY	0.0518429	0.18245	0.431832	0.181539	0.120712
KEGG_ARACHIDONIC_ACID_METABOLISM	0.0521075	0.0297469	0.67612	0.028152	0.0589584
KEGG_BLADDER_CANCER	0.0528455	0.014836	0.00321123	0.143311	0.00327892
REACTOME_AMINE_COMPOUND_SLC_TRANSPORTERS	0.0531602	0.507084	0.0312968	0.351125	0.0761604
REACTOME_TETRAHYDROBIOPTERIN_BH4_SYNTHESIS_RECYCLING_SALVAGE_AND_REGULATION	0.0538571	0.184481	0.164576	0.12564	0.0758778
REACTOME_PHOSPHORYLATION_OF_CD3_AND_TCR_ZETA_CHAINS	0.054757	0.313064	0.939227	0.0696427	0.453074
KEGG_AXON_GUIDANCE	0.0553313	0.0392888	0.587184	0.0323165	0.171851
BIOCARTA_DEATH_PATHWAY	0.0557516	0.562793	0.348683	0.130856	0.268681
BIOCARTA_RELA_PATHWAY	0.0566965	0.0285727	0.184658	0.0383785	0.0360799
REACTOME_ABCA_TRANSPORTERS_IN_LIPID_HOMEOSTASIS	0.0579312	0.00677943	0.378542	0.00799816	0.0768296
BIOCARTA_INTEGRIN_PATHWAY	0.0590732	0.55309	0.101753	0.429132	0.208961
REACTOME_REGULATION_OF_KIT_SIGNALING	0.0596081	0.233773	0.255044	0.117081	0.262562
BIOCARTA_ATRBRCA_PATHWAY	0.059624	0.54552	0.495395	0.271403	0.543153
KEGG_SMALL_CELL_LUNG_CANCER	0.0605106	0.0761851	0.00987494	0.0258329	0.00894978
KEGG_STEROID_BIOSYNTHESIS	0.0613944	0.467528	0.229841	0.166416	0.127853
BIOCARTA_P27_PATHWAY	0.0632154	0.199753	0.0832958	0.0956697	0.240488
REACTOME_CELL_CYCLE	0.0640733	0.0644273	0.000788838	0.00744482	0.000780761
REACTOME_APOPTOSIS_INDUCED_DNA_FRAGMENTATION	0.064276	0.616899	0.302102	0.414527	0.512119
KEGG_P53_SIGNALING_PATHWAY	0.0648709	0.0149632	0.0607703	0.0187663	0.0180934
BIOCARTA_IL4_PATHWAY	0.065646	0.00154516	0.292697	0.0177103	0.0491909
KEGG_ABC_TRANSPORTERS	0.0657862	0.0231749	0.367922	0.0515091	0.0442495
REACTOME_CELL_CELL_JUNCTION_ORGANIZATION	0.0668896	0.373907	0.257858	0.136478	0.0807189
REACTOME_ELONGATION_ARREST_AND_RECOVERY	0.0679422	0.748768	0.918368	0.425943	0.84492
REACTOME_FANCONI_ANEMIA_PATHWAY	0.0694219	0.514968	0.157653	0.163392	0.430918
REACTOME_POTASSIUM_CHANNELS	0.0696289	0.0518387	0.844972	0.083147	0.298733
REACTOME_IL_7_SIGNALING	0.0701434	0.102297	0.921406	0.0120068	0.350333
REACTOME_MITOCHONDRIAL_TRNA_AMINOACYLATION	0.070792	0.397868	0.326444	0.10836	0.2596
REACTOME_TRAF6_MEDIATED_IRF7_ACTIVATION	0.0718372	0.75606	0.639045	0.42981	0.761504
KEGG_CELL_ADHESION_MOLECULES_CAMS	0.0734509	0.043384	0.030107	0.0472099	0.022517
KEGG_UBIQUITIN_MEDIATED_PROTEOLYSIS	0.074547	0.0742577	0.161462	0.0609224	0.141458
KEGG_TIGHT_JUNCTION	0.0746365	0.504091	0.253708	0.254508	0.129537
BIOCARTA_CERAMIDE_PATHWAY	0.0746758	0.0158141	0.0904149	0.0178229	0.0351926
KEGG_PARKINSONS_DISEASE	0.0747288	0.651931	0.490243	0.245133	0.641656
BIOCARTA_CELL2CELL_PATHWAY	0.0756509	0.748202	0.125321	0.32391	0.219582
REACTOME_ENERGY_DEPENDENT_REGULATION_OF_MTOR_BY_LKB1_AMPK	0.0760063	0.446013	0.713599	0.0913709	0.617566
REACTOME_RETROGRADE_NEUROTROPHIN_SIGNALLING	0.0764812	0.67093	0.253442	0.182585	0.334932
BIOCARTA_SALMONELLA_PATHWAY	0.0767435	0.0198493	0.122453	0.00852576	0.00901175
BIOCARTA_MITOCHONDRIA_PATHWAY	0.0772126	0.426654	0.73521	0.173819	0.819292
REACTOME_SIGNALING_BY_CONSTITUTIVELY_ACTIVE_EGFR	0.0773613	0.233527	0.0385404	0.228565	0.0767687
REACTOME_ALPHA_LINOLENIC_ACID_ALA_METABOLISM	0.077908	0.0781845	0.164092	0.0499749	0.115606
KEGG_GLYOXYLATE_AND_DICARBOXYLATE_METABOLISM	0.077937	0.438499	0.481064	0.281558	0.479163
REACTOME_AMINO_ACID_AND_OLIGOPEPTIDE_SLC_TRANSPORTERS	0.0787935	0.0485703	0.0531201	0.0312936	0.0323886
REACTOME_GAP_JUNCTION_DEGRADATION	0.0792927	0.290603	0.174943	0.0838675	0.345933
KEGG_LONG_TERM_DEPRESSION	0.0797468	0.229902	0.745967	0.0983078	0.645153
REACTOME_OLFACTORY_SIGNALING_PATHWAY	0.079819	0.719304	0.326368	0.353291	0.3745
KEGG_FC_EPSILON_RI_SIGNALING_PATHWAY	0.0801627	0.283935	0.0866438	0.432031	0.179255
REACTOME_NUCLEAR_EVENTS_KINASE_AND_TRANSCRIPTION_FACTOR_ACTIVATION	0.0808462	0.0707079	0.144682	0.0321571	0.0507735
REACTOME_SEMA3A_PAK_DEPENDENT_AXON_REPULSION	0.0817569	0.0777222	0.228579	0.0262951	0.0849717
BIOCARTA_AMI_PATHWAY	0.0822921	0.556195	0.0929216	0.246708	0.144202
REACTOME_GAB1_SIGNALOSOME	0.0831422	0.374129	0.185296	0.382214	0.171821
KEGG_PATHOGENIC_ESCHERICHIA_COLI_INFECTION	0.0840794	0.198724	0.0918994	0.0480014	0.099454
REACTOME_PEPTIDE_CHAIN_ELONGATION	0.0842378	0.00776565	0.147591	0.0115001	0.0168882
REACTOME_PHASE1_FUNCTIONALIZATION_OF_COMPOUNDS	0.0857351	0.552868	0.28772	0.299054	0.216984
REACTOME_LATENT_INFECTION_OF_HOMO_SAPIENS_WITH_MYCOBACTERIUM_TUBERCULOSIS	0.0860195	0.0392048	0.659868	0.0974166	0.175919
KEGG_ALPHA_LINOLENIC_ACID_METABOLISM	0.0866861	0.0110541	0.0583199	0.0148413	0.0117651
REACTOME_NEPHRIN_INTERACTIONS	0.086788	0.477748	0.0215006	0.052417	0.0508812
KEGG_B_CELL_RECEPTOR_SIGNALING_PATHWAY	0.0877199	0.284791	0.174582	0.37019	0.264171
KEGG_GLYCOSPHINGOLIPID_BIOSYNTHESIS_LACTO_AND_NEOLACTO_SERIES	0.0879556	0.272518	0.796016	0.0835881	0.452395
KEGG_LINOLEIC_ACID_METABOLISM	0.0880693	0.250947	0.414729	0.175896	0.280773
KEGG_NEUROTROPHIN_SIGNALING_PATHWAY	0.0887429	0.616154	0.0144949	0.307659	0.0618713
KEGG_HISTIDINE_METABOLISM	0.0906695	0.307955	0.495655	0.0650054	0.725233
KEGG_OOCYTE_MEIOSIS	0.0911543	0.0962089	0.209807	0.0434523	0.10858
REACTOME_SIGNALING_BY_ERBB2	0.0920938	0.0799613	0.0711838	0.191999	0.0377539
BIOCARTA_TCRA_PATHWAY	0.0937342	0.0256409	0.401866	0.013009	0.0472895
KEGG_OLFACTORY_TRANSDUCTION	0.0938721	0.659837	0.292898	0.370055	0.375818
REACTOME_IMMUNOREGULATORY_INTERACTIONS_BETWEEN_A_LYMPHOID_AND_A_NON_LYMPHOID_CELL	0.0972618	0.0528949	0.294834	0.0873526	0.0567344
REACTOME_TIGHT_JUNCTION_INTERACTIONS	0.0979513	0.296936	0.177568	0.318012	0.0839641
REACTOME_COSTIMULATION_BY_THE_CD28_FAMILY	0.0996286	0.215449	0.446507	0.0544786	0.176658
REACTOME_ADENYLATE_CYCLASE_INHIBITORY_PATHWAY	0.101912	0.096307	0.494061	0.120899	0.0883339
BIOCARTA_KERATINOCYTE_PATHWAY	0.103816	0.0975351	0.20736	0.102361	0.123962
KEGG_DNA_REPLICATION	0.105302	0.00038983	0.00184377	0.00163368	0.000398496
REACTOME_CS_DS_DEGRADATION	0.105438	0.0928391	0.0632531	0.0341496	0.0280284
REACTOME_G_ALPHA_S_SIGNALLING_EVENTS	0.1055	0.0722769	0.269022	0.0601574	0.29899
REACTOME_SEMA3A_PLEXIN_REPULSION_SIGNALING_BY_INHIBITING_INTEGRIN_ADHESION	0.106228	0.124313	0.227213	0.0617333	0.152774
REACTOME_FORMATION_OF_RNA_POL_II_ELONGATION_COMPLEX_	0.106488	0.828826	0.985696	0.583087	0.917519
REACTOME_INNATE_IMMUNE_SYSTEM	0.11233	0.711814	0.25101	0.466125	0.566566
REACTOME_INTRINSIC_PATHWAY_FOR_APOPTOSIS	0.114206	0.790265	0.721779	0.356683	0.952818
REACTOME_PPARA_ACTIVATES_GENE_EXPRESSION	0.116219	0.566707	0.059698	0.201979	0.164397
REACTOME_SYNTHESIS_OF_PIPS_AT_THE_EARLY_ENDOSOME_MEMBRANE	0.116255	0.640496	0.909439	0.302916	0.770005
REACTOME_HEPARAN_SULFATE_HEPARIN_HS_GAG_METABOLISM	0.116269	0.197131	0.136748	0.144201	0.279434
KEGG_ALDOSTERONE_REGULATED_SODIUM_REABSORPTION	0.116651	0.208238	0.400067	0.13364	0.47263
REACTOME_ADENYLATE_CYCLASE_ACTIVATING_PATHWAY	0.116805	0.0341794	0.288472	0.0799646	0.0286371
BIOCARTA_MCM_PATHWAY	0.116912	0.350334	0.201245	0.0925006	0.226774
REACTOME_SHC1_EVENTS_IN_EGFR_SIGNALING	0.117319	0.119202	0.389644	0.567653	0.233803
REACTOME_TOLL_RECEPTOR_CASCADES	0.118075	0.268373	0.154598	0.250059	0.173617
REACTOME_DEVELOPMENTAL_BIOLOGY	0.118508	0.13282	0.0197444	0.112032	0.00756692
REACTOME_GAP_JUNCTION_TRAFFICKING	0.120595	0.624164	0.306833	0.274658	0.552638
BIOCARTA_INFLAM_PATHWAY	0.120863	0.0118315	0.0567816	0.00594758	0.0248749
BIOCARTA_EGF_PATHWAY	0.12253	0.271806	0.222544	0.251491	0.112117
REACTOME_SIGNALING_BY_FGFR	0.124098	0.220964	0.364874	0.323745	0.260811
REACTOME_SYNTHESIS_OF_BILE_ACIDS_AND_BILE_SALTS_VIA_7ALPHA_HYDROXYCHOLESTEROL	0.124399	0.392997	0.0819024	0.195731	0.18941
BIOCARTA_ERYTH_PATHWAY	0.124645	0.00349641	0.180635	0.0242985	0.0200689
REACTOME_PLATELET_HOMEOSTASIS	0.125248	0.154392	0.351257	0.0212135	0.252173
REACTOME_SIGNALING_BY_ERBB4	0.126178	0.238576	0.622159	0.451009	0.369228
REACTOME_RAF_MAP_KINASE_CASCADE	0.126452	0.148838	0.174297	0.530732	0.18174
BIOCARTA_PARKIN_PATHWAY	0.126743	0.510568	0.874093	0.449174	0.873298
REACTOME_MYOGENESIS	0.128033	0.0855864	0.0557162	0.0803993	0.0376415
KEGG_DORSO_VENTRAL_AXIS_FORMATION	0.128997	0.43359	0.71338	0.343716	0.749241
KEGG_PRIMARY_BILE_ACID_BIOSYNTHESIS	0.129363	0.204917	0.189693	0.136171	0.241525
BIOCARTA_PDGF_PATHWAY	0.129549	0.321822	0.148712	0.208536	0.124158
KEGG_NICOTINATE_AND_NICOTINAMIDE_METABOLISM	0.130064	0.880358	0.876673	0.189352	0.819924
REACTOME_CELL_CELL_COMMUNICATION	0.131063	0.347154	0.00940788	0.1559	0.00750329
REACTOME_SYNTHESIS_OF_PIPS_AT_THE_LATE_ENDOSOME_MEMBRANE	0.131151	0.871329	0.872971	0.461718	0.887263
REACTOME_RNA_POL_II_PRE_TRANSCRIPTION_EVENTS	0.133707	0.652365	0.924113	0.445223	0.940529
REACTOME_NCAM_SIGNALING_FOR_NEURITE_OUT_GROWTH	0.13423	0.307161	0.469106	0.361811	0.141937
REACTOME_3_UTR_MEDIATED_TRANSLATIONAL_REGULATION	0.1346	0.00102867	0.0842367	0.00247695	0.00662649
BIOCARTA_AKAP95_PATHWAY	0.135088	0.34516	0.675811	0.105786	0.436185
KEGG_BASAL_CELL_CARCINOMA	0.137731	0.00593473	0.0182531	0.0208265	0.00208912
REACTOME_FORMATION_OF_THE_TERNARY_COMPLEX_AND_SUBSEQUENTLY_THE_43S_COMPLEX	0.138089	0.000634306	0.0101489	0.0039717	0.00482383
KEGG_EPITHELIAL_CELL_SIGNALING_IN_HELICOBACTER_PYLORI_INFECTION	0.138163	0.0391437	0.309623	0.0685597	0.0587707
KEGG_HUNTINGTONS_DISEASE	0.140365	0.450137	0.203779	0.370889	0.290982
REACTOME_CHONDROITIN_SULFATE_DERMATAN_SULFATE_METABOLISM	0.142218	0.039231	0.263407	0.0174392	0.0923102
REACTOME_ACTIVATED_AMPK_STIMULATES_FATTY_ACID_OXIDATION_IN_MUSCLE	0.143379	0.787236	0.203062	0.200743	0.479096
BIOCARTA_ACTINY_PATHWAY	0.144454	0.0727911	0.0763052	0.0381918	0.0176281
BIOCARTA_PAR1_PATHWAY	0.144828	0.258473	0.404952	0.018061	0.385859
BIOCARTA_VDR_PATHWAY	0.145184	0.538408	0.26283	0.41455	0.300919
REACTOME_AXON_GUIDANCE	0.147652	0.377543	0.0598419	0.28581	0.039506
BIOCARTA_IGF1_PATHWAY	0.14836	0.215016	0.101525	0.345261	0.140826
KEGG_MTOR_SIGNALING_PATHWAY	0.148946	0.639099	0.687215	0.271937	0.868774
REACTOME_APOPTOSIS	0.149791	0.675129	0.349951	0.346961	0.641939
KEGG_RETINOL_METABOLISM	0.150064	0.938029	0.571311	0.845644	0.888446
REACTOME_HORMONE_SENSITIVE_LIPASE_HSL_MEDIATED_TRIACYLGLYCEROL_HYDROLYSIS	0.151418	0.341304	0.803733	0.108579	0.732784
BIOCARTA_P38MAPK_PATHWAY	0.151985	0.0348404	0.128746	0.0126243	0.0427119
BIOCARTA_STEM_PATHWAY	0.152592	0.108242	0.44649	0.189219	0.213668
BIOCARTA_41BB_PATHWAY	0.152692	0.188516	0.153565	0.169723	0.183288
REACTOME_BMAL1_CLOCK_NPAS2_ACTIVATES_CIRCADIAN_EXPRESSION	0.153383	0.284542	0.106661	0.266818	0.0569014
REACTOME_PKB_MEDIATED_EVENTS	0.153409	0.669152	0.913481	0.217474	0.847467
REACTOME_MEIOTIC_SYNAPSIS	0.154017	0.412758	0.0538248	0.124683	0.196182
REACTOME_GRB2_EVENTS_IN_ERBB2_SIGNALING	0.155188	0.0505405	0.0684261	0.25499	0.0206498
REACTOME_SYNTHESIS_OF_BILE_ACIDS_AND_BILE_SALTS_VIA_24_HYDROXYCHOLESTEROL	0.155355	0.0879997	0.316294	0.138199	0.27064
BIOCARTA_RAS_PATHWAY	0.156876	0.108633	0.247129	0.106187	0.0457033
BIOCARTA_SRCRPTP_PATHWAY	0.157269	0.486817	0.861056	0.316497	0.694288
BIOCARTA_D4GDI_PATHWAY	0.157559	0.513648	0.871916	0.180835	0.746882
BIOCARTA_CBL_PATHWAY	0.157742	0.274464	0.805668	0.477577	0.63485
REACTOME_ACTIVATION_OF_ATR_IN_RESPONSE_TO_REPLICATION_STRESS	0.158417	0.811269	0.506896	0.270055	0.59775
KEGG_SYSTEMIC_LUPUS_ERYTHEMATOSUS	0.160666	0.579846	0.169881	0.455139	0.210358
BIOCARTA_ASBCELL_PATHWAY	0.160724	0.0493729	0.833474	0.146494	0.582337
KEGG_T_CELL_RECEPTOR_SIGNALING_PATHWAY	0.161781	0.456463	0.0527851	0.323238	0.151385
KEGG_CARDIAC_MUSCLE_CONTRACTION	0.162022	0.67203	0.418247	0.209624	0.57125
KEGG_PURINE_METABOLISM	0.162408	0.0392074	0.377824	0.0329185	0.112195
BIOCARTA_AKAPCENTROSOME_PATHWAY	0.163307	0.273499	0.739438	0.213788	0.40535
REACTOME_IL_2_SIGNALING	0.16374	0.324644	0.41803	0.516761	0.525472
KEGG_GNRH_SIGNALING_PATHWAY	0.165203	0.103392	0.192768	0.242677	0.0597947
BIOCARTA_PTDINS_PATHWAY	0.166575	0.812159	0.606234	0.280002	0.861351
REACTOME_CELL_CYCLE_MITOTIC	0.167054	0.0291933	0.00238668	0.0132064	0.000676379
BIOCARTA_CARM_ER_PATHWAY	0.167232	0.857392	0.179762	0.475446	0.359842
KEGG_ADHERENS_JUNCTION	0.167691	0.04265	0.0346094	0.0856874	0.0130938
KEGG_VASCULAR_SMOOTH_MUSCLE_CONTRACTION	0.167746	0.355874	0.56599	0.285551	0.664919
KEGG_RIG_I_LIKE_RECEPTOR_SIGNALING_PATHWAY	0.169042	0.586169	0.644632	0.237009	0.524346
REACTOME_SHC1_EVENTS_IN_ERBB4_SIGNALING	0.171193	0.161239	0.21989	0.438915	0.120759
KEGG_ASCORBATE_AND_ALDARATE_METABOLISM	0.171558	0.5152	0.277503	0.220736	0.490211
REACTOME_INFLUENZA_LIFE_CYCLE	0.17187	0.00705322	0.249573	0.0359376	0.0512183
KEGG_PRIMARY_IMMUNODEFICIENCY	0.173867	0.0193604	0.371558	0.0272553	0.0644244
REACTOME_PI3K_EVENTS_IN_ERBB2_SIGNALING	0.175535	0.179867	0.0330808	0.271345	0.0200367
KEGG_RIBOSOME	0.176079	0.00763044	0.109186	0.017983	0.0110354
REACTOME_OXYGEN_DEPENDENT_PROLINE_HYDROXYLATION_OF_HYPOXIA_INDUCIBLE_FACTOR_ALPHA	0.176348	0.321181	0.952443	0.287774	0.65217
REACTOME_PLATELET_AGGREGATION_PLUG_FORMATION	0.177428	0.371043	0.358061	0.381721	0.263373
REACTOME_MAPK_TARGETS_NUCLEAR_EVENTS_MEDIATED_BY_MAP_KINASES	0.178145	0.219759	0.0125448	0.116518	0.0497759
KEGG_NOTCH_SIGNALING_PATHWAY	0.179405	0.436238	0.819097	0.322639	0.441985
REACTOME_GLUTAMATE_NEUROTRANSMITTER_RELEASE_CYCLE	0.179578	0.672466	0.96323	0.411884	0.746879
KEGG_HYPERTROPHIC_CARDIOMYOPATHY_HCM	0.179928	0.106055	0.617633	0.0662552	0.213013
KEGG_AMYOTROPHIC_LATERAL_SCLEROSIS_ALS	0.180908	0.0597683	0.456983	0.098229	0.169476
REACTOME_NFKB_ACTIVATION_THROUGH_FADD_RIP1_PATHWAY_MEDIATED_BY_CASPASE_8_AND10	0.182819	0.579116	0.951179	0.374657	0.850799
KEGG_STEROID_HORMONE_BIOSYNTHESIS	0.182929	0.608784	0.447996	0.322704	0.542735
BIOCARTA_INTRINSIC_PATHWAY	0.184133	0.666148	0.17009	0.353902	0.242702
REACTOME_NRAGE_SIGNALS_DEATH_THROUGH_JNK	0.184336	0.522695	0.367082	0.357603	0.489214
REACTOME_SIGNALING_BY_FGFR_IN_DISEASE	0.184786	0.191481	0.32681	0.312324	0.251958
KEGG_NON_SMALL_CELL_LUNG_CANCER	0.185258	0.264347	0.211572	0.522606	0.116924
REACTOME_G2_M_CHECKPOINTS	0.18655	0.841632	0.528637	0.294774	0.594102
REACTOME_ADHERENS_JUNCTIONS_INTERACTIONS	0.186744	0.54381	0.424657	0.138962	0.316917
BIOCARTA_CASPASE_PATHWAY	0.186868	0.434217	0.703973	0.320158	0.546946
REACTOME_INFLUENZA_VIRAL_RNA_TRANSCRIPTION_AND_REPLICATION	0.188515	0.0166718	0.230949	0.0225356	0.0467803
KEGG_ARGININE_AND_PROLINE_METABOLISM	0.188902	0.252304	0.866864	0.276121	0.579679
KEGG_RENIN_ANGIOTENSIN_SYSTEM	0.189422	0.404008	0.6061	0.421822	0.470273
BIOCARTA_IL22BP_PATHWAY	0.190453	0.0580067	0.173723	0.137331	0.0768286
BIOCARTA_CHEMICAL_PATHWAY	0.19127	0.710809	0.296632	0.338643	0.589703
REACTOME_SEMAPHORIN_INTERACTIONS	0.191902	0.244915	0.105224	0.0989372	0.114741
REACTOME_PD1_SIGNALING	0.193993	0.21349	0.123006	0.258192	0.232646
REACTOME_SPRY_REGULATION_OF_FGF_SIGNALING	0.194344	0.398516	0.853691	0.398841	0.906928
BIOCARTA_SPRY_PATHWAY	0.194681	0.130038	0.52661	0.701483	0.386956
BIOCARTA_AKAP13_PATHWAY	0.195275	0.0229749	0.0694273	0.00743625	0.0555731
KEGG_GLIOMA	0.195823	0.0710647	0.0497087	0.424696	0.0464742
KEGG_PROSTATE_CANCER	0.198787	0.0689439	0.0112051	0.270621	0.0126683
BIOCARTA_IL1R_PATHWAY	0.203008	0.0445506	0.119277	0.0465795	0.02873
KEGG_DRUG_METABOLISM_OTHER_ENZYMES	0.20344	0.875296	0.803227	0.489521	0.877339
BIOCARTA_TRKA_PATHWAY	0.204968	0.752011	0.195921	0.511622	0.445934
BIOCARTA_CD40_PATHWAY	0.206366	0.315967	0.280517	0.364746	0.149952
REACTOME_PI3K_EVENTS_IN_ERBB4_SIGNALING	0.207781	0.363341	0.245866	0.297603	0.169143
REACTOME_MYD88_MAL_CASCADE_INITIATED_ON_PLASMA_MEMBRANE	0.207788	0.0533209	0.0671182	0.110214	0.0299502
BIOCARTA_VEGF_PATHWAY	0.207912	0.276221	0.0902435	0.227448	0.115502
KEGG_INSULIN_SIGNALING_PATHWAY	0.209281	0.338171	0.24741	0.421518	0.343896
REACTOME_SYNTHESIS_OF_BILE_ACIDS_AND_BILE_SALTS	0.210151	0.301077	0.199294	0.214636	0.30966
BIOCARTA_MPR_PATHWAY	0.210379	0.0626503	0.145308	0.0197107	0.111982
REACTOME_SYNTHESIS_SECRETION_AND_INACTIVATION_OF_GIP	0.21082	0.476	0.223444	0.253735	0.437884
REACTOME_INSULIN_RECEPTOR_SIGNALLING_CASCADE	0.210893	0.563105	0.490284	0.418522	0.484863
REACTOME_MITOTIC_G1_G1_S_PHASES	0.210932	0.460753	0.195512	0.284802	0.166571
REACTOME_NUCLEAR_RECEPTOR_TRANSCRIPTION_PATHWAY	0.211066	0.0573274	0.0320669	0.151489	0.0112335
REACTOME_NEGATIVE_REGULATORS_OF_RIG_I_MDA5_SIGNALING	0.211137	0.702907	0.729192	0.537435	0.890616
BIOCARTA_PYK2_PATHWAY	0.212627	0.406704	0.235046	0.829185	0.201845
REACTOME_GRB2_SOS_PROVIDES_LINKAGE_TO_MAPK_SIGNALING_FOR_INTERGRINS_	0.213409	0.585147	0.389089	0.329832	0.333115
REACTOME_RECEPTOR_LIGAND_BINDING_INITIATES_THE_SECOND_PROTEOLYTIC_CLEAVAGE_OF_NOTCH_RECEPTOR	0.213605	0.204334	0.900552	0.0735092	0.534191
BIOCARTA_ERK_PATHWAY	0.213733	0.375086	0.384028	0.685482	0.624202
REACTOME_DOWNSTREAM_SIGNALING_OF_ACTIVATED_FGFR	0.215306	0.167123	0.238062	0.371174	0.148199
REACTOME_DNA_REPAIR	0.217144	0.0567393	0.241865	0.0850324	0.0986493
REACTOME_NOREPINEPHRINE_NEUROTRANSMITTER_RELEASE_CYCLE	0.218408	0.762612	0.676032	0.777661	0.593839
REACTOME_TRANSLOCATION_OF_ZAP_70_TO_IMMUNOLOGICAL_SYNAPSE	0.218466	0.0218405	0.252622	0.0481682	0.0373672
REACTOME_PRE_NOTCH_PROCESSING_IN_GOLGI	0.219501	0.675518	0.813135	0.205332	0.550461
REACTOME_E2F_MEDIATED_REGULATION_OF_DNA_REPLICATION	0.222443	0.749249	0.643144	0.286937	0.490311
BIOCARTA_ARAP_PATHWAY	0.222547	0.0727254	0.679503	0.112961	0.38136
KEGG_ALLOGRAFT_REJECTION	0.223126	0.247973	0.831019	0.410655	0.886903
REACTOME_SPHINGOLIPID_DE_NOVO_BIOSYNTHESIS	0.223396	0.448359	0.13752	0.445009	0.290827
BIOCARTA_FIBRINOLYSIS_PATHWAY	0.223605	0.260918	0.0730042	0.273548	0.0735822
REACTOME_DAG_AND_IP3_SIGNALING	0.224072	0.114333	0.384849	0.116041	0.289297
REACTOME_SOS_MEDIATED_SIGNALLING	0.224879	0.233632	0.405194	0.778561	0.361314
REACTOME_TRANSPORT_OF_ORGANIC_ANIONS	0.22539	0.030582	0.0832807	0.0335138	0.0281296
BIOCARTA_BLYMPHOCYTE_PATHWAY	0.227265	0.474823	0.282865	0.4999	0.340701
KEGG_PENTOSE_PHOSPHATE_PATHWAY	0.227437	0.661332	0.746858	0.586269	0.545904
REACTOME_ABC_FAMILY_PROTEINS_MEDIATED_TRANSPORT	0.228001	0.00949688	0.70585	0.0492116	0.112799
REACTOME_INCRETIN_SYNTHESIS_SECRETION_AND_INACTIVATION	0.228032	0.0419431	0.357909	0.0705445	0.201141
REACTOME_SHC_MEDIATED_SIGNALLING	0.228302	0.144683	0.126735	0.589962	0.110398
KEGG_TRYPTOPHAN_METABOLISM	0.228867	0.337684	0.764652	0.212163	0.640667
REACTOME_HS_GAG_DEGRADATION	0.229092	0.0830401	0.462941	0.0609479	0.216415
BIOCARTA_INSULIN_PATHWAY	0.231037	0.427872	0.117254	0.432648	0.21023
REACTOME_PTM_GAMMA_CARBOXYLATION_HYPUSINE_FORMATION_AND_ARYLSULFATASE_ACTIVATION	0.231761	0.524395	0.0577141	0.307497	0.273293
BIOCARTA_NFKB_PATHWAY	0.232882	0.024307	0.259528	0.0483013	0.0179973
KEGG_TYROSINE_METABOLISM	0.234579	0.567184	0.502653	0.314363	0.600841
REACTOME_TRIF_MEDIATED_TLR3_SIGNALING	0.23551	0.258536	0.229574	0.360542	0.273089
BIOCARTA_DC_PATHWAY	0.235574	0.323054	0.637744	0.400983	0.802287
REACTOME_CTNNB1_PHOSPHORYLATION_CASCADE	0.236293	0.252168	0.50102	0.203477	0.141962
BIOCARTA_HER2_PATHWAY	0.239091	0.126388	0.171323	0.283413	0.134455
BIOCARTA_TCYTOTOXIC_PATHWAY	0.23911	0.383092	0.481281	0.149131	0.440543
REACTOME_RIP_MEDIATED_NFKB_ACTIVATION_VIA_DAI	0.240077	0.745294	0.949802	0.466958	0.863034
REACTOME_REGULATION_OF_RHEB_GTPASE_ACTIVITY_BY_AMPK	0.240848	0.559026	0.703995	0.249115	0.577509
REACTOME_TRANSCRIPTION_COUPLED_NER_TC_NER	0.241271	0.0420687	0.367919	0.0933135	0.0742245
BIOCARTA_EIF2_PATHWAY	0.241745	0.299473	0.142737	0.159408	0.266508
REACTOME_EGFR_DOWNREGULATION	0.242002	0.0678842	0.782583	0.0914795	0.225668
BIOCARTA_RARRXR_PATHWAY	0.24424	0.698045	0.646101	0.677863	0.757315
KEGG_DRUG_METABOLISM_CYTOCHROME_P450	0.244637	0.855562	0.745497	0.548656	0.855046
KEGG_ADIPOCYTOKINE_SIGNALING_PATHWAY	0.244764	0.180166	0.0613567	0.107716	0.0528236
REACTOME_PI_METABOLISM	0.245694	0.889597	0.735564	0.326185	0.778646
REACTOME_ACTIVATION_OF_THE_MRNA_UPON_BINDING_OF_THE_CAP_BINDING_COMPLEX_AND_EIFS_AND_SUBSEQUENT_BINDING_TO_43S	0.245913	0.00198728	0.0343957	0.0107121	0.0174522
REACTOME_BIOLOGICAL_OXIDATIONS	0.246688	0.224553	0.381666	0.388876	0.361655
KEGG_SULFUR_METABOLISM	0.25036	0.201853	0.677564	0.21735	0.548192
REACTOME_CA_DEPENDENT_EVENTS	0.2505	0.0266022	0.257055	0.0536819	0.204761
BIOCARTA_TCAPOPTOSIS_PATHWAY	0.25102	0.243578	0.798444	0.171782	0.48519
REACTOME_TCR_SIGNALING	0.252117	0.224043	0.555575	0.0862424	0.308712
REACTOME_TRANSPORT_OF_VITAMINS_NUCLEOSIDES_AND_RELATED_MOLECULES	0.252276	0.0401313	0.0901967	0.0152841	0.022411
REACTOME_GLUCURONIDATION	0.252934	0.0515161	0.199331	0.0902634	0.113184
REACTOME_LOSS_OF_NLP_FROM_MITOTIC_CENTROSOMES	0.253123	0.148861	0.197519	0.0687415	0.0999712
REACTOME_APOPTOTIC_EXECUTION_PHASE	0.253441	0.527556	0.576784	0.414373	0.629444
REACTOME_STRIATED_MUSCLE_CONTRACTION	0.253726	0.0853908	0.0138946	0.0640668	0.0191863
KEGG_HEDGEHOG_SIGNALING_PATHWAY	0.255244	0.000289301	0.00628134	0.003448	0.000340098
BIOCARTA_SET_PATHWAY	0.255409	0.874314	0.928504	0.943801	0.946613
BIOCARTA_HCMV_PATHWAY	0.256191	0.0994132	0.0369986	0.296641	0.0423046
KEGG_VASOPRESSIN_REGULATED_WATER_REABSORPTION	0.25624	0.10227	0.0687839	0.162909	0.0201346
BIOCARTA_FEEDER_PATHWAY	0.256691	0.0256932	0.0181596	0.0475102	0.0129018
REACTOME_SYNTHESIS_OF_PIPS_AT_THE_PLASMA_MEMBRANE	0.258678	0.676548	0.406225	0.19077	0.391751
REACTOME_EXTRACELLULAR_MATRIX_ORGANIZATION	0.258741	0.622631	0.643428	0.362076	0.629725
REACTOME_NEUROTRANSMITTER_RELEASE_CYCLE	0.259251	0.870513	0.511648	0.697233	0.559968
KEGG_WNT_SIGNALING_PATHWAY	0.259659	0.106782	0.495631	0.183397	0.219231
REACTOME_IL_RECEPTOR_SHC_SIGNALING	0.260913	0.52071	0.494398	0.52632	0.731446
REACTOME_TRNA_AMINOACYLATION	0.263065	0.512306	0.331177	0.236704	0.384251
BIOCARTA_IL10_PATHWAY	0.263228	0.129503	0.600255	0.0973543	0.0986513
BIOCARTA_AHSP_PATHWAY	0.263912	0.239264	0.287569	0.113761	0.368063
REACTOME_SYNTHESIS_OF_PA	0.264406	0.581623	0.236992	0.693097	0.281549
BIOCARTA_P53_PATHWAY	0.26486	0.271885	0.176776	0.306228	0.235819
REACTOME_APOPTOTIC_CLEAVAGE_OF_CELL_ADHESION_PROTEINS	0.265006	0.388438	0.301315	0.214705	0.493633
REACTOME_DEGRADATION_OF_THE_EXTRACELLULAR_MATRIX	0.265189	0.461588	0.544397	0.268029	0.417476
REACTOME_DARPP_32_EVENTS	0.265189	0.18968	0.314145	0.177195	0.25988
BIOCARTA_NOS1_PATHWAY	0.265521	0.0783741	0.911679	0.144282	0.612073
REACTOME_CHONDROITIN_SULFATE_BIOSYNTHESIS	0.2657	0.0747523	0.141535	0.0417016	0.045226
REACTOME_REGULATION_OF_HYPOXIA_INDUCIBLE_FACTOR_HIF_BY_OXYGEN	0.266389	0.197131	0.720151	0.40253	0.386977
REACTOME_TIE2_SIGNALING	0.266416	0.875897	0.151934	0.595544	0.368654
REACTOME_CELL_JUNCTION_ORGANIZATION	0.269353	0.3982	0.0832634	0.34891	0.0591921
BIOCARTA_EDG1_PATHWAY	0.269461	0.580997	0.631725	0.230829	0.73025
REACTOME_RECYCLING_PATHWAY_OF_L1	0.270134	0.474496	0.33598	0.273398	0.521433
KEGG_ECM_RECEPTOR_INTERACTION	0.270597	0.027824	0.0770692	0.0643634	0.0181076
REACTOME_FGFR1_LIGAND_BINDING_AND_ACTIVATION	0.271906	0.462012	0.898408	0.359933	0.512845
BIOCARTA_IL12_PATHWAY	0.274599	0.344362	0.620284	0.310689	0.270238
REACTOME_TRANSLATION	0.274808	0.0087391	0.118986	0.00883008	0.0301297
REACTOME_GLOBAL_GENOMIC_NER_GG_NER	0.275156	0.0279976	0.146821	0.0879147	0.0291306
REACTOME_CD28_CO_STIMULATION	0.275259	0.895837	0.808691	0.547076	0.723004
REACTOME_DOPAMINE_NEUROTRANSMITTER_RELEASE_CYCLE	0.276056	0.618903	0.543338	0.671168	0.425003
REACTOME_PI3K_AKT_ACTIVATION	0.2786	0.729209	0.336314	0.592292	0.475315
REACTOME_SIGNALING_BY_INSULIN_RECEPTOR	0.280246	0.53185	0.604528	0.509948	0.56762
REACTOME_INTEGRATION_OF_ENERGY_METABOLISM	0.280311	0.0866062	0.502565	0.0570822	0.353832
REACTOME_RECRUITMENT_OF_MITOTIC_CENTROSOME_PROTEINS_AND_COMPLEXES	0.280332	0.228616	0.302507	0.115132	0.176536
KEGG_VALINE_LEUCINE_AND_ISOLEUCINE_BIOSYNTHESIS	0.280833	0.806468	0.842425	0.381087	0.811647
REACTOME_MAP_KINASE_ACTIVATION_IN_TLR_CASCADE	0.281802	0.118468	0.0332913	0.284843	0.0741756
REACTOME_ASSOCIATION_OF_LICENSING_FACTORS_WITH_THE_PRE_REPLICATIVE_COMPLEX	0.281823	0.270553	0.945484	0.252442	0.633793
KEGG_PROPANOATE_METABOLISM	0.281856	0.820578	0.176925	0.400119	0.319047
REACTOME_E2F_ENABLED_INHIBITION_OF_PRE_REPLICATION_COMPLEX_FORMATION	0.28366	0.421649	0.569035	0.141325	0.408986
BIOCARTA_GABA_PATHWAY	0.283673	0.908399	0.511696	0.692482	0.705076
REACTOME_TRANSCRIPTIONAL_REGULATION_OF_WHITE_ADIPOCYTE_DIFFERENTIATION	0.285835	0.274759	0.178042	0.164288	0.101384
BIOCARTA_IL2_PATHWAY	0.286591	0.169677	0.457506	0.341404	0.31217
REACTOME_PROSTANOID_LIGAND_RECEPTORS	0.287037	0.559765	0.09477	0.31702	0.259731
REACTOME_CDC6_ASSOCIATION_WITH_THE_ORC_ORIGIN_COMPLEX	0.288163	0.299672	0.472975	0.215295	0.275372
REACTOME_PI3K_CASCADE	0.29014	0.703769	0.704425	0.316795	0.668432
REACTOME_PKA_MEDIATED_PHOSPHORYLATION_OF_CREB	0.290864	0.0666563	0.315718	0.111993	0.153252
REACTOME_IKK_COMPLEX_RECRUITMENT_MEDIATED_BY_RIP1	0.291723	0.646406	0.746486	0.603103	0.759526
REACTOME_HORMONE_LIGAND_BINDING_RECEPTORS	0.292057	0.206685	0.57392	0.133931	0.167456
BIOCARTA_TCR_PATHWAY	0.292693	0.170905	0.197747	0.213242	0.0836874
REACTOME_ACTIVATED_TLR4_SIGNALLING	0.293644	0.13021	0.122902	0.218196	0.0745512
BIOCARTA_WNT_PATHWAY	0.293735	0.322366	0.711967	0.434924	0.302786
BIOCARTA_PLCE_PATHWAY	0.294702	0.171077	0.236973	0.107351	0.304847
REACTOME_REGULATION_OF_COMPLEMENT_CASCADE	0.295053	0.59358	0.89752	0.448312	0.79358
REACTOME_RESPIRATORY_ELECTRON_TRANSPORT	0.296192	0.778434	0.480659	0.546519	0.63394
REACTOME_REGULATION_OF_IFNA_SIGNALING	0.296322	0.139189	0.328654	0.218773	0.123799
KEGG_LYSOSOME	0.297358	0.77633	0.714996	0.716913	0.8699
REACTOME_TRAF6_MEDIATED_IRF7_ACTIVATION_IN_TLR7_8_OR_9_SIGNALING	0.297733	0.00363976	0.150447	0.0206692	0.0130001
REACTOME_COMMON_PATHWAY	0.2981	0.663841	0.394864	0.513085	0.4249
REACTOME_TANDEM_PORE_DOMAIN_POTASSIUM_CHANNELS	0.299706	0.301905	0.821437	0.247623	0.417312
KEGG_PROGESTERONE_MEDIATED_OOCYTE_MATURATION	0.299946	0.495759	0.00410836	0.256387	0.0433229
REACTOME_MITOTIC_G2_G2_M_PHASES	0.300729	0.372656	0.547362	0.24455	0.334009
BIOCARTA_TID_PATHWAY	0.300997	0.100486	0.422282	0.181331	0.160154
BIOCARTA_NO1_PATHWAY	0.301189	0.0717891	0.441476	0.116739	0.24497
REACTOME_GABA_SYNTHESIS_RELEASE_REUPTAKE_AND_DEGRADATION	0.302587	0.787566	0.825799	0.804132	0.745648
BIOCARTA_BARRESTIN_SRC_PATHWAY	0.302855	0.0722742	0.17237	0.286588	0.159156
REACTOME_CLASS_B_2_SECRETIN_FAMILY_RECEPTORS	0.303069	0.152929	0.364327	0.148345	0.415761
BIOCARTA_BCELLSURVIVAL_PATHWAY	0.303248	0.424322	0.0272571	0.320394	0.178233
KEGG_PYRUVATE_METABOLISM	0.303901	0.234693	0.13742	0.244703	0.101312
REACTOME_TRAF6_MEDIATED_INDUCTION_OF_NFKB_AND_MAP_KINASES_UPON_TLR7_8_OR_9_ACTIVATION	0.304029	0.0369937	0.0690735	0.116077	0.0350494
REACTOME_GROWTH_HORMONE_RECEPTOR_SIGNALING	0.304796	0.0683373	0.734042	0.152316	0.379507
REACTOME_P75_NTR_RECEPTOR_MEDIATED_SIGNALLING	0.30482	0.297371	0.322366	0.299745	0.378213
REACTOME_PLATELET_SENSITIZATION_BY_LDL	0.305642	0.293558	0.179976	0.169413	0.149652
KEGG_CHEMOKINE_SIGNALING_PATHWAY	0.306194	0.0626429	0.231365	0.144372	0.15077
BIOCARTA_RB_PATHWAY	0.306473	0.83384	0.0752898	0.715742	0.276834
REACTOME_SYNTHESIS_SECRETION_AND_INACTIVATION_OF_GLP1	0.306718	0.0449823	0.314081	0.0923418	0.175475
KEGG_ACUTE_MYELOID_LEUKEMIA	0.30797	0.139568	0.0847469	0.427669	0.145563
REACTOME_NOTCH_HLH_TRANSCRIPTION_PATHWAY	0.308615	0.353042	0.414111	0.476578	0.212744
REACTOME_TRAF6_MEDIATED_NFKB_ACTIVATION	0.309048	0.64303	0.786369	0.387181	0.59235
REACTOME_INTERACTION_BETWEEN_L1_AND_ANKYRINS	0.309358	0.204793	0.586898	0.43646	0.203636
REACTOME_LATE_PHASE_OF_HIV_LIFE_CYCLE	0.311668	0.299721	0.904561	0.502276	0.856076
BIOCARTA_PTEN_PATHWAY	0.31355	0.218581	0.4526	0.535855	0.676485
REACTOME_CD28_DEPENDENT_PI3K_AKT_SIGNALING	0.313862	0.863139	0.66396	0.54745	0.690911
KEGG_PORPHYRIN_AND_CHLOROPHYLL_METABOLISM	0.31443	0.229782	0.067035	0.291953	0.136253
KEGG_GLYCOSPHINGOLIPID_BIOSYNTHESIS_GLOBO_SERIES	0.314598	0.465145	0.972368	0.516046	0.854649
REACTOME_ABORTIVE_ELONGATION_OF_HIV1_TRANSCRIPT_IN_THE_ABSENCE_OF_TAT	0.316232	0.615205	0.979979	0.537768	0.894564
REACTOME_SIGNAL_TRANSDUCTION_BY_L1	0.316629	0.53204	0.721559	0.595643	0.544985
KEGG_AMINOACYL_TRNA_BIOSYNTHESIS	0.317366	0.722164	0.535497	0.403252	0.595064
BIOCARTA_CTL_PATHWAY	0.317421	0.549066	0.515333	0.389834	0.682145
BIOCARTA_PLATELETAPP_PATHWAY	0.317706	0.562269	0.107347	0.607022	0.163994
REACTOME_SHC_RELATED_EVENTS	0.318193	0.151638	0.126795	0.607711	0.134191
REACTOME_NFKB_AND_MAP_KINASES_ACTIVATION_MEDIATED_BY_TLR4_SIGNALING_REPERTOIRE	0.318399	0.232498	0.183177	0.362338	0.240817
KEGG_PYRIMIDINE_METABOLISM	0.319628	0.274138	0.601614	0.136797	0.291303
KEGG_LIMONENE_AND_PINENE_DEGRADATION	0.320949	0.785064	0.572937	0.326358	0.731527
BIOCARTA_BARR_MAPK_PATHWAY	0.321007	0.0941478	0.157122	0.218886	0.222815
BIOCARTA_THELPER_PATHWAY	0.323294	0.365229	0.608427	0.162761	0.464518
REACTOME_PHOSPHOLIPASE_C_MEDIATED_CASCADE	0.324035	0.149393	0.576539	0.19048	0.351456
REACTOME_FORMATION_OF_THE_HIV1_EARLY_ELONGATION_COMPLEX	0.326391	0.727796	0.996194	0.673676	0.934061
KEGG_PRION_DISEASES	0.327219	0.050192	0.227345	0.283185	0.136015
BIOCARTA_VITCB_PATHWAY	0.329647	0.468109	0.236666	0.473738	0.266776
REACTOME_NEURONAL_SYSTEM	0.332527	0.141927	0.884859	0.381362	0.328592
REACTOME_G0_AND_EARLY_G1	0.33259	0.870792	0.754609	0.465132	0.705731
REACTOME_COLLAGEN_FORMATION	0.334756	0.644238	0.616409	0.470228	0.681242
REACTOME_PI_3K_CASCADE	0.335234	0.41325	0.286737	0.469149	0.198651
REACTOME_SHC_MEDIATED_CASCADE	0.337536	0.448107	0.770609	0.559949	0.52205
REACTOME_NEGATIVE_REGULATION_OF_FGFR_SIGNALING	0.338498	0.372011	0.907144	0.378722	0.766779
REACTOME_RESPIRATORY_ELECTRON_TRANSPORT_ATP_SYNTHESIS_BY_CHEMIOSMOTIC_COUPLING_AND_HEAT_PRODUCTION_BY_UNCOUPLING_PROTEINS_	0.339612	0.464703	0.381851	0.393381	0.321579
BIOCARTA_CK1_PATHWAY	0.339703	0.295127	0.297142	0.317924	0.20452
REACTOME_PLATELET_ACTIVATION_SIGNALING_AND_AGGREGATION	0.339723	0.0333936	0.123897	0.0707408	0.048726
BIOCARTA_MAL_PATHWAY	0.343778	0.0805709	0.212579	0.379117	0.0666494
REACTOME_GPCR_DOWNSTREAM_SIGNALING	0.346529	0.765591	0.0574931	0.510095	0.385014
REACTOME_ROLE_OF_DCC_IN_REGULATING_APOPTOSIS	0.346798	0.329711	0.735756	0.332753	0.402772
KEGG_INOSITOL_PHOSPHATE_METABOLISM	0.349798	0.684473	0.615843	0.414812	0.76397
REACTOME_NETRIN1_SIGNALING	0.350266	0.433211	0.505502	0.424857	0.275148
BIOCARTA_CARM1_PATHWAY	0.350303	0.404691	0.286131	0.48103	0.308251
REACTOME_DOWNREGULATION_OF_ERBB2_ERBB3_SIGNALING	0.35211	0.294519	0.12043	0.223742	0.124831
BIOCARTA_PS1_PATHWAY	0.352291	0.587383	0.228974	0.324703	0.19741
REACTOME_HIV_LIFE_CYCLE	0.353631	0.107627	0.757623	0.323657	0.507674
BIOCARTA_MYOSIN_PATHWAY	0.355135	0.0771089	0.827872	0.050264	0.704711
REACTOME_PLC_BETA_MEDIATED_EVENTS	0.355138	0.115299	0.463351	0.103598	0.545582
KEGG_NUCLEOTIDE_EXCISION_REPAIR	0.35634	0.0405461	0.153644	0.0870258	0.0359812
REACTOME_DOWNSTREAM_TCR_SIGNALING	0.358085	0.124885	0.574031	0.109104	0.327588
BIOCARTA_EXTRINSIC_PATHWAY	0.359411	0.422829	0.255959	0.360595	0.30265
REACTOME_GLUCAGON_TYPE_LIGAND_RECEPTORS	0.359426	0.0963564	0.823883	0.122003	0.76794
REACTOME_RECYCLING_OF_BILE_ACIDS_AND_SALTS	0.361033	0.20119	0.0168671	0.17261	0.0579416
REACTOME_SYNTHESIS_OF_DNA	0.362086	0.0120067	0.000648258	0.0739218	0.00222812
REACTOME_FATTY_ACID_TRIACYLGLYCEROL_AND_KETONE_BODY_METABOLISM	0.362424	0.779215	0.0455985	0.596358	0.181798
REACTOME_PRE_NOTCH_EXPRESSION_AND_PROCESSING	0.363031	0.646041	0.750175	0.60938	0.496457
REACTOME_BILE_ACID_AND_BILE_SALT_METABOLISM	0.363429	0.267403	0.186337	0.279852	0.298827
BIOCARTA_SKP2E2F_PATHWAY	0.363933	0.914915	0.403442	0.522886	0.69222
REACTOME_SYNTHESIS_AND_INTERCONVERSION_OF_NUCLEOTIDE_DI_AND_TRIPHOSPHATES	0.364708	0.489431	0.71789	0.39872	0.549845
REACTOME_FRS2_MEDIATED_CASCADE	0.365645	0.243059	0.482684	0.588121	0.24767
REACTOME_ERKS_ARE_INACTIVATED	0.36566	0.669498	0.86649	0.466377	0.783729
REACTOME_DSCAM_INTERACTIONS	0.367899	0.161323	0.170978	0.261915	0.0345455
REACTOME_GLYCOGEN_BREAKDOWN_GLYCOGENOLYSIS	0.370064	0.174894	0.0742607	0.290346	0.0653534
REACTOME_CIRCADIAN_CLOCK	0.371054	0.2812	0.117786	0.314238	0.141571
REACTOME_SIGNALING_BY_ILS	0.371896	0.143372	0.70075	0.459588	0.483251
BIOCARTA_NO2IL12_PATHWAY	0.373254	0.390054	0.888198	0.425715	0.541631
REACTOME_REGULATED_PROTEOLYSIS_OF_P75NTR	0.373812	0.182712	0.312751	0.188516	0.244874
REACTOME_SRP_DEPENDENT_COTRANSLATIONAL_PROTEIN_TARGETING_TO_MEMBRANE	0.375072	0.0473046	0.170907	0.0722864	0.0795952
REACTOME_ACTIVATION_OF_THE_PRE_REPLICATIVE_COMPLEX	0.375351	0.649623	0.308373	0.27646	0.402631
REACTOME_ABACAVIR_TRANSPORT_AND_METABOLISM	0.375661	0.783459	0.307794	0.613337	0.503818
KEGG_MELANOGENESIS	0.377135	0.0228432	0.286025	0.287482	0.0798149
KEGG_GLYCINE_SERINE_AND_THREONINE_METABOLISM	0.380198	0.324709	0.702346	0.443407	0.835168
REACTOME_S_PHASE	0.380693	0.0216147	0.00412952	0.0863539	0.00795519
KEGG_PHENYLALANINE_METABOLISM	0.381761	0.686241	0.465974	0.41722	0.610994
REACTOME_ACTIVATION_OF_BH3_ONLY_PROTEINS	0.381841	0.699903	0.711399	0.656961	0.886366
REACTOME_PIP3_ACTIVATES_AKT_SIGNALING	0.382861	0.379637	0.489491	0.654712	0.363795
KEGG_FOLATE_BIOSYNTHESIS	0.3838	0.7931	0.584341	0.558029	0.601854
KEGG_ERBB_SIGNALING_PATHWAY	0.384886	0.391648	0.00450013	0.743239	0.0426085
REACTOME_RNA_POL_II_TRANSCRIPTION	0.385249	0.213518	0.732111	0.176181	0.58245
REACTOME_NUCLEOTIDE_EXCISION_REPAIR	0.388565	0.047036	0.421469	0.136541	0.0729005
BIOCARTA_HIF_PATHWAY	0.388736	0.387258	0.307701	0.556465	0.213063
BIOCARTA_CDK5_PATHWAY	0.390744	0.12681	0.440227	0.893376	0.288488
REACTOME_ERK_MAPK_TARGETS	0.391402	0.471822	0.502596	0.388311	0.297426
BIOCARTA_BAD_PATHWAY	0.391532	0.104868	0.0512455	0.0832592	0.260385
REACTOME_NONSENSE_MEDIATED_DECAY_ENHANCED_BY_THE_EXON_JUNCTION_COMPLEX	0.391897	0.0406425	0.282927	0.0919795	0.0546057
REACTOME_IMMUNE_SYSTEM	0.392131	0.0917284	0.163672	0.218065	0.173512
REACTOME_SEMA4D_IN_SEMAPHORIN_SIGNALING	0.393525	0.238601	0.0366001	0.281621	0.0662106
REACTOME_INTERFERON_GAMMA_SIGNALING	0.394265	0.0551696	0.304593	0.35911	0.0960529
REACTOME_CIRCADIAN_REPRESSION_OF_EXPRESSION_BY_REV_ERBA	0.394399	0.279321	0.0801219	0.345277	0.0912632
REACTOME_XENOBIOTICS	0.396052	0.657131	0.476451	0.622841	0.50543
REACTOME_METABOLISM_OF_PORPHYRINS	0.397401	0.31089	0.312085	0.321288	0.30515
BIOCARTA_RHO_PATHWAY	0.398	0.0261134	0.137853	0.0764407	0.0812194
REACTOME_ACTIVATED_POINT_MUTANTS_OF_FGFR2	0.399522	0.289807	0.501029	0.393318	0.280569
REACTOME_ENDOSOMAL_VACUOLAR_PATHWAY	0.400154	0.899307	0.98402	0.985243	0.976236
REACTOME_IRAK1_RECRUITS_IKK_COMPLEX	0.400323	0.0310715	0.368861	0.0861402	0.0800287
REACTOME_GLYCOLYSIS	0.400345	0.652454	0.604058	0.396566	0.681202
BIOCARTA_TNFR2_PATHWAY	0.40118	0.585745	0.341899	0.471871	0.215145
REACTOME_G_ALPHA_Z_SIGNALLING_EVENTS	0.40122	0.107645	0.91997	0.242885	0.690794
REACTOME_PROCESSING_OF_CAPPED_INTRONLESS_PRE_MRNA	0.4019	0.123562	0.480618	0.0674615	0.253817
REACTOME_G_ALPHA1213_SIGNALLING_EVENTS	0.403358	0.18825	0.661525	0.150223	0.687034
BIOCARTA_P53HYPOXIA_PATHWAY	0.403579	0.0257987	0.0719844	0.125401	0.0576989
REACTOME_RORA_ACTIVATES_CIRCADIAN_EXPRESSION	0.403865	0.176295	0.035082	0.37676	0.0521442
REACTOME_EARLY_PHASE_OF_HIV_LIFE_CYCLE	0.404313	0.0120405	0.058752	0.0630442	0.0118236
REACTOME_G1_S_SPECIFIC_TRANSCRIPTION	0.404395	0.924635	0.744528	0.763639	0.679021
KEGG_TASTE_TRANSDUCTION	0.404654	0.0571767	0.670116	0.0470506	0.582511
BIOCARTA_RNA_PATHWAY	0.405298	0.45088	0.155877	0.253685	0.110719
REACTOME_COMPLEMENT_CASCADE	0.406449	0.860842	0.44028	0.769255	0.761105
REACTOME_AMYLOIDS	0.408873	0.471542	0.210445	0.196687	0.259403
REACTOME_RNA_POL_I_PROMOTER_OPENING	0.410764	0.604012	0.347559	0.342655	0.381673
REACTOME_PYRIMIDINE_CATABOLISM	0.410951	0.82725	0.956794	0.366599	0.804109
KEGG_BIOSYNTHESIS_OF_UNSATURATED_FATTY_ACIDS	0.411801	0.110213	0.0914945	0.248213	0.0916171
BIOCARTA_EGFR_SMRTE_PATHWAY	0.412285	0.0807198	0.0322572	0.555456	0.00905656
REACTOME_L1CAM_INTERACTIONS	0.414147	0.242534	0.248868	0.43599	0.117904
REACTOME_AMINO_ACID_SYNTHESIS_AND_INTERCONVERSION_TRANSAMINATION	0.414606	0.560216	0.829113	0.38809	0.739817
BIOCARTA_RACCYCD_PATHWAY	0.414706	0.100576	0.0720841	0.315493	0.119939
BIOCARTA_LEPTIN_PATHWAY	0.416812	0.755386	0.229121	0.435578	0.540312
BIOCARTA_NFAT_PATHWAY	0.417285	0.0222107	0.3097	0.239391	0.0876744
REACTOME_ADAPTIVE_IMMUNE_SYSTEM	0.417306	0.156698	0.129669	0.186862	0.142953
REACTOME_CYTOSOLIC_SULFONATION_OF_SMALL_MOLECULES	0.417747	0.319531	0.890111	0.546075	0.707101
REACTOME_P75NTR_RECRUITS_SIGNALLING_COMPLEXES	0.418141	0.258144	0.81035	0.569505	0.660594
REACTOME_OTHER_SEMAPHORIN_INTERACTIONS	0.419739	0.570309	0.446801	0.565742	0.456899
BIOCARTA_IL6_PATHWAY	0.421376	0.00615448	0.129139	0.083672	0.00787891
REACTOME_ACETYLCHOLINE_NEUROTRANSMITTER_RELEASE_CYCLE	0.422088	0.611829	0.603406	0.655094	0.413928
REACTOME_DIGESTION_OF_DIETARY_CARBOHYDRATE	0.422361	0.548532	0.107964	0.448392	0.171724
REACTOME_PROCESSING_OF_INTRONLESS_PRE_MRNAS	0.423626	0.156512	0.140372	0.0928933	0.0711186
REACTOME_SIGNALING_BY_GPCR	0.424583	0.621687	0.0423068	0.481136	0.240496
REACTOME_ROLE_OF_SECOND_MESSENGERS_IN_NETRIN1_SIGNALING	0.424824	0.161974	0.110831	0.179576	0.0955981
KEGG_BETA_ALANINE_METABOLISM	0.425317	0.894756	0.520005	0.521648	0.831623
KEGG_PENTOSE_AND_GLUCURONATE_INTERCONVERSIONS	0.425472	0.256319	0.598202	0.37376	0.513016
BIOCARTA_MTA3_PATHWAY	0.428732	0.415464	0.742152	0.436832	0.326589
BIOCARTA_ATM_PATHWAY	0.431085	0.0630543	0.20101	0.303217	0.102617
REACTOME_SIGNALING_BY_ACTIVATED_POINT_MUTANTS_OF_FGFR1	0.432622	0.331247	0.806853	0.34707	0.3617
REACTOME_CELL_DEATH_SIGNALLING_VIA_NRAGE_NRIF_AND_NADE	0.432689	0.363621	0.371378	0.483936	0.545699
BIOCARTA_PITX2_PATHWAY	0.43321	0.791876	0.208525	0.770852	0.258172
KEGG_OXIDATIVE_PHOSPHORYLATION	0.433986	0.329141	0.188287	0.312884	0.24172
REACTOME_SIGNALING_BY_FGFR_MUTANTS	0.434214	0.435286	0.207418	0.319115	0.184383
REACTOME_TRANSPORT_OF_INORGANIC_CATIONS_ANIONS_AND_AMINO_ACIDS_OLIGOPEPTIDES	0.435131	0.0664791	0.295521	0.106588	0.127851
REACTOME_ACTIVATION_OF_IRF3_IRF7_MEDIATED_BY_TBK1_IKK_EPSILON	0.436979	0.705968	0.645313	0.712514	0.706586
REACTOME_REGULATION_OF_INSULIN_SECRETION	0.438269	0.139029	0.514632	0.146973	0.631326
REACTOME_ANTIGEN_PROCESSING_UBIQUITINATION_PROTEASOME_DEGRADATION	0.440276	0.447052	0.644603	0.366231	0.638353
BIOCARTA_RANMS_PATHWAY	0.441132	0.948738	0.760148	0.597667	0.943736
REACTOME_SULFUR_AMINO_ACID_METABOLISM	0.445211	0.0656697	0.146411	0.215614	0.0937269
REACTOME_SEMA4D_INDUCED_CELL_MIGRATION_AND_GROWTH_CONE_COLLAPSE	0.446	0.112309	0.053105	0.250431	0.0571815
KEGG_METABOLISM_OF_XENOBIOTICS_BY_CYTOCHROME_P450	0.446511	0.791295	0.753521	0.602744	0.863349
KEGG_DILATED_CARDIOMYOPATHY	0.447413	0.0401247	0.576959	0.120536	0.170905
REACTOME_CTLA4_INHIBITORY_SIGNALING	0.447559	0.0598657	0.778918	0.202269	0.240668
REACTOME_ACTIVATION_OF_RAC	0.447833	0.84919	0.814448	0.661023	0.708562
REACTOME_INTERACTIONS_OF_VPR_WITH_HOST_CELLULAR_PROTEINS	0.448546	0.0496007	0.331945	0.473274	0.194923
BIOCARTA_AKT_PATHWAY	0.449608	0.378727	0.140186	0.364133	0.18671
REACTOME_TGF_BETA_RECEPTOR_SIGNALING_IN_EMT_EPITHELIAL_TO_MESENCHYMAL_TRANSITION	0.449708	0.19429	0.103916	0.392498	0.197386
REACTOME_P75NTR_SIGNALS_VIA_NFKB	0.455688	0.348711	0.689019	0.520971	0.600816
BIOCARTA_MEF2D_PATHWAY	0.455899	0.521921	0.879576	0.415533	0.867471
REACTOME_GABA_A_RECEPTOR_ACTIVATION	0.456987	0.364916	0.65066	0.339114	0.422061
REACTOME_INHIBITION_OF_REPLICATION_INITIATION_OF_DAMAGED_DNA_BY_RB1_E2F1	0.457424	0.590655	0.526043	0.35441	0.52355
REACTOME_METABOLISM_OF_LIPIDS_AND_LIPOPROTEINS	0.457772	0.835741	0.142186	0.569412	0.307071
REACTOME_HS_GAG_BIOSYNTHESIS	0.458278	0.488667	0.229981	0.483646	0.511292
KEGG_NON_HOMOLOGOUS_END_JOINING	0.460763	0.14927	0.66007	0.275726	0.40028
REACTOME_AQUAPORIN_MEDIATED_TRANSPORT	0.461173	0.00660105	0.799621	0.0537252	0.25891
REACTOME_PECAM1_INTERACTIONS	0.46129	0.754914	0.798377	0.781205	0.888334
BIOCARTA_LONGEVITY_PATHWAY	0.461744	0.149694	0.270239	0.58761	0.271679
REACTOME_VEGF_LIGAND_RECEPTOR_INTERACTIONS	0.46277	0.317199	0.579573	0.441791	0.396582
REACTOME_LYSOSOME_VESICLE_BIOGENESIS	0.464718	0.22334	0.627321	0.155323	0.589984
REACTOME_EICOSANOID_LIGAND_BINDING_RECEPTORS	0.467173	0.58276	0.0438367	0.361725	0.204275
REACTOME_PRE_NOTCH_TRANSCRIPTION_AND_TRANSLATION	0.468198	0.533765	0.595546	0.75666	0.494808
BIOCARTA_CXCR4_PATHWAY	0.468399	0.40223	0.347899	0.571726	0.391743
REACTOME_CALNEXIN_CALRETICULIN_CYCLE	0.468938	0.7179	0.275201	0.443519	0.446761
BIOCARTA_BIOPEPTIDES_PATHWAY	0.469989	0.0452297	0.402611	0.488366	0.0855629
REACTOME_NCAM1_INTERACTIONS	0.470294	0.396973	0.676195	0.405143	0.316897
REACTOME_GAP_JUNCTION_ASSEMBLY	0.471326	0.829924	0.663386	0.827058	0.730023
REACTOME_GPVI_MEDIATED_ACTIVATION_CASCADE	0.471957	0.535921	0.457924	0.521158	0.548318
REACTOME_P2Y_RECEPTORS	0.472096	0.150162	0.282826	0.411086	0.232125
BIOCARTA_PPARA_PATHWAY	0.472744	0.700861	0.0731635	0.345807	0.41986
REACTOME_GLUCOSE_METABOLISM	0.473007	0.346359	0.355805	0.411421	0.307577
REACTOME_CD28_DEPENDENT_VAV1_PATHWAY	0.473242	0.316218	0.842132	0.510354	0.491849
REACTOME_UNWINDING_OF_DNA	0.474431	0.376501	0.0582444	0.409761	0.068484
REACTOME_RESPONSE_TO_ELEVATED_PLATELET_CYTOSOLIC_CA2_	0.475437	0.0637783	0.326895	0.187033	0.101087
REACTOME_RNA_POL_II_TRANSCRIPTION_PRE_INITIATION_AND_PROMOTER_OPENING	0.475757	0.366001	0.871801	0.463163	0.892156
REACTOME_REGULATION_OF_IFNG_SIGNALING	0.477357	0.256805	0.564877	0.403392	0.368939
REACTOME_REGULATION_OF_INSULIN_SECRETION_BY_ACETYLCHOLINE	0.482017	0.373396	0.771462	0.221364	0.683169
REACTOME_POST_CHAPERONIN_TUBULIN_FOLDING_PATHWAY	0.482951	0.631136	0.383194	0.608088	0.411146
REACTOME_N_GLYCAN_ANTENNAE_ELONGATION	0.485113	0.943277	0.63036	0.684206	0.822995
KEGG_SPHINGOLIPID_METABOLISM	0.485629	0.674038	0.394733	0.726274	0.605763
REACTOME_PASSIVE_TRANSPORT_BY_AQUAPORINS	0.4875	0.2963	0.801252	0.595906	0.506723
BIOCARTA_TPO_PATHWAY	0.488948	0.753243	0.327963	0.796779	0.425214
BIOCARTA_IGF1MTOR_PATHWAY	0.489957	0.357876	0.116667	0.382252	0.383766
REACTOME_SLBP_DEPENDENT_PROCESSING_OF_REPLICATION_DEPENDENT_HISTONE_PRE_MRNAS	0.490209	0.271192	0.984614	0.238332	0.888125
REACTOME_GENERATION_OF_SECOND_MESSENGER_MOLECULES	0.491087	0.395066	0.52175	0.390706	0.296971
REACTOME_RNA_POL_I_TRANSCRIPTION_INITIATION	0.491295	0.916602	0.924206	0.650427	0.785003
REACTOME_IL_6_SIGNALING	0.492136	0.154274	0.510806	0.532127	0.290149
REACTOME_MICRORNA_MIRNA_BIOGENESIS	0.492343	0.488054	0.722005	0.720629	0.742235
REACTOME_NUCLEOTIDE_LIKE_PURINERGIC_RECEPTORS	0.493342	0.205019	0.122212	0.423411	0.0970651
REACTOME_DCC_MEDIATED_ATTRACTIVE_SIGNALING	0.494286	0.391868	0.714622	0.426628	0.595031
REACTOME_PROTEOLYTIC_CLEAVAGE_OF_SNARE_COMPLEX_PROTEINS	0.494592	0.113756	0.776535	0.371654	0.243835
REACTOME_RNA_POL_I_TRANSCRIPTION	0.49518	0.716864	0.828283	0.494189	0.489219
REACTOME_REGULATION_OF_SIGNALING_BY_CBL	0.495529	0.852816	0.585804	0.601783	0.830836
REACTOME_DNA_REPLICATION	0.496238	0.025842	0.000672398	0.0951501	0.00120962
REACTOME_IL_3_5_AND_GM_CSF_SIGNALING	0.496536	0.621998	0.6322	0.663959	0.919007
REACTOME_VIRAL_MESSENGER_RNA_SYNTHESIS	0.49733	0.38517	0.938806	0.486212	0.742159
BIOCARTA_EIF_PATHWAY	0.498001	0.674762	0.440952	0.545118	0.332171
REACTOME_NUCLEAR_SIGNALING_BY_ERBB4	0.498093	0.516471	0.719161	0.34778	0.507299
REACTOME_CYCLIN_A_B1_ASSOCIATED_EVENTS_DURING_G2_M_TRANSITION	0.501262	0.943868	0.635556	0.752494	0.755114
REACTOME_CELL_SURFACE_INTERACTIONS_AT_THE_VASCULAR_WALL	0.501897	0.474108	0.278679	0.609725	0.185801
REACTOME_ENDOGENOUS_STEROLS	0.504466	0.746657	0.789319	0.648685	0.883728
KEGG_SELENOAMINO_ACID_METABOLISM	0.505088	0.184926	0.716193	0.336322	0.464557
REACTOME_PROLACTIN_RECEPTOR_SIGNALING	0.50544	0.894828	0.853989	0.755682	0.941458
REACTOME_OPIOID_SIGNALLING	0.506836	0.0481451	0.572167	0.115457	0.498358
BIOCARTA_IL17_PATHWAY	0.508446	0.305175	0.806187	0.395656	0.452704
REACTOME_SEROTONIN_RECEPTORS	0.508978	0.823657	0.551932	0.81015	0.787193
REACTOME_MUSCLE_CONTRACTION	0.51002	0.226427	0.0250054	0.132846	0.0660806
REACTOME_INITIAL_TRIGGERING_OF_COMPLEMENT	0.512319	0.932713	0.563226	0.918428	0.955403
REACTOME_MITOCHONDRIAL_PROTEIN_IMPORT	0.512685	0.966815	0.702829	0.889558	0.929045
REACTOME_GLYCOPROTEIN_HORMONES	0.513521	0.746368	0.895696	0.453539	0.833343
BIOCARTA_TFF_PATHWAY	0.513791	0.39026	0.411414	0.450474	0.480294
BIOCARTA_SPPA_PATHWAY	0.513851	0.297554	0.284991	0.470857	0.266937
REACTOME_PLATELET_CALCIUM_HOMEOSTASIS	0.514032	0.480429	0.42734	0.138964	0.456043
REACTOME_RECRUITMENT_OF_NUMA_TO_MITOTIC_CENTROSOMES	0.514625	0.489176	0.773948	0.492793	0.663121
BIOCARTA_ETC_PATHWAY	0.515284	0.467557	0.267872	0.501317	0.382612
KEGG_HEMATOPOIETIC_CELL_LINEAGE	0.518611	0.0603788	0.652576	0.225318	0.21956
BIOCARTA_CALCINEURIN_PATHWAY	0.519498	0.234617	0.427873	0.387495	0.425064
KEGG_VIRAL_MYOCARDITIS	0.521688	0.108377	0.502736	0.414879	0.406428
REACTOME_FGFR4_LIGAND_BINDING_AND_ACTIVATION	0.524642	0.302645	0.728398	0.37975	0.412289
BIOCARTA_VIP_PATHWAY	0.524828	0.163599	0.706455	0.169295	0.445273
BIOCARTA_AGR_PATHWAY	0.526388	0.344939	0.621394	0.374086	0.322347
REACTOME_FORMATION_OF_TUBULIN_FOLDING_INTERMEDIATES_BY_CCT_TRIC	0.527768	0.854927	0.27888	0.679948	0.445777
REACTOME_MITOTIC_PROMETAPHASE	0.528598	0.253961	0.0408293	0.227894	0.0626131
REACTOME_REGULATORY_RNA_PATHWAYS	0.52949	0.490678	0.847779	0.769059	0.835684
KEGG_TERPENOID_BACKBONE_BIOSYNTHESIS	0.530049	0.920877	0.262529	0.966224	0.795936
BIOCARTA_DREAM_PATHWAY	0.530971	0.209977	0.407929	0.167068	0.364492
REACTOME_PEPTIDE_HORMONE_BIOSYNTHESIS	0.531325	0.661104	0.886508	0.454187	0.823041
KEGG_PROXIMAL_TUBULE_BICARBONATE_RECLAMATION	0.531806	0.428251	0.760419	0.718193	0.518392
REACTOME_ANDROGEN_BIOSYNTHESIS	0.533154	0.533258	0.82088	0.414182	0.922566
REACTOME_BINDING_AND_ENTRY_OF_HIV_VIRION	0.534144	0.214461	0.30959	0.287954	0.102143
REACTOME_PHOSPHORYLATION_OF_THE_APC_C	0.534413	0.789577	0.0867985	0.414651	0.229892
REACTOME_TRAF3_DEPENDENT_IRF_ACTIVATION_PATHWAY	0.534953	0.896106	0.559676	0.898968	0.635473
REACTOME_IRON_UPTAKE_AND_TRANSPORT	0.539059	0.535242	0.965007	0.798582	0.889008
REACTOME_PURINE_CATABOLISM	0.540508	0.591049	0.514184	0.334063	0.661458
BIOCARTA_LYM_PATHWAY	0.542327	0.275161	0.313897	0.363281	0.201806
REACTOME_CGMP_EFFECTS	0.545361	0.901913	0.312614	0.618479	0.594759
REACTOME_DEPOSITION_OF_NEW_CENPA_CONTAINING_NUCLEOSOMES_AT_THE_CENTROMERE	0.546173	0.964648	0.492911	0.765206	0.827388
REACTOME_METABOLISM_OF_NON_CODING_RNA	0.546653	0.0498393	0.649422	0.320455	0.387689
BIOCARTA_CYTOKINE_PATHWAY	0.549352	0.387945	0.26241	0.540354	0.44908
REACTOME_REGULATION_OF_WATER_BALANCE_BY_RENAL_AQUAPORINS	0.551815	0.00328161	0.720378	0.0346927	0.182699
BIOCARTA_RAB_PATHWAY	0.553115	0.66193	0.40382	0.382785	0.342001
REACTOME_MRNA_DECAY_BY_5_TO_3_EXORIBONUCLEASE	0.553236	0.91167	0.707574	0.956106	0.830303
BIOCARTA_EPHA4_PATHWAY	0.555324	0.422937	0.859	0.246331	0.606056
REACTOME_SIGNAL_AMPLIFICATION	0.555376	0.0776083	0.651953	0.206928	0.445993
BIOCARTA_TH1TH2_PATHWAY	0.556467	0.101862	0.903063	0.296539	0.656308
REACTOME_MTORC1_MEDIATED_SIGNALLING	0.557378	0.788903	0.96259	0.675651	0.941939
REACTOME_FGFR2C_LIGAND_BINDING_AND_ACTIVATION	0.55758	0.418757	0.51444	0.473204	0.377617
BIOCARTA_CREB_PATHWAY	0.558308	0.100629	0.0905736	0.252889	0.11982
KEGG_PHOSPHATIDYLINOSITOL_SIGNALING_SYSTEM	0.558379	0.779626	0.799771	0.528574	0.752561
REACTOME_SIGNALING_BY_NOTCH2	0.559058	0.371227	0.855324	0.29423	0.703731
REACTOME_FGFR_LIGAND_BINDING_AND_ACTIVATION	0.560452	0.4108	0.733089	0.521888	0.496968
REACTOME_INTERFERON_ALPHA_BETA_SIGNALING	0.560999	0.0943286	0.616365	0.589143	0.182282
BIOCARTA_SHH_PATHWAY	0.561535	0.166115	0.322005	0.146608	0.150994
BIOCARTA_BARRESTIN_PATHWAY	0.563965	0.411358	0.426143	0.180812	0.533358
REACTOME_TRANSPORT_OF_RIBONUCLEOPROTEINS_INTO_THE_HOST_NUCLEUS	0.564854	0.0951333	0.449239	0.615206	0.286513
REACTOME_BASIGIN_INTERACTIONS	0.564948	0.333096	0.543074	0.308585	0.372446
REACTOME_TRANSPORT_OF_MATURE_MRNA_DERIVED_FROM_AN_INTRONLESS_TRANSCRIPT	0.566999	0.0139083	0.50051	0.302692	0.14323
REACTOME_SIGNALING_BY_FGFR1_MUTANTS	0.56743	0.425709	0.471318	0.327266	0.355257
REACTOME_N_GLYCAN_ANTENNAE_ELONGATION_IN_THE_MEDIAL_TRANS_GOLGI	0.56754	0.968137	0.665961	0.836791	0.93838
REACTOME_RAP1_SIGNALLING	0.570411	0.750142	0.372887	0.720629	0.668093
REACTOME_BOTULINUM_NEUROTOXICITY	0.57555	0.171255	0.76733	0.476957	0.284573
REACTOME_TRANSCRIPTION	0.579025	0.458106	0.771845	0.376515	0.577359
REACTOME_FORMATION_OF_FIBRIN_CLOT_CLOTTING_CASCADE	0.581583	0.865785	0.874855	0.868699	0.936141
KEGG_GLYCOSAMINOGLYCAN_BIOSYNTHESIS_KERATAN_SULFATE	0.582656	0.429442	0.880507	0.517201	0.604644
REACTOME_PACKAGING_OF_TELOMERE_ENDS	0.582795	0.40152	0.102271	0.273192	0.388973
REACTOME_APOBEC3G_MEDIATED_RESISTANCE_TO_HIV1_INFECTION	0.583259	0.0845817	0.157343	0.21375	0.0740875
REACTOME_ENDOSOMAL_SORTING_COMPLEX_REQUIRED_FOR_TRANSPORT_ESCRT	0.584248	0.211648	0.763079	0.285226	0.656838
REACTOME_TRAF6_MEDIATED_INDUCTION_OF_TAK1_COMPLEX	0.584695	0.36779	0.848925	0.489716	0.775218
REACTOME_LIPID_DIGESTION_MOBILIZATION_AND_TRANSPORT	0.587334	0.508957	0.0820143	0.454543	0.177822
BIOCARTA_LAIR_PATHWAY	0.588271	0.424042	0.201068	0.474195	0.258163
BIOCARTA_HSP27_PATHWAY	0.589326	0.407017	0.718329	0.242592	0.527205
BIOCARTA_ECM_PATHWAY	0.591407	0.221876	0.0796656	0.489385	0.296422
REACTOME_FORMATION_OF_ATP_BY_CHEMIOSMOTIC_COUPLING	0.592627	0.110427	0.190392	0.148258	0.0460157
BIOCARTA_NKT_PATHWAY	0.593301	0.0436595	0.387211	0.0847462	0.181891
REACTOME_SIGNALING_BY_FGFR1_FUSION_MUTANTS	0.595881	0.501861	0.225676	0.353044	0.377889
REACTOME_CASPASE_MEDIATED_CLEAVAGE_OF_CYTOSKELETAL_PROTEINS	0.597256	0.762986	0.51147	0.822077	0.93187
REACTOME_STEROID_HORMONES	0.59894	0.698933	0.991865	0.74077	0.974114
BIOCARTA_GLYCOLYSIS_PATHWAY	0.600084	0.628968	0.543757	0.897404	0.881949
REACTOME_CREATION_OF_C4_AND_C2_ACTIVATORS	0.600809	0.820167	0.381924	0.885511	0.88169
REACTOME_CHYLOMICRON_MEDIATED_LIPID_TRANSPORT	0.601654	0.18786	0.084513	0.137115	0.0522399
REACTOME_NOD1_2_SIGNALING_PATHWAY	0.601707	0.0271193	0.0897868	0.242589	0.0163237
REACTOME_THE_ACTIVATION_OF_ARYLSULFATASES	0.602289	0.720384	0.346531	0.708116	0.828767
REACTOME_TAK1_ACTIVATES_NFKB_BY_PHOSPHORYLATION_AND_ACTIVATION_OF_IKKS_COMPLEX	0.606749	0.366741	0.820967	0.654857	0.655205
REACTOME_PHASE_II_CONJUGATION	0.608326	0.0579117	0.402748	0.367845	0.417942
BIOCARTA_ARF_PATHWAY	0.60918	0.712031	0.0425026	0.485645	0.12641
BIOCARTA_NGF_PATHWAY	0.611996	0.916665	0.137874	0.922684	0.436201
BIOCARTA_CHREBP2_PATHWAY	0.612036	0.340484	0.655813	0.273237	0.586781
KEGG_LEISHMANIA_INFECTION	0.612447	0.0582127	0.349806	0.207193	0.112189
REACTOME_TCA_CYCLE_AND_RESPIRATORY_ELECTRON_TRANSPORT	0.612893	0.696873	0.55803	0.669589	0.61478
REACTOME_G1_S_TRANSITION	0.614563	0.749728	0.288287	0.703695	0.502241
REACTOME_METABOLISM_OF_STEROID_HORMONES_AND_VITAMINS_A_AND_D	0.615312	0.768104	0.974916	0.897946	0.965077
REACTOME_PLATELET_ADHESION_TO_EXPOSED_COLLAGEN	0.6164	0.246719	0.962302	0.4731	0.664846
REACTOME_CYTOCHROME_P450_ARRANGED_BY_SUBSTRATE_TYPE	0.617208	0.72966	0.663575	0.746693	0.556803
REACTOME_AMINE_DERIVED_HORMONES	0.619091	0.320786	0.0480408	0.256241	0.0831184
REACTOME_DESTABILIZATION_OF_MRNA_BY_KSRP	0.619754	0.193378	0.0846404	0.312681	0.0386105
BIOCARTA_CFTR_PATHWAY	0.619867	0.186979	0.222235	0.131986	0.275856
REACTOME_HIV_INFECTION	0.620319	0.352365	0.654013	0.633841	0.520642
REACTOME_N_GLYCAN_TRIMMING_IN_THE_ER_AND_CALNEXIN_CALRETICULIN_CYCLE	0.621152	0.810229	0.271289	0.564591	0.583897
REACTOME_MRNA_PROCESSING	0.621167	0.162274	0.240307	0.357347	0.0998644
REACTOME_POST_TRANSLATIONAL_MODIFICATION_SYNTHESIS_OF_GPI_ANCHORED_PROTEINS	0.623602	0.773837	0.284629	0.720274	0.536275
REACTOME_SIGNALING_BY_NOTCH4	0.623984	0.433608	0.800812	0.393403	0.666223
BIOCARTA_STATHMIN_PATHWAY	0.625008	0.0557549	0.204745	0.175691	0.0752781
REACTOME_GLYCOSAMINOGLYCAN_METABOLISM	0.626871	0.156466	0.604319	0.200144	0.381916
KEGG_VIBRIO_CHOLERAE_INFECTION	0.626921	0.352183	0.762762	0.36371	0.759424
REACTOME_FORMATION_OF_TRANSCRIPTION_COUPLED_NER_TC_NER_REPAIR_COMPLEX	0.630863	0.561572	0.985913	0.720975	0.748109
KEGG_COMPLEMENT_AND_COAGULATION_CASCADES	0.63104	0.956909	0.804264	0.926567	0.967629
BIOCARTA_FCER1_PATHWAY	0.631797	0.665861	0.226052	0.729007	0.572684
REACTOME_TRANSFERRIN_ENDOCYTOSIS_AND_RECYCLING	0.634408	0.389722	0.821278	0.756885	0.816974
REACTOME_CLASS_I_MHC_MEDIATED_ANTIGEN_PROCESSING_PRESENTATION	0.634818	0.421738	0.810437	0.502941	0.808929
KEGG_TOLL_LIKE_RECEPTOR_SIGNALING_PATHWAY	0.63613	0.69374	0.476791	0.918133	0.512543
REACTOME_CELL_CYCLE_CHECKPOINTS	0.636516	0.758385	0.125597	0.584534	0.334194
REACTOME_NRIF_SIGNALS_CELL_DEATH_FROM_THE_NUCLEUS	0.636973	0.471135	0.753099	0.765359	0.805693
REACTOME_NEP_NS2_INTERACTS_WITH_THE_CELLULAR_EXPORT_MACHINERY	0.637139	0.0884366	0.397721	0.629072	0.290448
BIOCARTA_IGF1R_PATHWAY	0.638162	0.110468	0.100984	0.317278	0.213802
REACTOME_GLUCAGON_SIGNALING_IN_METABOLIC_REGULATION	0.638712	0.0103182	0.392869	0.0793287	0.221818
REACTOME_PYRIMIDINE_METABOLISM	0.638831	0.98679	0.962616	0.767551	0.915535
KEGG_AMINO_SUGAR_AND_NUCLEOTIDE_SUGAR_METABOLISM	0.642262	0.0925929	0.381555	0.269816	0.53682
REACTOME_GABA_B_RECEPTOR_ACTIVATION	0.64287	0.0353285	0.642689	0.223457	0.12738
KEGG_ETHER_LIPID_METABOLISM	0.645921	0.536178	0.271733	0.755404	0.179082
BIOCARTA_FMLP_PATHWAY	0.646017	0.033416	0.454239	0.390085	0.125409
BIOCARTA_MTOR_PATHWAY	0.647465	0.77123	0.73722	0.660687	0.784466
BIOCARTA_AT1R_PATHWAY	0.647762	0.192912	0.409917	0.668953	0.34057
REACTOME_ACTIVATED_TAK1_MEDIATES_P38_MAPK_ACTIVATION	0.649646	0.130561	0.219033	0.441819	0.164447
REACTOME_REGULATION_OF_GLUCOKINASE_BY_GLUCOKINASE_REGULATORY_PROTEIN	0.649895	0.0384398	0.280061	0.451183	0.134506
REACTOME_G2_M_DNA_DAMAGE_CHECKPOINT	0.650068	0.927995	0.85034	0.865005	0.892169
KEGG_PPAR_SIGNALING_PATHWAY	0.650347	0.28487	0.0188453	0.590336	0.0509294
BIOCARTA_NKCELLS_PATHWAY	0.652884	0.819019	0.613001	0.783032	0.802244
KEGG_NITROGEN_METABOLISM	0.654645	0.794179	0.515717	0.781025	0.891272
REACTOME_MRNA_DECAY_BY_3_TO_5_EXORIBONUCLEASE	0.655639	0.126502	0.16831	0.221441	0.0762549
REACTOME_MRNA_CAPPING	0.656431	0.360195	0.988623	0.584315	0.758978
BIOCARTA_PTC1_PATHWAY	0.656563	0.834795	0.918806	0.840927	0.879436
REACTOME_SIGNALING_BY_NOTCH3	0.65686	0.517553	0.858349	0.471526	0.740774
REACTOME_REGULATION_OF_INSULIN_LIKE_GROWTH_FACTOR_IGF_ACTIVITY_BY_INSULIN_LIKE_GROWTH_FACTOR_BINDING_PROTEINS_IGFBPS	0.657282	0.524432	0.0711975	0.492148	0.190771
BIOCARTA_ERK5_PATHWAY	0.659675	0.2563	0.107811	0.386284	0.311698
BIOCARTA_TOLL_PATHWAY	0.661983	0.218615	0.180945	0.48815	0.101869
REACTOME_ANTIGEN_ACTIVATES_B_CELL_RECEPTOR_LEADING_TO_GENERATION_OF_SECOND_MESSENGERS	0.662409	0.92065	0.758884	0.87281	0.997945
REACTOME_REGULATION_OF_BETA_CELL_DEVELOPMENT	0.662631	0.568052	0.260683	0.671441	0.384576
KEGG_N_GLYCAN_BIOSYNTHESIS	0.663263	0.954634	0.703786	0.596423	0.978661
REACTOME_IL1_SIGNALING	0.663655	0.0948126	0.663578	0.451373	0.237727
REACTOME_SYNTHESIS_OF_GLYCOSYLPHOSPHATIDYLINOSITOL_GPI	0.665695	0.790734	0.531107	0.857354	0.652489
REACTOME_MRNA_SPLICING_MINOR_PATHWAY	0.668146	0.462467	0.958065	0.576215	0.821527
REACTOME_ASSOCIATION_OF_TRIC_CCT_WITH_TARGET_PROTEINS_DURING_BIOSYNTHESIS	0.669718	0.960651	0.955457	0.919057	0.979844
BIOCARTA_CLASSIC_PATHWAY	0.670059	0.691164	0.11418	0.895989	0.294504
BIOCARTA_ARENRF2_PATHWAY	0.670894	0.337389	0.269353	0.672156	0.156058
REACTOME_APOPTOTIC_CLEAVAGE_OF_CELLULAR_PROTEINS	0.673082	0.387022	0.590416	0.507419	0.606365
REACTOME_INFLAMMASOMES	0.674493	0.846376	0.246518	0.501207	0.657189
REACTOME_MITOTIC_M_M_G1_PHASES	0.676196	0.506776	0.034552	0.45546	0.102868
REACTOME_NUCLEOTIDE_BINDING_DOMAIN_LEUCINE_RICH_REPEAT_CONTAINING_RECEPTOR_NLR_SIGNALING_PATHWAYS	0.676408	0.129598	0.0654504	0.289084	0.0554331
REACTOME_SPHINGOLIPID_METABOLISM	0.6781	0.559284	0.1903	0.707635	0.458784
REACTOME_MITOCHONDRIAL_FATTY_ACID_BETA_OXIDATION	0.679118	0.862274	0.272436	0.907219	0.473541
REACTOME_NFKB_IS_ACTIVATED_AND_SIGNALS_SURVIVAL	0.681196	0.418751	0.665511	0.672306	0.697558
REACTOME_DESTABILIZATION_OF_MRNA_BY_TRISTETRAPROLIN_TTP	0.681308	0.272738	0.519184	0.264688	0.267623
REACTOME_ZINC_TRANSPORTERS	0.681345	0.962367	0.698123	0.729589	0.94328
KEGG_GRAFT_VERSUS_HOST_DISEASE	0.681381	0.684762	0.690043	0.789114	0.886206
REACTOME_IRAK2_MEDIATED_ACTIVATION_OF_TAK1_COMPLEX_UPON_TLR7_8_OR_9_STIMULATION	0.682152	0.264312	0.938683	0.368628	0.846439
REACTOME_ASSEMBLY_OF_THE_PRE_REPLICATIVE_COMPLEX	0.683049	0.763616	0.177239	0.69734	0.435955
REACTOME_SYNTHESIS_OF_SUBSTRATES_IN_N_GLYCAN_BIOSYTHESIS	0.683059	0.251286	0.217295	0.342557	0.240706
KEGG_GLYCOSAMINOGLYCAN_BIOSYNTHESIS_HEPARAN_SULFATE	0.687662	0.88623	0.791242	0.940348	0.967675
BIOCARTA_EIF4_PATHWAY	0.690161	0.790076	0.535108	0.71896	0.825791
REACTOME_PERK_REGULATED_GENE_EXPRESSION	0.690581	0.714475	0.545965	0.640893	0.471469
BIOCARTA_CCR5_PATHWAY	0.691636	0.748256	0.250194	0.701231	0.239208
KEGG_FRUCTOSE_AND_MANNOSE_METABOLISM	0.691637	0.379427	0.994691	0.401937	0.927465
REACTOME_SIGNALING_BY_HIPPO	0.691699	0.732966	0.601616	0.56538	0.697353
REACTOME_EFFECTS_OF_PIP2_HYDROLYSIS	0.692722	0.552969	0.200436	0.594622	0.22899
REACTOME_METAL_ION_SLC_TRANSPORTERS	0.694531	0.826842	0.681479	0.54884	0.68295
REACTOME_GABA_RECEPTOR_ACTIVATION	0.697685	0.048773	0.73436	0.25	0.166544
BIOCARTA_FREE_PATHWAY	0.697765	0.0977992	0.458037	0.264098	0.109105
REACTOME_ORC1_REMOVAL_FROM_CHROMATIN	0.699445	0.575472	0.0567129	0.664326	0.266288
KEGG_RIBOFLAVIN_METABOLISM	0.701426	0.595748	0.821825	0.626159	0.632741
REACTOME_MRNA_SPLICING	0.701599	0.626857	0.227601	0.542143	0.227791
REACTOME_REGULATION_OF_INSULIN_SECRETION_BY_GLUCAGON_LIKE_PEPTIDE1	0.701815	0.102789	0.36688	0.224469	0.581404
BIOCARTA_MCALPAIN_PATHWAY	0.701837	0.0312913	0.45908	0.13215	0.216431
KEGG_GLYCOSPHINGOLIPID_BIOSYNTHESIS_GANGLIO_SERIES	0.70217	0.807526	0.910016	0.553947	0.898477
KEGG_CIRCADIAN_RHYTHM_MAMMAL	0.702439	0.389585	0.516589	0.612393	0.187382
REACTOME_INTEGRATION_OF_PROVIRUS	0.706027	0.309779	0.35049	0.587459	0.370243
KEGG_CYTOSOLIC_DNA_SENSING_PATHWAY	0.706994	0.757885	0.911649	0.756472	0.7207
REACTOME_CONVERSION_FROM_APC_C_CDC20_TO_APC_C_CDH1_IN_LATE_ANAPHASE	0.707257	0.674808	0.345799	0.453989	0.349391
KEGG_GLUTATHIONE_METABOLISM	0.710675	0.0596265	0.323948	0.385842	0.218342
REACTOME_ION_CHANNEL_TRANSPORT	0.711635	0.587509	0.842885	0.429065	0.735804
REACTOME_GOLGI_ASSOCIATED_VESICLE_BIOGENESIS	0.711921	0.52298	0.825677	0.447242	0.82616
BIOCARTA_KREB_PATHWAY	0.713832	0.403712	0.95996	0.485749	0.763826
REACTOME_ELEVATION_OF_CYTOSOLIC_CA2_LEVELS	0.714609	0.300357	0.113733	0.313287	0.200567
REACTOME_KERATAN_SULFATE_DEGRADATION	0.716671	0.472051	0.739194	0.552151	0.543427
BIOCARTA_LECTIN_PATHWAY	0.717452	0.652774	0.223358	0.748781	0.374831
REACTOME_SIGNALING_BY_ROBO_RECEPTOR	0.718604	0.957714	0.193331	0.834973	0.398975
REACTOME_TRANSMEMBRANE_TRANSPORT_OF_SMALL_MOLECULES	0.718632	0.00411546	0.730145	0.0620366	0.0965457
REACTOME_M_G1_TRANSITION	0.718757	0.808223	0.202948	0.743605	0.529294
REACTOME_PURINE_RIBONUCLEOSIDE_MONOPHOSPHATE_BIOSYNTHESIS	0.718809	0.369626	0.931437	0.431469	0.725898
REACTOME_SIGNAL_REGULATORY_PROTEIN_SIRP_FAMILY_INTERACTIONS	0.720513	0.586414	0.212601	0.912455	0.359515
BIOCARTA_BCR_PATHWAY	0.721475	0.497784	0.387578	0.870323	0.44075
REACTOME_TRANSPORT_OF_GLUCOSE_AND_OTHER_SUGARS_BILE_SALTS_AND_ORGANIC_ACIDS_METAL_IONS_AND_AMINE_COMPOUNDS	0.723796	0.609791	0.302966	0.669303	0.334042
REACTOME_PROCESSING_OF_CAPPED_INTRON_CONTAINING_PRE_MRNA	0.724054	0.263478	0.20255	0.539137	0.148611
REACTOME_PRESYNAPTIC_NICOTINIC_ACETYLCHOLINE_RECEPTORS	0.724942	0.431333	0.299033	0.840311	0.15716
REACTOME_BETA_DEFENSINS	0.728473	0.945318	0.82245	0.823321	0.922783
REACTOME_LIGAND_GATED_ION_CHANNEL_TRANSPORT	0.728895	0.909571	0.970232	0.718153	0.941909
BIOCARTA_NUCLEARRS_PATHWAY	0.729839	0.613842	0.466087	0.914254	0.492274
REACTOME_INSULIN_RECEPTOR_RECYCLING	0.730192	0.276685	0.706303	0.65448	0.713822
REACTOME_REVERSIBLE_HYDRATION_OF_CARBON_DIOXIDE	0.73091	0.53991	0.220724	0.566516	0.490814
REACTOME_REGULATION_OF_THE_FANCONI_ANEMIA_PATHWAY	0.731304	0.585816	0.733646	0.66056	0.74802
KEGG_GALACTOSE_METABOLISM	0.732772	0.2374	0.730478	0.495641	0.434195
REACTOME_TRANS_GOLGI_NETWORK_VESICLE_BUDDING	0.733091	0.585546	0.89656	0.406101	0.885039
REACTOME_ADVANCED_GLYCOSYLATION_ENDPRODUCT_RECEPTOR_SIGNALING	0.734214	0.617106	0.704505	0.853496	0.84729
REACTOME_RNA_POL_I_TRANSCRIPTION_TERMINATION	0.738882	0.782627	0.957067	0.772004	0.756419
REACTOME_INHIBITION_OF_THE_PROTEOLYTIC_ACTIVITY_OF_APC_C_REQUIRED_FOR_THE_ONSET_OF_ANAPHASE_BY_MITOTIC_SPINDLE_CHECKPOINT_COMPONENTS	0.739585	0.72039	0.362469	0.569495	0.408977
REACTOME_CITRIC_ACID_CYCLE_TCA_CYCLE	0.74019	0.45295	0.818613	0.68968	0.842408
REACTOME_ION_TRANSPORT_BY_P_TYPE_ATPASES	0.741079	0.454612	0.485886	0.422669	0.475642
KEGG_LYSINE_DEGRADATION	0.741603	0.863559	0.576545	0.856513	0.855903
BIOCARTA_AGPCR_PATHWAY	0.745258	0.296058	0.495351	0.268137	0.763138
BIOCARTA_UCALPAIN_PATHWAY	0.747234	0.702654	0.16812	0.606036	0.202886
REACTOME_ACTIVATION_OF_GENES_BY_ATF4	0.747406	0.612412	0.432779	0.540506	0.329903
BIOCARTA_GPCR_PATHWAY	0.747581	0.248754	0.576931	0.377841	0.581776
REACTOME_SIGNALING_BY_FGFR3_MUTANTS	0.748522	0.333345	0.705282	0.451163	0.316269
REACTOME_PREFOLDIN_MEDIATED_TRANSFER_OF_SUBSTRATE_TO_CCT_TRIC	0.748728	0.937982	0.390929	0.812537	0.597471
REACTOME_CDT1_ASSOCIATION_WITH_THE_CDC6_ORC_ORIGIN_COMPLEX	0.749626	0.801906	0.2831	0.759976	0.623448
KEGG_SNARE_INTERACTIONS_IN_VESICULAR_TRANSPORT	0.74965	0.0599054	0.60129	0.284994	0.359252
KEGG_PANTOTHENATE_AND_COA_BIOSYNTHESIS	0.750107	0.0418075	0.449212	0.177358	0.0510069
BIOCARTA_GLEEVEC_PATHWAY	0.753289	0.502186	0.146408	0.711545	0.230892
BIOCARTA_G2_PATHWAY	0.75393	0.321355	0.0575105	0.504682	0.189102
REACTOME_PEROXISOMAL_LIPID_METABOLISM	0.754843	0.845279	0.455316	0.687168	0.672487
KEGG_GLYCOLYSIS_GLUCONEOGENESIS	0.756239	0.832176	0.628629	0.748112	0.609736
REACTOME_SYNTHESIS_OF_PC	0.756514	0.849103	0.639833	0.832573	0.562557
REACTOME_APC_CDC20_MEDIATED_DEGRADATION_OF_NEK2A	0.757864	0.635326	0.551552	0.516296	0.570752
KEGG_CYSTEINE_AND_METHIONINE_METABOLISM	0.758455	0.0661472	0.48084	0.22862	0.0949303
REACTOME_CYTOKINE_SIGNALING_IN_IMMUNE_SYSTEM	0.761065	0.102111	0.841785	0.672739	0.469285
REACTOME_METABOLISM_OF_PROTEINS	0.761794	0.463082	0.5098	0.264414	0.547325
REACTOME_POST_NMDA_RECEPTOR_ACTIVATION_EVENTS	0.76213	0.0412771	0.626706	0.475327	0.389732
REACTOME_ADP_SIGNALLING_THROUGH_P2RY1	0.763808	0.0729063	0.418164	0.326177	0.257824
REACTOME_SIGNALING_BY_WNT	0.76457	0.740511	0.248511	0.812713	0.46326
REACTOME_ACTIVATED_NOTCH1_TRANSMITS_SIGNAL_TO_THE_NUCLEUS	0.765626	0.50745	0.836383	0.49223	0.833416
BIOCARTA_GSK3_PATHWAY	0.766019	0.446129	0.518024	0.687709	0.339385
KEGG_VALINE_LEUCINE_AND_ISOLEUCINE_DEGRADATION	0.769077	0.802195	0.630315	0.598707	0.424012
REACTOME_THE_ROLE_OF_NEF_IN_HIV1_REPLICATION_AND_DISEASE_PATHOGENESIS	0.76968	0.320567	0.692088	0.532607	0.35467
KEGG_ANTIGEN_PROCESSING_AND_PRESENTATION	0.770335	0.979187	0.809357	0.921697	0.961716
REACTOME_P53_DEPENDENT_G1_DNA_DAMAGE_RESPONSE	0.772136	0.513234	0.0763661	0.826038	0.328523
REACTOME_CYTOSOLIC_TRNA_AMINOACYLATION	0.773295	0.748489	0.552896	0.642003	0.728825
REACTOME_KINESINS	0.773425	0.829998	0.13844	0.705757	0.19251
REACTOME_TRYPTOPHAN_CATABOLISM	0.774251	0.583048	0.570855	0.543775	0.754105
REACTOME_RNA_POL_III_TRANSCRIPTION_TERMINATION	0.776103	0.589101	0.896208	0.675699	0.590351
REACTOME_RESOLUTION_OF_AP_SITES_VIA_THE_SINGLE_NUCLEOTIDE_REPLACEMENT_PATHWAY	0.776105	0.530023	0.927038	0.946848	0.824301
KEGG_GLYCEROPHOSPHOLIPID_METABOLISM	0.776361	0.608767	0.610683	0.833712	0.494972
REACTOME_REGULATION_OF_APOPTOSIS	0.777153	0.7944	0.318713	0.840624	0.670464
REACTOME_MEMBRANE_BINDING_AND_TARGETTING_OF_GAG_PROTEINS	0.777742	0.792826	0.921774	0.76278	0.951363
REACTOME_RNA_POL_I_RNA_POL_III_AND_MITOCHONDRIAL_TRANSCRIPTION	0.777858	0.719752	0.844515	0.752739	0.490713
BIOCARTA_HDAC_PATHWAY	0.780393	0.111511	0.19798	0.311307	0.318939
REACTOME_DESTABILIZATION_OF_MRNA_BY_BRF1	0.780844	0.289103	0.309064	0.409604	0.157532
KEGG_TAURINE_AND_HYPOTAURINE_METABOLISM	0.782287	0.307355	0.187976	0.454255	0.183953
REACTOME_THROMBIN_SIGNALLING_THROUGH_PROTEINASE_ACTIVATED_RECEPTORS_PARS	0.782341	0.0301527	0.825704	0.106927	0.492957
KEGG_GLYCOSAMINOGLYCAN_BIOSYNTHESIS_CHONDROITIN_SULFATE	0.782859	0.343036	0.874025	0.520272	0.737671
REACTOME_PROTEIN_FOLDING	0.784944	0.965062	0.864697	0.932735	0.927413
REACTOME_RNA_POL_III_CHAIN_ELONGATION	0.785122	0.584213	0.861685	0.681538	0.572707
REACTOME_KERATAN_SULFATE_BIOSYNTHESIS	0.785475	0.57363	0.746137	0.551267	0.603277
REACTOME_ACTIVATION_OF_THE_AP1_FAMILY_OF_TRANSCRIPTION_FACTORS	0.786497	0.662567	0.00257602	0.79768	0.103336
REACTOME_REGULATION_OF_MITOTIC_CELL_CYCLE	0.787575	0.938225	0.0801554	0.893167	0.469071
REACTOME_APC_C_CDC20_MEDIATED_DEGRADATION_OF_CYCLIN_B	0.78843	0.736641	0.538343	0.567765	0.580963
REACTOME_CDK_MEDIATED_PHOSPHORYLATION_AND_REMOVAL_OF_CDC6	0.789636	0.825829	0.16941	0.907988	0.64352
REACTOME_SMOOTH_MUSCLE_CONTRACTION	0.790423	0.85749	0.275688	0.653733	0.715339
KEGG_TYPE_I_DIABETES_MELLITUS	0.790555	0.816867	0.663045	0.966643	0.938572
REACTOME_BRANCHED_CHAIN_AMINO_ACID_CATABOLISM	0.791199	0.38347	0.484819	0.310867	0.165488
REACTOME_HIGHLY_CALCIUM_PERMEABLE_POSTSYNAPTIC_NICOTINIC_ACETYLCHOLINE_RECEPTORS	0.791721	0.403952	0.342178	0.91149	0.158175
REACTOME_ACYL_CHAIN_REMODELLING_OF_PG	0.792527	0.127148	0.319739	0.23461	0.123806
BIOCARTA_GH_PATHWAY	0.795708	0.550921	0.230761	0.830129	0.620238
BIOCARTA_GATA3_PATHWAY	0.797751	0.0415827	0.174204	0.166752	0.101547
REACTOME_DOUBLE_STRAND_BREAK_REPAIR	0.797803	0.616354	0.469531	0.607134	0.49383
REACTOME_CHEMOKINE_RECEPTORS_BIND_CHEMOKINES	0.799175	0.344785	0.432716	0.484988	0.37966
REACTOME_SYNTHESIS_OF_PE	0.800481	0.783121	0.779626	0.594187	0.552698
REACTOME_G_PROTEIN_ACTIVATION	0.800998	0.3041	0.862366	0.418695	0.957136
REACTOME_HOMOLOGOUS_RECOMBINATION_REPAIR_OF_REPLICATION_INDEPENDENT_DOUBLE_STRAND_BREAKS	0.801223	0.354022	0.284507	0.448372	0.242036
REACTOME_GLUCONEOGENESIS	0.805213	0.794165	0.667738	0.9352	0.763024
REACTOME_ACTIVATION_OF_CHAPERONE_GENES_BY_ATF6_ALPHA	0.805826	0.951045	0.746448	0.953102	0.780016
KEGG_BUTANOATE_METABOLISM	0.80587	0.990251	0.672827	0.982253	0.900692
REACTOME_MHC_CLASS_II_ANTIGEN_PRESENTATION	0.806341	0.483052	0.0215811	0.655965	0.132751
BIOCARTA_CARDIACEGF_PATHWAY	0.80776	0.267462	0.192758	0.456583	0.152042
BIOCARTA_CCR3_PATHWAY	0.808236	0.0439616	0.701062	0.294361	0.526668
KEGG_GLYCOSYLPHOSPHATIDYLINOSITOL_GPI_ANCHOR_BIOSYNTHESIS	0.808792	0.795458	0.223359	0.843936	0.486518
REACTOME_VITAMIN_B5_PANTOTHENATE_METABOLISM	0.808952	0.0239034	0.0844967	0.291133	0.0254751
REACTOME_ACTIVATION_OF_CHAPERONES_BY_ATF6_ALPHA	0.808967	0.880391	0.812099	0.891282	0.814994
REACTOME_ACYL_CHAIN_REMODELLING_OF_PI	0.810813	0.326508	0.225912	0.500315	0.204975
REACTOME_RNA_POL_III_TRANSCRIPTION_INITIATION_FROM_TYPE_3_PROMOTER	0.811407	0.763989	0.904873	0.812607	0.643195
REACTOME_THROMBOXANE_SIGNALLING_THROUGH_TP_RECEPTOR	0.812348	0.0342464	0.93474	0.193115	0.636571
BIOCARTA_EPONFKB_PATHWAY	0.812766	0.324117	0.11424	0.571066	0.11849
REACTOME_CREB_PHOSPHORYLATION_THROUGH_THE_ACTIVATION_OF_CAMKII	0.813615	0.156677	0.764872	0.505758	0.38623
REACTOME_PHOSPHOLIPID_METABOLISM	0.813655	0.933371	0.579103	0.901951	0.790939
KEGG_ARRHYTHMOGENIC_RIGHT_VENTRICULAR_CARDIOMYOPATHY_ARVC	0.813855	0.698115	0.817494	0.573381	0.436855
REACTOME_ACTIVATION_OF_NMDA_RECEPTOR_UPON_GLUTAMATE_BINDING_AND_POSTSYNAPTIC_EVENTS	0.814113	0.0716987	0.498459	0.514067	0.387714
KEGG_BASAL_TRANSCRIPTION_FACTORS	0.818075	0.484186	0.56879	0.656907	0.874061
REACTOME_ADP_SIGNALLING_THROUGH_P2RY12	0.818777	0.156027	0.987091	0.310798	0.892661
REACTOME_SYNTHESIS_SECRETION_AND_DEACYLATION_OF_GHRELIN	0.819122	0.189121	0.280107	0.467146	0.215999
REACTOME_P53_INDEPENDENT_G1_S_DNA_DAMAGE_CHECKPOINT	0.820323	0.843943	0.254303	0.926257	0.675092
KEGG_RNA_POLYMERASE	0.820976	0.611959	0.857573	0.700175	0.718717
KEGG_MATURITY_ONSET_DIABETES_OF_THE_YOUNG	0.822139	0.415154	0.244903	0.704448	0.227209
KEGG_ONE_CARBON_POOL_BY_FOLATE	0.823349	0.627233	0.85725	0.779591	0.600093
REACTOME_DOWNSTREAM_SIGNALING_EVENTS_OF_B_CELL_RECEPTOR_BCR	0.823711	0.542018	0.236714	0.901899	0.435753
REACTOME_SCFSKP2_MEDIATED_DEGRADATION_OF_P27_P21	0.823974	0.620993	0.0987968	0.898278	0.430973
REACTOME_CELL_EXTRACELLULAR_MATRIX_INTERACTIONS	0.824559	0.860314	0.231469	0.996071	0.623781
REACTOME_VIF_MEDIATED_DEGRADATION_OF_APOBEC3G	0.824997	0.820588	0.21078	0.885057	0.576071
REACTOME_FORMATION_OF_INCISION_COMPLEX_IN_GG_NER	0.82533	0.745591	0.93585	0.919394	0.696741
REACTOME_METABOLISM_OF_CARBOHYDRATES	0.825952	0.114778	0.485905	0.484287	0.321959
BIOCARTA_PROTEASOME_PATHWAY	0.826121	0.878623	0.362559	0.889076	0.557056
REACTOME_CLEAVAGE_OF_GROWING_TRANSCRIPT_IN_THE_TERMINATION_REGION_	0.826761	0.188511	0.52947	0.214424	0.293399
REACTOME_METABOLISM_OF_NUCLEOTIDES	0.830757	0.850237	0.988676	0.676155	0.957651
KEGG_GLYCEROLIPID_METABOLISM	0.83105	0.873506	0.445231	0.928306	0.64559
KEGG_ALANINE_ASPARTATE_AND_GLUTAMATE_METABOLISM	0.833381	0.955045	0.522446	0.89745	0.716221
REACTOME_FACILITATIVE_NA_INDEPENDENT_GLUCOSE_TRANSPORTERS	0.836409	0.428488	0.101763	0.390789	0.213978
REACTOME_KERATAN_SULFATE_KERATIN_METABOLISM	0.837332	0.440357	0.850088	0.449979	0.572958
REACTOME_COPI_MEDIATED_TRANSPORT	0.838424	0.526015	0.866036	0.702365	0.888752
REACTOME_METABOLISM_OF_AMINO_ACIDS_AND_DERIVATIVES	0.83989	0.595881	0.405486	0.494208	0.567323
BIOCARTA_PGC1A_PATHWAY	0.840932	0.137723	0.563612	0.496044	0.3424
REACTOME_BASE_FREE_SUGAR_PHOSPHATE_REMOVAL_VIA_THE_SINGLE_NUCLEOTIDE_REPLACEMENT_PATHWAY	0.84217	0.484849	0.897585	0.908554	0.81434
REACTOME_SLC_MEDIATED_TRANSMEMBRANE_TRANSPORT	0.842545	0.0497243	0.183149	0.174018	0.0473782
REACTOME_CYCLIN_E_ASSOCIATED_EVENTS_DURING_G1_S_TRANSITION_	0.842758	0.590696	0.224414	0.885472	0.555685
REACTOME_BILE_SALT_AND_ORGANIC_ANION_SLC_TRANSPORTERS	0.843856	0.724984	0.970605	0.936654	0.93716
REACTOME_AUTODEGRADATION_OF_THE_E3_UBIQUITIN_LIGASE_COP1	0.84502	0.854552	0.231212	0.926222	0.668284
KEGG_PROTEASOME	0.848535	0.88355	0.163426	0.909461	0.589617
REACTOME_JNK_C_JUN_KINASES_PHOSPHORYLATION_AND_ACTIVATION_MEDIATED_BY_ACTIVATED_HUMAN_TAK1	0.848985	0.512732	0.181324	0.932401	0.402023
REACTOME_CREB_PHOSPHORYLATION_THROUGH_THE_ACTIVATION_OF_RAS	0.852568	0.109556	0.579922	0.721023	0.494311
REACTOME_INTRINSIC_PATHWAY	0.854348	0.736657	0.903508	0.896932	0.780055
REACTOME_HYALURONAN_METABOLISM	0.854985	0.501085	0.760923	0.623235	0.469863
KEGG_RNA_DEGRADATION	0.856038	0.879076	0.700826	0.97044	0.861888
REACTOME_SCF_BETA_TRCP_MEDIATED_DEGRADATION_OF_EMI1	0.856962	0.906442	0.278007	0.965184	0.772365
REACTOME_THE_NLRP3_INFLAMMASOME	0.857724	0.739156	0.214952	0.800812	0.432159
REACTOME_APC_C_CDH1_MEDIATED_DEGRADATION_OF_CDC20_AND_OTHER_APC_C_CDH1_TARGETED_PROTEINS_IN_LATE_MITOSIS_EARLY_G1	0.858535	0.913322	0.0540592	0.878348	0.369112
BIOCARTA_IL5_PATHWAY	0.858703	0.14131	0.8369	0.549338	0.55277
REACTOME_ORGANIC_CATION_ANION_ZWITTERION_TRANSPORT	0.859694	0.218834	0.60466	0.570712	0.67775
BIOCARTA_RANKL_PATHWAY	0.861424	0.39745	0.549954	0.615636	0.374773
KEGG_OTHER_GLYCAN_DEGRADATION	0.862814	0.121854	0.140329	0.503206	0.0689419
REACTOME_NEGATIVE_REGULATION_OF_THE_PI3K_AKT_NETWORK	0.863046	0.729666	0.537065	0.835555	0.591974
REACTOME_ACETYLCHOLINE_BINDING_AND_DOWNSTREAM_EVENTS	0.863921	0.456569	0.426797	0.933597	0.182851
REACTOME_SIGNAL_ATTENUATION	0.866996	0.532259	0.472212	0.856139	0.541595
REACTOME_RNA_POL_III_TRANSCRIPTION	0.868281	0.465759	0.830531	0.749829	0.435961
REACTOME_UNBLOCKING_OF_NMDA_RECEPTOR_GLUTAMATE_BINDING_AND_ACTIVATION	0.868337	0.223281	0.397096	0.583629	0.25316
REACTOME_CROSS_PRESENTATION_OF_SOLUBLE_EXOGENOUS_ANTIGENS_ENDOSOMES	0.870247	0.637128	0.172304	0.815758	0.52652
REACTOME_METABOLISM_OF_RNA	0.870916	0.154403	0.399303	0.536024	0.17492
REACTOME_RNA_POL_III_TRANSCRIPTION_INITIATION_FROM_TYPE_2_PROMOTER	0.871824	0.288372	0.721533	0.606115	0.343345
REACTOME_DEFENSINS	0.873432	0.965141	0.872958	0.922891	0.954667
REACTOME_ANTIGEN_PROCESSING_CROSS_PRESENTATION	0.874308	0.85454	0.55339	0.945389	0.91702
REACTOME_CLASS_C_3_METABOTROPIC_GLUTAMATE_PHEROMONE_RECEPTORS	0.874904	0.923714	0.937126	0.900962	0.927083
REACTOME_SIGNALING_BY_THE_B_CELL_RECEPTOR_BCR	0.877739	0.756543	0.355675	0.952061	0.811361
REACTOME_TRANSPORT_OF_MATURE_TRANSCRIPT_TO_CYTOPLASM	0.878282	0.0343391	0.561383	0.459595	0.198376
REACTOME_SIGNALING_BY_NOTCH	0.879635	0.815904	0.921891	0.859614	0.915204
KEGG_GLYCOSAMINOGLYCAN_DEGRADATION	0.880829	0.331742	0.991483	0.545153	0.839913
REACTOME_TRAFFICKING_OF_GLUR2_CONTAINING_AMPA_RECEPTORS	0.88148	0.778736	0.61434	0.813024	0.569693
REACTOME_GLUCOSE_TRANSPORT	0.882054	0.101913	0.469643	0.642605	0.282899
REACTOME_METABOLISM_OF_POLYAMINES	0.882212	0.670086	0.320542	0.772784	0.290534
BIOCARTA_NEUROTRANSMITTERS_PATHWAY	0.882936	0.521918	0.0659614	0.553509	0.115768
BIOCARTA_COMP_PATHWAY	0.883545	0.842351	0.272957	0.920247	0.593452
BIOCARTA_MONOCYTE_PATHWAY	0.883833	0.225877	0.172756	0.642053	0.19156
REACTOME_IONOTROPIC_ACTIVITY_OF_KAINATE_RECEPTORS	0.884211	0.650185	0.865549	0.709241	0.736092
REACTOME_MRNA_3_END_PROCESSING	0.884782	0.248331	0.267667	0.313674	0.142777
REACTOME_REGULATION_OF_ORNITHINE_DECARBOXYLASE_ODC	0.887119	0.845827	0.0822619	0.913027	0.467728
REACTOME_ACYL_CHAIN_REMODELLING_OF_PS	0.889112	0.596423	0.238421	0.698721	0.47081
REACTOME_DEADENYLATION_DEPENDENT_MRNA_DECAY	0.890652	0.774347	0.865767	0.879063	0.718924
REACTOME_TRIGLYCERIDE_BIOSYNTHESIS	0.890751	0.832745	0.584304	0.983001	0.67931
REACTOME_AKT_PHOSPHORYLATES_TARGETS_IN_THE_CYTOSOL	0.891206	0.0767865	0.381181	0.64766	0.212173
REACTOME_GPCR_LIGAND_BINDING	0.892661	0.667257	0.134979	0.775188	0.405713
KEGG_PROTEIN_EXPORT	0.893918	0.897181	0.865993	0.958443	0.970351
KEGG_FATTY_ACID_METABOLISM	0.894669	0.967117	0.121977	0.938443	0.463683
REACTOME_GASTRIN_CREB_SIGNALLING_PATHWAY_VIA_PKC_AND_MAPK	0.895462	0.527263	0.475859	0.631133	0.500708
REACTOME_METABOLISM_OF_MRNA	0.89581	0.45139	0.370463	0.69062	0.215147
REACTOME_AUTODEGRADATION_OF_CDH1_BY_CDH1_APC_C	0.896855	0.870814	0.221371	0.877789	0.592928
REACTOME_BIOSYNTHESIS_OF_THE_N_GLYCAN_PRECURSOR_DOLICHOL_LIPID_LINKED_OLIGOSACCHARIDE_LLO_AND_TRANSFER_TO_A_NASCENT_PROTEIN	0.897209	0.54182	0.437304	0.675216	0.596151
KEGG_PEROXISOME	0.89837	0.191937	0.700565	0.502082	0.346335
REACTOME_GLYCEROPHOSPHOLIPID_BIOSYNTHESIS	0.898706	0.593706	0.445021	0.846377	0.377962
REACTOME_INHIBITION_OF_INSULIN_SECRETION_BY_ADRENALINE_NORADRENALINE	0.899248	0.181596	0.938917	0.435736	0.829266
REACTOME_G_ALPHA_Q_SIGNALLING_EVENTS	0.899474	0.580158	0.469932	0.569554	0.458972
REACTOME_RAS_ACTIVATION_UOPN_CA2_INFUX_THROUGH_NMDA_RECEPTOR	0.899935	0.111282	0.829362	0.582768	0.386031
BIOCARTA_P35ALZHEIMERS_PATHWAY	0.900377	0.635672	0.835474	0.852294	0.68751
REACTOME_NEF_MEDIATED_DOWNREGULATION_OF_MHC_CLASS_I_COMPLEX_CELL_SURFACE_EXPRESSION	0.900929	0.358456	0.176924	0.701543	0.221617
REACTOME_DEADENYLATION_OF_MRNA	0.901564	0.864974	0.99068	0.863382	0.93649
REACTOME_INSULIN_SYNTHESIS_AND_PROCESSING	0.902948	0.461164	0.512999	0.943028	0.38567
BIOCARTA_CACAM_PATHWAY	0.904539	0.265351	0.656242	0.662618	0.502203
REACTOME_AMINE_LIGAND_BINDING_RECEPTORS	0.904745	0.652322	0.41948	0.977076	0.645487
BIOCARTA_DNAFRAGMENT_PATHWAY	0.907194	0.663301	0.29765	0.991516	0.646299
REACTOME_TRANSPORT_TO_THE_GOLGI_AND_SUBSEQUENT_MODIFICATION	0.90764	0.874038	0.745918	0.940157	0.964969
REACTOME_NOTCH1_INTRACELLULAR_DOMAIN_REGULATES_TRANSCRIPTION	0.907744	0.75924	0.677117	0.933797	0.831775
REACTOME_TRANSMISSION_ACROSS_CHEMICAL_SYNAPSES	0.909599	0.221082	0.839198	0.693	0.395444
REACTOME_TERMINATION_OF_O_GLYCAN_BIOSYNTHESIS	0.910235	0.727107	0.921552	0.834884	0.754897
BIOCARTA_SARS_PATHWAY	0.911244	0.532603	0.142205	0.897282	0.1995
REACTOME_REGULATION_OF_MRNA_STABILITY_BY_PROTEINS_THAT_BIND_AU_RICH_ELEMENTS	0.911801	0.803829	0.312176	0.89894	0.551712
REACTOME_APC_C_CDC20_MEDIATED_DEGRADATION_OF_MITOTIC_PROTEINS	0.913328	0.899909	0.16314	0.865041	0.53995
KEGG_STARCH_AND_SUCROSE_METABOLISM	0.914871	0.490012	0.178903	0.877005	0.239737
REACTOME_ER_PHAGOSOME_PATHWAY	0.91719	0.943697	0.345443	0.967947	0.853034
REACTOME_DESTABILIZATION_OF_MRNA_BY_AUF1_HNRNP_D0	0.917688	0.846997	0.309172	0.943608	0.687761
REACTOME_HOST_INTERACTIONS_OF_HIV_FACTORS	0.91808	0.472275	0.467466	0.910364	0.505492
BIOCARTA_NDKDYNAMIN_PATHWAY	0.920632	0.615105	0.984348	0.794058	0.936541
REACTOME_MEMBRANE_TRAFFICKING	0.921646	0.395313	0.936716	0.564872	0.919107
REACTOME_TRAFFICKING_OF_AMPA_RECEPTORS	0.922431	0.706847	0.406907	0.900268	0.501502
REACTOME_HYALURONAN_UPTAKE_AND_DEGRADATION	0.923084	0.349427	0.60299	0.561946	0.301494
REACTOME_PROSTACYCLIN_SIGNALLING_THROUGH_PROSTACYCLIN_RECEPTOR	0.926241	0.0646013	0.915206	0.252853	0.775528
REACTOME_G_BETA_GAMMA_SIGNALLING_THROUGH_PLC_BETA	0.9285	0.0898048	0.980626	0.234358	0.838989
KEGG_TYPE_II_DIABETES_MELLITUS	0.928508	0.576009	0.199098	0.846291	0.502108
REACTOME_INTERFERON_SIGNALING	0.92969	0.10451	0.778548	0.800257	0.333958
REACTOME_SYNTHESIS_OF_PIPS_AT_THE_GOLGI_MEMBRANE	0.930824	0.903417	0.977577	0.908441	0.916554
KEGG_CITRATE_CYCLE_TCA_CYCLE	0.93443	0.771739	0.747257	0.971048	0.834417
REACTOME_ACTIVATION_OF_NF_KAPPAB_IN_B_CELLS	0.935235	0.842976	0.298882	0.939826	0.762707
BIOCARTA_GRANULOCYTES_PATHWAY	0.939683	0.539867	0.0982186	0.898035	0.285087
KEGG_NOD_LIKE_RECEPTOR_SIGNALING_PATHWAY	0.939768	0.538508	0.141133	0.924078	0.25871
REACTOME_PEPTIDE_LIGAND_BINDING_RECEPTORS	0.940505	0.884374	0.364092	0.905769	0.721116
REACTOME_OPSINS	0.940656	0.460381	0.970916	0.819047	0.766517
REACTOME_ASPARAGINE_N_LINKED_GLYCOSYLATION	0.941513	0.943271	0.666331	0.872233	0.952585
REACTOME_SIGNALING_BY_NOTCH1	0.942304	0.781085	0.786721	0.897726	0.902524
REACTOME_G_ALPHA_I_SIGNALLING_EVENTS	0.944942	0.180392	0.174704	0.733955	0.297004
REACTOME_PURINE_METABOLISM	0.948685	0.572786	0.943577	0.62972	0.944117
REACTOME_GLUTATHIONE_CONJUGATION	0.950836	0.168486	0.29496	0.720421	0.394505
REACTOME_CLASS_A1_RHODOPSIN_LIKE_RECEPTORS	0.955947	0.849009	0.1403	0.933122	0.469728
REACTOME_METABOLISM_OF_VITAMINS_AND_COFACTORS	0.957808	0.197831	0.684359	0.700489	0.35681
REACTOME_GLYCOSPHINGOLIPID_METABOLISM	0.957972	0.568477	0.493733	0.766219	0.655401
REACTOME_ANTIVIRAL_MECHANISM_BY_IFN_STIMULATED_GENES	0.961861	0.530542	0.895905	0.951019	0.824018
BIOCARTA_CDMAC_PATHWAY	0.962716	0.221832	0.251732	0.710526	0.267985
REACTOME_LIPOPROTEIN_METABOLISM	0.96344	0.672145	0.0245375	0.680149	0.133335
REACTOME_PYRUVATE_METABOLISM_AND_CITRIC_ACID_TCA_CYCLE	0.965433	0.768828	0.814528	0.943967	0.822049
REACTOME_NEF_MEDIATES_DOWN_MODULATION_OF_CELL_SURFACE_RECEPTORS_BY_RECRUITING_THEM_TO_CLATHRIN_ADAPTERS	0.966647	0.414511	0.493549	0.856247	0.378852
BIOCARTA_EPO_PATHWAY	0.966869	0.522808	0.287156	0.964717	0.437517
REACTOME_O_LINKED_GLYCOSYLATION_OF_MUCINS	0.967043	0.301261	0.721801	0.430165	0.417141
REACTOME_INHIBITION_OF_VOLTAGE_GATED_CA2_CHANNELS_VIA_GBETA_GAMMA_SUBUNITS	0.968271	0.084848	0.64709	0.467757	0.332382
KEGG_SPLICEOSOME	0.968931	0.86169	0.359977	0.910249	0.555347
REACTOME_PURINE_SALVAGE	0.969118	0.691014	0.918233	0.895919	0.975017
REACTOME_ACYL_CHAIN_REMODELLING_OF_PC	0.969158	0.354843	0.182654	0.612151	0.176734
REACTOME_SYNTHESIS_OF_VERY_LONG_CHAIN_FATTY_ACYL_COAS	0.971579	0.832802	0.519969	0.971805	0.557352
KEGG_NEUROACTIVE_LIGAND_RECEPTOR_INTERACTION	0.971676	0.909501	0.771243	0.998517	0.76108
REACTOME_ACTIVATION_OF_KAINATE_RECEPTORS_UPON_GLUTAMATE_BINDING	0.974758	0.177586	0.990449	0.39618	0.876763
BIOCARTA_IL3_PATHWAY	0.975383	0.180808	0.361958	0.977857	0.32232
REACTOME_ACYL_CHAIN_REMODELLING_OF_PE	0.97588	0.268468	0.271095	0.501519	0.201389
REACTOME_G_BETA_GAMMA_SIGNALLING_THROUGH_PI3KGAMMA	0.976372	0.109737	0.918331	0.57999	0.831289
REACTOME_POST_TRANSLATIONAL_PROTEIN_MODIFICATION	0.98108	0.772759	0.384533	0.719641	0.714287
REACTOME_G_PROTEIN_BETA_GAMMA_SIGNALLING	0.981338	0.118164	0.957701	0.490895	0.89075
REACTOME_UNFOLDED_PROTEIN_RESPONSE	0.981889	0.990548	0.281104	0.957474	0.686008
REACTOME_REGULATION_OF_PYRUVATE_DEHYDROGENASE_PDH_COMPLEX	0.982688	0.858653	0.528198	0.846876	0.804328
REACTOME_NEUROTRANSMITTER_RECEPTOR_BINDING_AND_DOWNSTREAM_TRANSMISSION_IN_THE_POSTSYNAPTIC_CELL	0.98496	0.0778431	0.891822	0.733981	0.411411
KEGG_O_GLYCAN_BIOSYNTHESIS	0.985046	0.879372	0.940275	0.923834	0.946931
REACTOME_INWARDLY_RECTIFYING_K_CHANNELS	0.986632	0.049739	0.757542	0.483266	0.325762
REACTOME_FATTY_ACYL_COA_BIOSYNTHESIS	0.986907	0.883114	0.673197	0.994693	0.72511
REACTOME_REGULATION_OF_GENE_EXPRESSION_IN_BETA_CELLS	0.991607	0.217578	0.286819	0.878472	0.315494
REACTOME_DIABETES_PATHWAYS	0.993144	0.924834	0.17852	0.97419	0.42719
REACTOME_ACTIVATION_OF_CHAPERONE_GENES_BY_XBP1S	0.993508	0.992555	0.166958	0.976982	0.69677
REACTOME_HDL_MEDIATED_LIPID_TRANSPORT	0.993665	0.881695	0.00639706	0.904043	0.156655
REACTOME_ANTIGEN_PRESENTATION_FOLDING_ASSEMBLY_AND_PEPTIDE_LOADING_OF_CLASS_I_MHC	0.99411	0.33678	0.879111	0.895382	0.731734
REACTOME_PYRUVATE_METABOLISM	0.999282	0.950716	0.702499	0.962796	0.872235
